# Supplementary material for: BOSO: A novel feature selection algorithm for linear regression with high-dimensional data
Source: PLoS Comput Biol. 2022 May 31;18(5):e1010180. doi: 10.1371/journal.pcbi.1010180 (PMC9187084; doi:10.1371/journal.pcbi.1010180)
Supplement: S9 Table — Using the BOSO-AIC model, prediction of MTX IC50 values in micro molar for cell lines that are not included in the training process: 708 cell lines that are not present in the GDSC database and 6 cell lines part of the GDSC database for experimental validation purposes. Column ‘DepMap_ID’ is the identifier of the cell line in the DepMap initiative; ‘stripped_cell_line_name’ is the name of the cell line in computer-friendly language; ‘CCLE_Name’ is the name of the cell line and corresponding tissue; ‘Mean’ is the mean prediction across 100 different runs; ‘Seed_1’–‘Seed_100’ represent the prediction of MTX IC50 value for each cell line. (XLSX) [file pcbi.1010180.s010.xlsx]

## Sheet: S9 Table
DepMap_ID	stripped_cell_line_name	CCLE_Name	Mean	seed_1	seed_10	seed_100	seed_11	seed_12	seed_13	seed_14	seed_15	seed_16	seed_17	seed_18	seed_19	seed_2	seed_20	seed_21	seed_22	seed_23	seed_24	seed_25	seed_26	seed_27	seed_28	seed_29	seed_3	seed_30	seed_31	seed_32	seed_33	seed_34	seed_35	seed_36	seed_37	seed_38	seed_39	seed_4	seed_40	seed_41	seed_42	seed_43	seed_44	seed_45	seed_46	seed_47	seed_48	seed_49	seed_5
ACH-000003	CACO2	CACO2_LARGE_INTESTINE	3.49391	1.79382	4.86459	3.05105	1.66326	5.61472	3.41991	2.53189	3.5404	2.69156	2.39166	4.31274	6.60075	4.76997	3.10748	1.61801	2.97038	2.88326	1.72196	9.50302	2.02288	3.47163	3.90748	4.46053	3.30085	5.75011	3.03313	2.38279	2.4487	5.19965	3.65108	3.93829	2.75878	4.25783	2.92359	4.24314	4.46374	4.22056	5.34015	2.47755	5.37292	2.89236	3.13026	2.62622	5.36696	2.53436	2.15695
ACH-000005	HEL9217	HEL9217_HAEMATOPOIETIC_AND_LYMPHOID_TISSUE	0.137857	0.0681711	0.144348	0.188805	0.237694	0.234735	0.0631494	0.207074	0.131439	0.0594303	0.112976	0.112844	0.187275	0.115278	0.0765529	0.283057	0.16218	0.10088	0.0552682	0.142339	0.0577934	0.0756129	0.188582	0.0859529	0.0537632	0.0935361	0.0958339	0.117016	0.0936693	0.169391	0.0658968	0.119144	0.136199	0.102783	0.0956178	0.286151	0.0891384	0.107128	0.172145	0.127343	0.166604	0.0820257	0.143665	0.0850871	0.0892532	0.0610931	0.183767
ACH-000010	NCIH2077	NCIH2077_LUNG	1.05399	1.21621	0.765961	0.444333	1.17624	1.05662	0.725193	1.2043	1.06223	0.685229	0.996377	1.72544	1.36541	0.596815	1.16425	1.49908	0.4497	0.773394	0.834012	1.08641	1.04032	1.14577	1.24515	1.83991	0.377503	1.64379	0.839249	2.11835	0.501335	1.76172	0.964521	1.03238	0.728448	1.20224	1.07755	1.44179	0.966821	1.52272	1.52264	0.748928	0.931048	1.00047	1.72667	0.844427	0.590014	0.540528	0.554029
ACH-000011	253J	253J_URINARY_TRACT	1.61666	1.55414	0.767357	1.46332	2.21062	2.99269	0.551836	1.19989	1.24063	2.20089	1.04982	2.23506	1.52657	1.15829	2.69042	1.00894	1.10045	0.558743	1.24249	1.48169	1.41671	1.05983	2.12424	1.84772	1.20101	1.38945	1.31302	2.21494	1.22454	1.95023	1.13067	0.766746	2.18614	0.96641	1.68626	1.56023	3.98359	1.53359	1.96134	1.19579	4.07693	2.12062	0.43338	1.29527	2.2947	1.36241	0.754232
ACH-000013	ONCODG1	ONCODG1_OVARY	2.47095	3.49615	2.08217	1.4687	1.14747	1.70248	1.12273	1.88308	2.13209	1.7743	1.11086	2.15743	2.78472	1.58193	3.47315	1.95105	1.82552	2.85368	1.46406	3.49408	5.70786	1.72686	2.27575	2.96776	2.20572	2.50874	2.00758	2.55087	2.37058	1.84426	2.58831	5.31961	2.77088	3.60036	1.34492	2.63345	1.99897	2.58169	2.66879	2.73176	2.26805	1.9603	2.33258	2.0744	3.6285	1.93382	4.89773
ACH-000014	HS294T	HS294T_SKIN	3.11361	2.89553	1.63889	4.2446	2.169	2.14147	3.64714	3.87603	3.7132	3.42194	3.07545	4.13073	1.57173	5.31936	3.00029	3.09752	1.75741	2.24577	1.47762	2.50429	3.26759	2.59118	4.55999	2.80491	3.68925	2.99802	5.12213	3.15814	3.96826	2.95299	2.51241	3.25466	6.40124	1.56239	2.7474	1.98104	2.13091	3.096	4.38733	2.5053	4.46317	4.44739	2.72164	3.82949	3.9562	2.33848	4.79422
ACH-000016	SLR21	SLR21_KIDNEY	2.79039	2.73304	3.81334	4.01597	1.70679	2.50689	0.598387	1.43436	2.99479	2.38503	3.77628	4.03619	3.48907	1.53507	3.67682	1.64765	1.66807	2.77208	1.9298	4.64683	2.26232	4.22822	1.81883	3.24658	2.99093	2.67742	1.95636	4.3233	1.7326	3.90917	2.10087	1.71006	2.76985	1.9654	2.60776	2.82166	6.54521	2.13265	2.82389	1.76534	2.11933	1.77403	0.761523	2.46997	2.74833	1.95828	1.98961
ACH-000017	SKBR3	SKBR3_BREAST	2.06968	1.57959	1.03162	1.41372	4.25275	1.25233	2.10305	1.98871	1.4239	0.923501	2.82123	1.76322	1.78539	0.97634	2.025	4.8635	2.49949	1.11572	3.80355	4.35567	2.29461	2.5269	2.45095	1.6647	1.13105	1.3008	2.5239	2.09517	1.63055	3.00576	0.685477	1.97344	1.8389	1.32	2.27119	1.57588	3.5139	2.11954	1.13103	1.26801	1.6123	4.44639	1.85213	1.79023	3.63714	2.66476	1.07727
ACH-000022	PATU8988S	PATU8988S_PANCREAS	3.81628	2.63377	3.08833	3.41201	3.04009	4.34476	3.25823	2.08765	3.7099	3.83363	3.42615	4.94612	3.16199	3.27577	3.49327	2.25668	6.46131	2.08344	3.45148	4.0701	4.27721	3.47295	3.57974	2.45898	1.57358	3.63819	3.55979	3.20432	3.05432	6.63699	3.77278	2.49752	10.219	3.64127	2.58085	4.25049	6.9088	5.77844	4.22349	2.50973	8.01701	7.72783	1.76172	2.16891	4.97548	1.58572	2.80165
ACH-000025	CH157MN	CH157MN_CENTRAL_NERVOUS_SYSTEM	1.55176	0.871748	1.47077	1.86782	1.17332	2.16443	2.43486	1.47608	1.16042	2.53553	1.32499	0.970469	1.52608	1.42911	2.64252	1.50051	2.18525	1.45176	1.33055	0.691204	1.33963	1.12153	1.12849	1.59233	1.46326	1.18921	1.77202	1.32504	1.26217	1.11514	1.13958	1.47279	0.643394	2.28693	2.19558	1.99473	1.10647	1.38872	1.34356	1.53381	1.84911	1.43763	1.63624	0.92242	1.31925	2.74987	1.75751
ACH-000026	253JBV	253JBV_URINARY_TRACT	1.14165	0.922575	0.848485	0.694568	2.53927	2.28688	0.610367	1.50706	1.2473	1.04561	1.00839	1.18034	0.805236	0.618674	1.09241	1.57277	1.25147	1.06945	0.835603	1.94491	0.954042	0.800748	0.555807	1.41106	1.04217	0.666079	0.806996	1.62239	0.732907	1.37324	0.912517	0.648764	1.31824	1.17094	1.01722	1.34709	3.26343	1.84202	1.62789	0.585968	1.93715	1.67254	0.400788	0.91854	1.24076	0.516268	0.909249
ACH-000027	GOS3	GOS3_CENTRAL_NERVOUS_SYSTEM	3.7904	3.60687	3.55035	2.52752	1.23606	3.67547	3.18135	3.09473	3.2578	2.37444	4.99396	6.06947	4.72064	3.88173	2.19622	2.76112	3.00198	4.4003	5.63944	6.75822	3.57417	2.87138	6.33639	1.99564	2.80422	2.06933	7.24355	2.734	4.60589	4.91332	2.63695	5.38418	1.58915	3.59919	2.91998	3.02526	3.33594	2.09388	3.34798	3.11991	3.72695	1.66636	3.34237	3.68704	5.43739	13.0792	10.538
ACH-000028	KPL1	KPL1_BREAST	4.15871	1.88338	2.52068	3.84322	3.74933	6.48273	1.28486	4.95713	2.73084	3.3209	5.9935	4.88509	4.55044	3.84798	6.75486	7.3476	3.23288	5.04669	8.21904	5.00955	1.12116	3.46398	4.60944	3.82454	2.7368	2.73803	6.08058	5.33709	3.58523	4.65519	4.7386	5.29856	4.4072	2.23936	5.07453	2.47969	3.7742	4.92482	3.59278	1.93102	2.00395	3.28419	4.80843	3.26155	2.33411	2.72458	3.97935
ACH-000029	HCC827GR5	HCC827GR5_LUNG	3.96052	2.81815	11.9665	2.1673	1.75007	2.72194	3.81858	5.56627	4.00817	8.13048	1.90239	5.02087	3.04749	3.24529	1.94395	2.36231	1.74608	9.2868	2.70223	2.00631	7.10052	5.30097	2.40831	5.27921	3.47518	6.47472	3.65245	2.28465	5.51179	2.58419	3.31634	3.36468	4.15654	3.65444	1.77256	2.29684	2.41326	1.68057	2.46154	4.64879	2.38031	2.39353	2.25971	12.6704	5.41709	2.73745	6.97893
ACH-000031	PANC0213	PANC0213_PANCREAS	3.76706	5.57719	5.21667	2.94461	2.59381	4.23139	3.46744	3.59717	1.41504	3.47393	2.71728	2.26769	8.54006	2.22816	4.03325	2.79448	4.14451	3.51745	2.02877	4.31246	3.81769	1.87256	4.88152	2.96579	6.4709	5.09212	4.00849	2.0592	2.99075	2.59732	0.983854	3.6754	6.74266	2.69294	4.53484	4.23192	2.87424	2.82863	4.09858	2.34759	3.63031	3.38096	5.14848	2.8301	3.76564	7.03707	2.38198
ACH-000032	MHHCALL3	MHHCALL3_HAEMATOPOIETIC_AND_LYMPHOID_TISSUE	0.161702	0.161056	0.189584	0.329803	0.127631	0.130604	0.240527	0.0796173	0.109644	0.263459	0.10487	0.105139	0.118032	0.135502	0.0895792	0.0603528	0.232201	0.488675	0.119945	0.193796	0.298492	0.229226	0.091111	0.0902432	0.536447	0.0831251	0.181194	0.234087	0.32786	0.21668	0.219044	0.195287	0.14031	0.111133	0.327033	0.169352	0.0696477	0.203186	0.149059	0.136419	0.16992	0.109858	0.0564165	0.164592	0.238567	0.247067	0.346122
ACH-000033	NCIH1819	NCIH1819_LUNG	7.02858	5.32543	6.3479	12.6517	3.87673	6.74072	4.80276	5.51582	6.52283	6.75525	5.57187	11.0135	12.003	4.32695	6.42632	4.07571	3.84097	12.248	6.60366	4.83391	3.43994	7.86045	8.55233	7.61674	5.5083	8.3567	5.46827	10.6535	5.0123	5.44673	11.651	12.0794	6.8157	3.7937	12.143	7.68919	4.34487	1.41007	16.0159	12.7113	2.34543	4.62781	6.62982	9.02024	9.23387	3.07413	6.00425
ACH-000034	PLB985	PLB985_HAEMATOPOIETIC_AND_LYMPHOID_TISSUE	0.0695468	0.0507174	0.0320867	0.0360785	0.0343825	0.0499484	0.147389	0.0331203	0.122543	0.0858797	0.0715024	0.102754	0.118657	0.106445	0.122679	0.0905817	0.0344214	0.0318165	0.0339268	0.0387853	0.180099	0.0419295	0.0275241	0.329978	0.0327087	0.0630554	0.0330397	0.108642	0.0313093	0.0389401	0.0406353	0.051366	0.120386	0.0790487	0.0361847	0.0562415	0.0427549	0.0450988	0.155438	0.066157	0.0877151	0.107265	0.0829415	0.0477203	0.0748234	0.125517	0.0532004
ACH-000036	U343	U343_CENTRAL_NERVOUS_SYSTEM	2.70754	1.8513	2.22506	1.9749	3.62603	3.86121	1.8257	1.9726	2.51338	3.88571	1.62788	2.66762	2.19148	3.35657	3.43738	6.66784	1.87598	2.0695	1.77648	1.4299	1.16425	1.60784	4.20554	1.43755	3.04347	3.86272	5.04011	3.20788	2.93082	3.88749	2.61999	2.04546	1.89239	2.15876	3.04243	2.83255	5.55705	2.84862	4.89802	2.74708	3.2076	3.11854	2.28371	1.8918	1.62858	2.9949	4.56152
ACH-000037	S117	S117_THYROID	3.4202	2.47149	2.14618	1.60057	6.89414	5.43331	2.93987	3.06513	2.86883	5.50243	1.35776	4.41921	2.92486	1.33513	1.92046	2.25759	1.79205	6.18951	1.50383	1.97847	2.31438	1.7982	3.15713	2.92723	2.2848	5.00938	1.34396	4.36286	3.54568	2.91744	2.01232	3.04124	6.00607	2.20191	2.14696	5.83628	6.15767	3.71696	5.64359	2.86225	2.85483	5.58634	5.25068	2.16416	2.18326	2.53707	3.63037
ACH-000039	SKNMC	SKNMC_BONE	0.670521	0.998692	0.676282	1.11947	0.262863	0.537482	1.09703	0.287597	0.589969	0.836908	0.410374	0.404294	1.56509	0.651104	0.666111	0.380011	0.215341	1.24428	1.048	0.451467	0.335007	0.515176	0.501526	1.29086	0.702949	0.578886	1.16086	0.746113	0.562014	0.693872	0.527423	0.959706	0.608327	0.527666	1.02126	0.514325	0.260568	0.571913	0.4815	1.31115	0.667926	0.486728	0.571431	0.391565	0.935551	0.686555	0.810158
ACH-000041	RDES	RDES_BONE	0.862845	1.06387	1.23936	1.00912	0.396942	0.652859	0.744717	0.77897	0.352543	0.698097	0.41665	0.68323	0.781105	1.13857	0.420926	0.478309	0.721781	2.44948	0.845413	0.40155	0.359611	0.663325	0.799122	1.20413	0.32635	0.925828	0.855645	1.22408	0.764885	0.949421	0.894969	0.630795	0.756153	0.758508	0.930125	1.9887	0.438846	0.664045	0.683581	1.09066	0.357618	0.649084	1.07743	0.909425	0.858752	0.517643	1.2563
ACH-000043	HS895T	HS895T_FIBROBLAST	5.60516	3.31159	3.73633	6.87421	7.21463	2.52714	4.27607	4.2522	8.64692	9.94343	4.08203	3.76451	4.91697	11.9962	5.46856	1.68017	7.57154	4.8473	5.98058	4.2803	3.90213	7.16535	4.65231	1.66946	7.25462	6.12911	9.28414	2.88076	9.01961	7.2628	7.24357	3.77773	5.36279	2.67055	4.66078	5.71238	2.92618	10.0043	3.22951	4.77568	9.46293	3.19961	2.58465	3.86477	4.66761	8.83375	11.4103
ACH-000044	MDAMB134VI	MDAMB134VI_BREAST	3.68538	1.17559	3.22392	6.78488	6.36779	4.40555	1.15899	11.342	3.74529	2.6329	2.92467	3.38256	1.46626	5.44443	2.83965	1.57343	5.24114	4.17981	10.0047	2.33209	2.08432	5.8449	2.0096	2.24544	5.35082	2.55904	3.63216	3.14001	3.50468	2.83591	4.58675	2.26776	4.86305	2.02027	2.91779	5.41645	5.855	5.07397	3.99521	2.12122	8.64654	5.51085	2.09084	3.20823	1.44348	6.73284	7.89393
ACH-000049	HEKTE	HEKTE_KIDNEY	1.84645	1.48882	1.8014	1.83991	0.796574	1.37699	2.12839	1.69692	1.34548	2.26845	1.32204	1.33484	2.98405	2.1913	2.05324	1.60058	0.713591	1.64714	1.0311	2.99925	1.95094	1.97101	1.38254	3.12196	1.6515	1.33507	3.02296	1.20294	1.6062	1.06344	1.16972	2.70434	2.06612	2.3236	1.83514	1.07491	2.21589	1.64955	2.58823	0.984832	1.49012	1.69609	2.17991	1.41108	1.2452	1.7075	1.88148
ACH-000051	TE617T	TE617T_SOFT_TISSUE	2.35854	1.28428	1.20354	1.67295	3.58405	2.07745	2.35663	2.72224	2.48419	0.992242	4.40157	5.24929	1.70411	1.82306	1.33894	1.44915	1.54867	1.80002	5.64501	2.08491	2.62156	2.20092	4.3473	1.27426	1.3059	2.17414	2.8503	2.13329	2.94804	3.01381	1.66167	1.83242	1.88786	1.92433	1.61919	4.33774	4.19599	2.81384	1.73945	6.19725	4.24229	2.14875	1.77551	1.993	1.37328	3.38666	1.45563
ACH-000057	OPM1	OPM1_HAEMATOPOIETIC_AND_LYMPHOID_TISSUE	0.381853	0.1998	0.316088	1.03176	0.27399	0.436737	0.335745	0.255954	0.363826	0.416711	0.876427	0.267041	0.192422	0.839582	0.287709	0.103423	0.340027	0.151944	0.774755	0.514723	0.0405623	0.63215	0.260366	0.299307	0.560046	0.205543	0.809721	0.323558	0.522858	0.358351	0.248311	0.200141	0.113853	0.0618613	1.29769	0.41515	0.176173	0.406818	0.109903	0.386632	0.859972	0.464109	0.086188	0.952248	0.437021	0.547131	0.773201
ACH-000063	HS616T	HS616T_FIBROBLAST	7.17939	5.92022	6.71186	10.7675	4.72797	6.87546	5.53256	6.32443	8.2044	9.0023	9.70838	6.55695	5.48528	7.93251	5.29516	3.67074	6.58624	5.347	5.76527	8.28769	1.45599	3.15115	9.73271	3.18337	10.4676	6.74135	11.219	4.6054	13.4058	3.83762	9.48546	5.32212	10.5095	2.97083	8.0842	3.14016	9.72387	16.0085	3.98976	6.23687	8.689	3.03291	2.79758	8.67856	3.94306	12.8308	10.2298
ACH-000064	SALE	SALE_LUNG	1.64953	1.57483	1.83013	2.00176	1.25302	1.41294	1.12184	2.44925	0.516729	0.960657	1.63375	0.890608	3.07457	1.95166	1.07014	2.85362	2.57131	1.82867	1.86899	1.24819	1.94179	1.30769	1.34792	1.51325	1.50006	1.39318	1.69816	0.453106	2.96887	1.35376	1.07371	2.88376	1.77508	1.43506	1.85504	0.866657	0.913832	1.00874	0.719115	1.15281	1.77953	2.4264	2.98475	1.4954	1.27524	1.47612	1.08825
ACH-000066	HCC4006	HCC4006_LUNG	4.29098	1.97739	3.30307	4.09632	3.42089	3.49476	3.02213	4.09445	3.41889	4.79806	4.38197	3.67053	3.5488	3.83384	4.75585	3.89337	7.08891	4.78704	5.40763	3.90991	1.76329	4.73843	5.07058	3.14062	6.71271	3.54256	3.45997	3.15375	7.29768	2.26728	4.03437	3.82647	5.44933	3.61959	4.53471	1.89418	6.10552	6.87592	4.16605	4.55693	2.55488	3.71908	2.26205	5.09171	5.2213	4.43349	6.28705
ACH-000068	REC1	REC1_HAEMATOPOIETIC_AND_LYMPHOID_TISSUE	0.179448	0.17511	0.1911	0.096738	0.147783	0.139757	0.228524	0.151457	0.112984	0.0978792	0.238352	0.0515332	0.134461	0.185433	0.0433426	0.131038	0.417869	0.0504584	0.151851	0.0734464	0.148828	0.243703	0.147327	0.12257	0.290421	0.13105	0.247967	0.0862992	0.311523	0.253801	0.0764118	0.160684	0.11424	0.074659	0.0792508	0.335728	0.204509	0.392046	0.07753	0.127568	0.042003	0.132045	0.164992	0.444207	0.494934	0.546438	0.204186
ACH-000069	HS611T	HS611T_HAEMATOPOIETIC_AND_LYMPHOID_TISSUE	0.308885	0.210602	0.294086	0.350435	0.210321	0.386193	0.36293	0.496448	0.139555	0.460817	0.408433	0.236522	0.362367	0.275202	0.100238	0.115328	0.206693	0.346022	0.451582	0.239084	0.272083	0.290049	0.242595	0.247627	0.711502	0.250309	0.458867	0.244751	0.768837	0.293689	0.339013	0.300894	0.298424	0.0720356	0.686377	0.23971	0.352974	0.20116	0.213969	0.262787	0.33217	0.100535	0.328105	0.338035	0.247593	0.217274	0.255276
ACH-000071	HS706T	HS706T_BONE	5.05218	5.35971	3.73622	7.20849	4.01359	4.91011	3.11638	4.28408	4.41436	7.44376	3.11724	4.21036	3.10091	4.04261	1.35084	2.60752	6.01841	6.00025	7.81209	5.47334	1.91429	3.96139	6.20908	3.10463	9.14182	6.68075	5.30564	4.43419	18.3808	2.0748	3.75557	3.581	6.46239	6.57653	6.50104	3.64714	10.5877	16.967	2.35988	7.21523	7.07209	2.57894	3.22888	5.35064	3.82026	5.23465	3.30534
ACH-000075	U87MG	U87MG_CENTRAL_NERVOUS_SYSTEM	1.58275	1.38282	1.1835	1.03807	1.17063	1.30333	0.697796	1.2373	1.04631	1.99259	0.847211	2.36617	1.83025	1.22962	0.847298	2.66312	0.979153	0.947226	0.938202	0.726288	2.06431	1.14838	2.41276	2.26055	1.6214	3.34101	2.41777	0.879978	2.45584	1.44203	0.56375	1.62042	1.40974	1.23017	1.81574	2.28877	2.30781	0.824898	3.53231	0.757761	2.06949	1.20291	1.81175	1.4939	1.59843	1.30001	3.11475
ACH-000076	NCO2	NCO2_HAEMATOPOIETIC_AND_LYMPHOID_TISSUE	0.211704	0.201052	0.198738	0.240284	0.27076	0.119209	0.0880489	0.212142	0.188751	0.0864607	0.67903	0.232132	0.0930659	0.315709	0.151863	0.0661423	0.152421	0.149302	0.0955531	0.387624	0.226006	0.289944	0.247573	0.1145	0.127916	0.0828296	0.191703	0.207423	0.157625	0.175184	0.24051	0.253382	0.0925769	0.203078	0.192132	0.205282	0.152016	0.115791	0.288843	0.146846	0.256896	0.277012	0.368236	0.307972	0.202006	0.11428	0.388171
ACH-000077	MJ	MJ_HAEMATOPOIETIC_AND_LYMPHOID_TISSUE	0.138442	0.135996	0.120112	0.076679	0.112908	0.162193	0.112398	0.155111	0.162602	0.131621	0.146545	0.141389	0.20478	0.266888	0.054845	0.0537795	0.0565494	0.0512678	0.120805	0.421187	0.107189	0.136972	0.213314	0.0996497	0.219761	0.0758654	0.190681	0.103275	0.322797	0.209492	0.203846	0.0989317	0.10231	0.0631982	0.114043	0.126225	0.069279	0.158591	0.0738236	0.0461512	0.0841745	0.139032	0.0489831	0.168953	0.151484	0.116143	0.211464
ACH-000079	TE125T	TE125T_FIBROBLAST	5.45924	5.59175	3.92125	7.23782	4.06347	4.66436	3.68593	5.81454	8.6896	9.01381	2.21607	3.01866	2.8053	9.24241	3.88034	1.41935	6.57113	7.85152	6.95379	5.57895	1.24295	4.64025	4.27641	1.70791	4.81109	4.74053	7.70569	4.15089	16.2938	2.10211	8.32076	5.62798	10.2099	2.53335	4.36637	2.72516	5.66208	9.26649	3.94225	3.60902	6.98869	2.92473	3.09477	1.77514	2.49998	5.46993	11.3035
ACH-000080	BDCM	BDCM_HAEMATOPOIETIC_AND_LYMPHOID_TISSUE	0.257647	0.0797441	0.212663	0.118343	0.357608	0.461376	0.142288	0.31941	0.26998	0.375579	0.264807	0.144291	0.271457	0.309245	0.192609	0.458193	0.22271	0.223194	0.30654	0.200958	0.169785	0.162247	0.270392	0.198528	0.571672	0.244977	0.229637	0.305257	0.197607	0.347958	0.282745	0.237711	0.275286	0.105698	0.409608	0.290668	0.308321	0.252857	0.11366	0.140835	0.343722	0.371967	0.302718	0.208445	0.297963	0.370342	0.487462
ACH-000083	HS281T	HS281T_FIBROBLAST	6.08054	7.90781	5.94339	5.86733	3.173	4.19751	4.10693	4.16883	5.50956	9.81882	6.35493	5.55396	6.04455	8.31109	4.05539	3.23329	7.78153	3.65979	5.24586	8.90198	3.02709	5.753	7.18021	2.82339	8.77793	6.61591	14.3753	3.48725	12.3862	3.30425	6.45021	6.9292	2.33468	3.97343	6.90595	5.50742	8.03378	12.1364	5.79032	5.21462	9.45983	3.46543	4.37915	8.24439	3.49337	8.16568	10.3474
ACH-000084	MUTZ3	MUTZ3_HAEMATOPOIETIC_AND_LYMPHOID_TISSUE	0.160791	0.090082	0.0977141	0.0916241	0.076307	0.118134	0.123479	0.156015	0.100129	0.156554	0.112145	0.142952	0.143859	0.308323	0.0373399	0.120028	0.196224	0.0867082	0.0640888	0.131103	0.344238	0.0815724	0.186027	0.108714	0.112578	0.0922003	0.0977242	0.0545396	0.174196	0.0985719	0.0979905	0.377911	0.296231	0.0564969	0.0544489	0.160745	0.105489	0.135249	0.509047	0.062082	0.285972	0.18083	0.203031	0.187423	0.113969	0.0371837	0.219122
ACH-000085	T3M4	T3M4_PANCREAS	1.54275	2.67813	0.99049	1.65652	0.983873	1.02137	1.48031	1.42489	1.23455	1.23288	2.34249	0.961663	1.67035	1.11372	1.25039	1.25429	1.4384	1.54138	2.18549	1.34536	2.88943	1.93843	1.13959	0.654207	2.06855	0.700853	2.26213	1.05337	2.07159	1.83855	2.41046	2.30495	0.874708	3.18442	1.84393	0.74871	0.916148	1.01569	0.785323	1.73963	1.07279	0.828495	0.49017	1.49728	1.45638	3.57677	1.42133
ACH-000086	ACCMESO1	ACCMESO1_PLEURA	3.36581	2.88448	3.79438	1.54254	6.15784	4.81513	3.80559	3.99607	5.13511	1.75516	2.15893	2.11473	4.89358	7.47932	1.84948	1.78763	5.81664	5.46829	3.78053	3.4702	4.02933	6.51469	2.48607	2.19897	2.28283	2.01719	1.46698	2.64822	4.11882	6.69943	1.45552	2.73851	6.50854	1.79344	1.95709	1.96383	4.71196	3.95114	8.02011	4.26217	6.83119	8.85423	2.48892	1.38874	4.80147	1.85379	2.69721
ACH-000088	HS172T	HS172T_FIBROBLAST	7.15944	4.11834	8.10017	13.205	7.07322	4.43282	7.82379	3.15585	8.04772	12.3785	2.31684	4.97626	11.2284	17.4545	16.8071	4.41893	8.04902	3.08453	6.2447	8.55437	4.95942	10.2341	6.42939	2.8394	2.7674	8.48273	5.31268	6.39265	4.85946	8.02951	6.02071	7.93314	15.1414	4.44176	6.96019	8.09888	5.56731	6.65073	4.05632	1.94102	13.8097	5.46186	1.80795	3.65125	8.59077	6.8401	9.69206
ACH-000089	NCIH684	NCIH684_LARGE_INTESTINE	2.3271	2.56293	1.93644	0.930424	1.21614	2.77043	2.41732	1.09989	1.14962	2.56502	2.35115	2.09162	2.14074	1.8365	2.30718	1.16134	2.6658	1.22084	3.20035	4.72523	4.08878	2.63517	1.29788	2.49954	3.52404	2.13326	3.35147	2.30903	2.32904	4.01286	2.93225	1.93715	1.77409	3.8579	2.39517	1.58965	3.6426	5.23107	0.870896	1.83594	1.67058	2.67963	1.03237	2.32085	2.741	1.84016	1.52241
ACH-000093	PANC0504	PANC0504_PANCREAS	2.57761	2.72252	2.80269	1.11921	1.24983	2.21336	2.42565	2.80519	3.6219	4.27128	2.18931	2.49112	1.4184	2.75794	2.20032	3.90838	2.09583	2.92477	1.22936	2.29279	2.28765	2.61293	2.37195	2.92075	3.00759	3.55643	2.04645	2.41125	2.54488	1.91599	2.61303	4.456	2.49386	3.33701	2.89747	2.41702	4.41656	3.65731	2.96416	1.08681	2.67554	2.83015	1.61936	3.09259	2.0038	1.73098	2.70792
ACH-000095	D341	D341MED_CENTRAL_NERVOUS_SYSTEM	0.5824	0.21482	0.435498	2.05805	0.545351	0.403648	0.679792	0.891101	0.219372	0.497309	0.260322	0.530098	0.667374	0.756431	0.372347	0.48739	0.251878	0.829701	0.335036	0.241888	0.222868	0.203362	0.476047	1.53908	0.59554	0.85096	0.520679	0.399285	0.742268	0.227566	0.290109	0.653158	0.586294	0.153865	0.603484	0.262438	0.263618	0.65803	0.334422	0.804339	0.599471	0.89896	0.623366	0.330825	0.327152	0.352877	0.52262
ACH-000097	ZR751	ZR751_BREAST	4.43729	2.10742	4.07477	10.5662	5.12429	7.37444	4.00333	7.10062	3.49597	5.90802	5.72264	2.43836	2.36742	3.69801	4.14401	5.57504	2.12213	5.49526	4.20854	2.9183	1.31425	4.17828	6.3627	3.9082	2.88389	3.6488	5.77744	6.18041	3.1385	2.54561	3.93439	3.61461	5.92295	1.66472	5.28785	2.64885	5.2692	5.59152	3.88401	5.62695	3.68961	5.42707	2.79622	4.9202	5.74034	3.05175	5.07863
ACH-000106	JVM2	JVM2_HAEMATOPOIETIC_AND_LYMPHOID_TISSUE	0.306325	0.117233	0.299607	0.0981697	0.306171	0.321462	0.21847	0.2801	0.200306	0.31524	0.270449	0.17915	0.604733	0.309459	0.178629	0.347236	0.179495	0.236588	0.492574	0.123563	0.302452	0.18966	0.223902	0.443685	0.297106	0.334733	0.144554	0.405697	0.63123	0.337352	0.204299	0.143198	0.306495	0.10734	0.397922	0.38652	0.462938	0.36623	0.0919615	0.139914	0.445985	0.365386	0.375009	0.392666	0.336765	0.3837	0.916028
ACH-000109	NCIH3255	NCIH3255_LUNG	5.92091	2.85426	6.12573	5.21398	5.53801	5.7961	6.44411	7.39526	3.35033	6.63951	6.03756	8.27337	8.81296	2.99539	4.01149	6.92612	2.66849	2.49272	8.20934	5.28934	6.03582	5.11255	11.8919	10.1844	8.08458	10.4761	6.29141	5.8026	13.1683	6.6755	4.59771	6.35486	5.45513	3.09221	10.0242	7.4136	7.91315	1.45774	4.06641	7.28477	3.85108	7.64715	5.86611	11.3816	10.6925	9.8738	8.54658
ACH-000110	NCCSTCK140	NCCSTCK140_STOMACH	3.97948	2.38764	3.14822	4.58621	1.00301	2.49803	3.78427	3.38037	3.59038	3.94682	6.15479	1.94699	1.71054	8.89852	4.19947	6.39444	3.37469	2.34557	1.69261	7.41736	1.28579	3.86932	1.75709	7.48308	6.63334	2.60751	7.50992	6.47672	5.14258	2.86704	4.6003	4.36266	1.92923	10.0491	6.19274	3.25077	3.48814	2.30428	1.6197	0.913329	7.13747	6.80171	1.11513	11.5811	4.6865	8.89791	5.67713
ACH-000112	SIGM5	SIGM5_HAEMATOPOIETIC_AND_LYMPHOID_TISSUE	0.0596287	0.0730295	0.0215404	0.0246795	0.0415204	0.0521205	0.119636	0.0404785	0.0776388	0.0859528	0.0636057	0.0933552	0.0589396	0.0552668	0.129221	0.0934655	0.0519	0.0185466	0.0493254	0.044447	0.113957	0.0505458	0.0590309	0.0965918	0.0466397	0.0526523	0.039625	0.0555819	0.0332539	0.0605687	0.0445622	0.0324367	0.0639787	0.0533157	0.0192674	0.0876147	0.0415894	0.100743	0.0629061	0.0502037	0.0722312	0.0625199	0.0751471	0.0367778	0.0673038	0.0359127	0.0354977
ACH-000119	HS863T	HS863T_FIBROBLAST	6.44597	5.40958	6.23924	4.87802	5.05289	6.02245	4.80252	4.05311	6.49068	11.851	8.14206	5.2654	5.5029	6.86815	5.96143	3.61835	10.5093	5.68389	10.707	4.5144	3.31772	6.61534	6.46489	2.78337	9.02007	5.54011	6.9845	4.33279	18.8808	5.13231	8.21065	5.52265	5.47689	3.71923	7.00842	3.62647	10.0955	19.2335	2.63696	10.7037	8.6433	2.63443	3.69289	5.9726	1.78659	7.59852	10.226
ACH-000122	SUPT11	SUPT11_HAEMATOPOIETIC_AND_LYMPHOID_TISSUE	0.302745	0.224659	0.170523	0.222542	0.441918	0.208883	0.1131	0.255472	0.322148	0.140926	0.248853	0.364616	0.538458	0.0873367	0.242342	0.108096	0.707325	0.193225	0.119607	0.609739	0.412643	0.414378	0.294194	0.0347011	0.275723	0.333359	0.55953	0.132247	0.359754	0.436886	0.0532404	0.269991	0.439104	0.26932	0.174698	0.573254	0.174132	0.169365	0.244111	0.127281	0.446647	0.278864	0.258422	0.33286	0.671294	0.13989	0.331995
ACH-000123	COV434	COV434_OVARY	1.94976	0.912521	0.656173	1.59302	1.9411	3.76511	1.32605	2.62583	1.67398	1.41036	1.76483	3.48493	1.29512	1.5755	1.69188	2.50707	1.88003	1.87195	2.43905	1.12044	0.860685	1.58863	1.57959	2.06815	0.608384	2.15219	1.29864	1.24955	1.1302	5.60915	1.06051	2.27592	1.95254	1.93192	1.03856	1.84902	3.1903	8.30889	1.39225	1.46548	1.05753	1.96532	1.66911	2.20231	0.917356	0.451479	3.20385
ACH-000125	TO175T	TO175T_FIBROBLAST	5.37494	5.07833	6.39236	6.61137	3.79986	4.4969	4.49997	4.25119	7.70956	3.4332	6.85094	5.30986	5.12995	4.85548	6.11262	3.91925	7.80196	3.90524	6.21699	4.30263	2.41686	4.89591	5.74849	2.28454	6.12211	4.65227	6.42934	4.2194	6.01135	4.33969	7.91875	3.60723	6.67947	2.1995	5.52778	3.30644	5.40991	9.55662	2.42851	5.27381	10.154	2.16345	2.00934	4.04435	2.15722	5.16983	7.54337
ACH-000126	KG1C	KG1C_CENTRAL_NERVOUS_SYSTEM	3.21623	4.9127	2.90553	3.18641	3.39221	4.74029	3.50155	2.11653	3.27851	4.03301	4.57069	4.13817	3.47941	3.57485	1.97348	4.79167	2.44832	1.68893	3.62257	3.18722	2.63004	1.3653	4.7848	3.5836	2.95901	2.65606	3.13688	3.38473	3.72397	2.07933	1.70253	3.2924	4.02278	3.83074	4.87455	1.85361	3.15308	1.81025	3.51703	2.04781	5.26268	3.17456	3.43719	2.97501	4.47687	7.89461	3.92496
ACH-000127	SLR20	SLR20_KIDNEY	1.84067	0.85595	1.94039	2.78046	2.83533	1.59103	0.82759	1.80369	1.06845	2.10694	1.66482	2.15404	2.45682	1.11472	1.77224	2.23877	3.04332	2.40876	2.45513	2.02828	1.39763	1.331	1.82324	1.50969	2.33257	2.03773	2.59158	1.01833	3.47129	1.46467	1.56203	2.27116	1.29579	0.722511	1.66286	3.12127	3.33128	3.2726	0.889446	1.72968	2.20201	1.01724	2.25783	1.48489	1.70251	2.88249	1.58254
ACH-000128	LN319	LN319_CENTRAL_NERVOUS_SYSTEM	2.42553	1.29854	2.9152	1.67166	3.61765	3.13241	1.45761	2.0087	1.70104	2.63119	1.17197	5.12904	4.93128	7.27779	2.80177	3.69833	2.80155	3.62689	2.01095	2.95134	0.79151	1.52046	2.64099	2.80257	2.26424	4.5272	1.13983	2.00974	1.70181	2.41333	1.23087	2.41812	1.50658	0.61262	2.61988	2.4665	2.11376	1.67742	4.12461	2.06982	1.83452	2.03942	2.02987	2.71214	1.61353	0.992673	2.54197
ACH-000130	NALM19	NALM19_HAEMATOPOIETIC_AND_LYMPHOID_TISSUE	0.0804948	0.0621085	0.0831192	0.183381	0.184671	0.103584	0.233379	0.0440929	0.153263	0.115168	0.05605	0.111257	0.1028	0.0897726	0.0793681	0.0771623	0.0810118	0.108399	0.0408672	0.0777641	0.117294	0.0518436	0.0769277	0.0922663	0.039671	0.077905	0.053805	0.18893	0.0794288	0.0694169	0.0853408	0.112554	0.102588	0.0312029	0.0322522	0.0344878	0.0485291	0.0800373	0.0688538	0.0713503	0.0557701	0.0565997	0.195698	0.0998625	0.0906095	0.052789	0.126393
ACH-000131	HS229T	HS229T_FIBROBLAST	3.49057	3.76801	4.10473	5.74725	3.99132	2.19829	2.42781	2.26757	4.16638	5.84288	3.13129	2.2872	3.86574	5.59943	3.4377	1.50853	4.3949	3.44568	2.73761	2.87887	3.77171	3.41015	2.79768	1.46267	4.20871	3.47503	2.59305	2.4737	4.29221	3.0724	5.25147	3.29251	3.7734	2.93703	3.03067	3.31939	3.05314	6.9497	3.667	2.95043	8.01756	2.08518	1.97184	2.65623	2.51301	3.68631	6.27527
ACH-000133	HS729	HS729_SOFT_TISSUE	4.31898	5.02481	3.33377	4.13379	4.35373	4.76852	3.08597	3.7245	3.04068	3.67642	6.16425	4.02264	5.86766	4.46711	6.10349	5.19152	5.98978	7.13605	2.54819	3.81121	2.92187	2.80408	4.07127	1.55107	4.5769	3.52166	4.88624	3.41437	3.4544	3.48967	3.6538	4.01373	5.38849	7.13054	4.56943	3.97583	2.58832	4.99482	3.87331	2.09707	3.69456	2.99075	3.46115	3.73376	1.84782	6.17061	3.66712
ACH-000134	HS274T	HS274T_FIBROBLAST	7.0556	2.8739	6.0822	10.7044	5.20688	8.60481	4.99192	7.34456	7.59152	4.85399	7.88321	9.69299	5.09905	7.59157	4.7478	1.69801	8.1592	3.93385	7.64992	9.39823	3.14555	7.31626	11.2271	3.05629	8.244	8.16352	17.4483	6.17263	9.44022	3.60404	5.28915	4.14073	9.80676	4.21794	7.18995	4.0376	7.16701	15.5873	2.62384	3.53448	7.51579	3.17687	3.70319	6.51916	2.36118	5.376	9.17637
ACH-000140	PFEIFFER	PFEIFFER_HAEMATOPOIETIC_AND_LYMPHOID_TISSUE	0.378638	0.382677	0.248794	0.176924	0.201467	0.497392	0.344324	0.398573	0.31412	0.404829	0.466851	0.389914	0.298197	0.444836	0.264661	0.137527	0.30108	0.140019	0.314251	0.600161	0.154917	0.385316	0.499052	0.0711548	0.519776	0.516011	0.994819	0.133299	0.971179	0.285353	0.589256	0.389732	0.32573	0.244621	0.304874	0.430461	0.302397	0.451109	0.0904587	0.119598	0.490417	0.313733	0.456009	0.423956	0.156988	0.425785	0.526327
ACH-000141	SNU308	SNU308_BILIARY_TRACT	2.4155	1.83753	2.15615	2.67179	2.10648	2.08324	1.22091	2.31955	1.73019	2.17607	2.58481	0.643918	3.07912	1.87847	2.3298	1.72619	5.26175	2.25765	2.05208	3.85607	3.23405	1.72429	1.19523	2.90141	3.68333	1.83284	1.78274	2.06127	2.03915	2.37052	2.0947	3.61033	3.60149	2.28254	3.05321	3.18787	2.42627	2.72243	2.14447	1.6665	3.70207	2.48589	0.648687	2.3556	2.31862	2.78106	2.80226
ACH-000143	HCC2429	HCC2429_LUNG	1.84452	0.578795	1.36683	4.05099	2.53917	0.586586	1.59406	2.23047	0.769196	0.876976	1.50903	1.45564	0.975903	1.98626	1.01447	1.08998	3.47163	0.832365	2.9539	1.80698	0.682783	1.34759	2.71977	0.354931	1.77854	1.23602	2.83571	0.618963	4.0547	1.70747	1.00049	2.01972	1.27706	1.04532	1.51425	2.18734	0.890189	0.747151	1.79868	1.68763	2.63666	2.20447	1.37991	1.40251	1.42585	1.35848	6.4001
ACH-000150	HCC2935	HCC2935_LUNG	5.53922	6.19413	4.42547	1.86175	4.82349	4.26701	6.82388	5.25205	4.87626	8.48039	4.73112	8.6393	8.38716	4.17027	3.22755	8.13736	3.97096	2.24928	5.96046	7.79387	4.1109	5.23617	8.87916	15.9564	3.67034	11.1825	5.78456	9.23945	7.26544	4.9732	5.45428	8.5894	4.14963	5.7454	6.31465	3.39014	5.37602	2.66415	3.87102	7.26727	1.59396	5.38655	4.2547	9.34931	5.5261	9.5133	3.57613
ACH-000152	M059K	M059K_CENTRAL_NERVOUS_SYSTEM	5.66986	6.08458	6.83127	4.44742	4.01566	5.78213	7.34542	4.14566	4.42829	8.98769	2.51072	4.71031	11.5619	6.3321	6.39216	2.82157	3.19493	1.67334	5.19647	6.00813	1.73745	5.04419	7.36985	5.12719	5.18298	6.57771	8.94845	5.38539	9.27524	4.50152	5.9876	6.41373	5.33646	7.51887	8.37832	2.45799	6.28591	5.14618	5.84753	5.10169	6.61547	7.25609	8.91516	4.47759	3.67929	9.01707	5.05224
ACH-000154	HS888T	HS888T_FIBROBLAST	4.79012	4.59255	6.49986	6.70135	6.0195	3.45306	3.61967	2.55412	4.67647	7.39917	5.49009	4.81092	4.36997	5.05559	5.7438	1.65315	5.4966	2.45954	4.14873	7.06362	3.52079	4.17621	6.30788	1.91869	5.66146	5.00008	6.65748	4.30269	3.6531	5.18552	5.95467	3.62833	4.44481	3.35229	4.25939	5.13086	5.55783	6.4559	3.78341	4.78801	9.71774	2.39452	1.57835	3.38683	2.54473	5.40512	7.61459
ACH-000156	MHHCALL4	MHHCALL4_HAEMATOPOIETIC_AND_LYMPHOID_TISSUE	0.116515	0.182351	0.0549282	0.1711	0.113492	0.0780798	0.219319	0.138571	0.0850219	0.120284	0.112916	0.0581329	0.0843941	0.0421781	0.0625189	0.0855997	0.137618	0.199912	0.128449	0.0955645	0.134398	0.123778	0.10843	0.0835309	0.179326	0.0598953	0.0879582	0.286862	0.318166	0.166512	0.143283	0.185405	0.105712	0.0334704	0.185305	0.045731	0.0735584	0.200152	0.0588527	0.146378	0.105009	0.0482854	0.0932564	0.111082	0.155426	0.0920686	0.190744
ACH-000158	OCILY3	OCILY3_HAEMATOPOIETIC_AND_LYMPHOID_TISSUE	0.138497	0.188322	0.0901985	0.0635559	0.155121	0.0763495	0.190338	0.141778	0.117073	0.12954	0.262685	0.0631138	0.230713	0.0583197	0.101079	0.103559	0.115608	0.080253	0.105044	0.130868	0.322704	0.159156	0.0691003	0.111559	0.0805519	0.216662	0.202122	0.190949	0.108535	0.120339	0.0871686	0.11739	0.0753632	0.0767414	0.0612621	0.327239	0.122134	0.0586952	0.120597	0.121229	0.0665817	0.0688507	0.29406	0.179869	0.0910056	0.108613	0.135417
ACH-000160	BT12	BT12_SOFT_TISSUE	1.64748	0.547776	1.6832	4.85879	1.38647	0.832176	1.65374	0.78526	1.66356	1.68155	0.910133	2.93779	0.775226	2.10407	0.807362	0.925902	1.24573	4.59392	1.83446	0.965863	2.50951	0.749357	1.85204	1.98764	1.9081	2.764	1.68461	1.08166	1.51175	1.21449	2.44607	1.19594	1.15733	0.860054	1.03325	0.956446	0.933676	2.23079	1.09846	3.24985	1.82354	1.07703	1.01433	0.631582	1.36083	2.17812	3.41024
ACH-000163	SW579	SW579_THYROID	1.43444	0.991927	1.17066	1.17879	1.58593	2.08159	1.57568	0.764798	0.503251	2.04496	1.42026	0.91362	1.33318	1.6911	2.31448	1.58726	1.8563	1.04964	1.73315	1.26089	1.21901	1.86652	1.56801	1.62982	1.25698	1.51876	1.53555	1.88624	1.29602	1.35954	1.83974	0.979798	0.947822	1.78174	1.89491	1.70551	1.50814	1.64283	0.965874	0.589335	1.31956	1.073	1.83116	1.36907	0.908548	1.01657	1.22516
ACH-000164	PANC1	PANC1_PANCREAS	2.66577	2.52102	3.13101	1.64462	6.09519	2.23222	2.72786	2.14965	2.66456	1.73908	1.32943	2.53544	3.11045	1.50309	3.47977	4.01502	4.08737	3.27492	2.34312	3.58053	3.60751	2.75412	3.22183	1.71107	2.15836	1.34578	1.83258	2.29319	1.21312	4.18052	2.45466	2.61413	2.51206	1.85595	2.45225	1.8655	1.57425	1.78589	2.34928	2.37364	4.25767	6.68017	5.86162	2.30116	6.09027	0.980411	2.75334
ACH-000165	HS751T	HS751T_FIBROBLAST	4.64913	4.33586	4.13332	6.61521	4.10801	4.25909	3.16188	2.11084	4.14935	6.3663	5.25009	5.03428	3.45902	4.36781	3.7102	3.12121	7.08261	3.59856	4.84443	6.09995	3.16382	4.79196	5.66546	2.29634	5.60472	4.46478	7.54277	3.98599	8.56578	2.68512	7.16459	3.68643	5.70993	4.01539	5.00225	2.41103	6.22146	16.2136	2.50157	4.51834	2.99138	1.97653	2.82512	2.10645	1.85695	4.66074	7.25735
ACH-000166	KASUMI6	KASUMI6_HAEMATOPOIETIC_AND_LYMPHOID_TISSUE	0.218912	0.0717437	0.0943674	0.270789	0.153252	0.136197	0.197053	0.105693	0.0810385	0.384011	0.154996	0.259589	0.340242	0.30743	0.0733417	0.231715	0.327389	0.088796	0.0922116	0.270423	0.516445	0.0652646	0.187182	0.348201	0.21747	0.351808	0.128438	0.142653	0.259491	0.0791192	0.231395	0.471831	0.394087	0.158201	0.0925116	0.152352	0.141374	0.139548	0.44234	0.241592	0.16072	0.264321	0.370419	0.233101	0.0811485	0.132222	0.213676
ACH-000167	KE97	KE97_STOMACH	0.106752	0.0601443	0.0793103	0.132119	0.0787103	0.0512644	0.191918	0.120359	0.0521492	0.145179	0.151585	0.116901	0.15379	0.128285	0.175524	0.141827	0.0432341	0.132455	0.127605	0.18212	0.195796	0.130792	0.0849116	0.17202	0.112663	0.0679112	0.136458	0.174432	0.08724	0.0446315	0.125552	0.0821155	0.10779	0.0693815	0.0520828	0.19457	0.071563	0.0495415	0.0741958	0.0695686	0.269342	0.198766	0.0640657	0.154055	0.242991	0.159491	0.0795759
ACH-000170	PRECLH	PRECLH_PROSTATE	1.09902	1.88626	1.55471	2.33788	1.28199	0.536584	1.06383	2.28131	0.388327	0.796921	0.885801	0.248541	1.39907	0.568027	0.734266	1.38063	2.29789	1.92108	0.527085	0.943446	1.68443	0.99861	0.654274	0.898219	0.889347	0.710082	0.811559	0.417755	1.00509	0.504825	0.54228	1.78651	1.38061	1.7827	0.863152	0.893739	0.928637	0.947367	1.0797	1.07758	1.35724	1.04282	1.11238	1.01179	0.790314	0.339337	0.924324
ACH-000172	TM87	TM87_SOFT_TISSUE	2.20194	2.11723	1.80737	1.19888	3.35573	2.84923	1.24552	2.97514	3.60255	1.05539	1.28751	8.09566	0.996468	2.01544	1.94112	0.725812	2.02155	1.18879	1.65438	2.72684	3.41445	2.06487	2.90077	1.9755	1.95285	3.86903	1.89408	2.27902	0.923543	1.91894	1.26586	0.802127	1.41974	1.92556	1.59961	8.16078	4.73772	2.36432	3.05944	1.36727	3.31353	1.82553	2.25556	1.95729	0.87849	1.28128	2.96748
ACH-000173	JHUEM3	JHUEM3_ENDOMETRIUM	3.48201	5.97037	5.54031	2.20337	3.19797	2.47218	1.32007	3.62626	2.49313	3.44545	4.55599	1.8869	6.80919	2.50828	4.73668	2.18789	2.98365	4.26565	2.17652	5.23688	4.99929	6.41716	1.79525	5.00048	3.43939	3.58405	3.0649	4.04825	2.77198	2.08148	1.75506	3.7633	3.51111	3.30526	3.45176	2.35814	7.24148	3.42865	3.40369	1.40139	2.18273	2.44338	1.89968	3.72581	2.6269	2.59397	2.59546
ACH-000175	TE159T	TE159T_FIBROBLAST	7.57948	5.64947	8.74799	4.41776	7.72395	11.7103	6.19569	4.52405	7.64851	10.3975	5.15276	7.2074	7.89968	13.5969	6.20516	5.41819	10.0261	6.04286	8.73656	9.01795	5.39051	8.67094	5.2618	3.99179	6.69854	3.85772	11.9271	6.32314	11.3388	7.61297	9.14185	5.41061	7.62715	4.8255	9.28715	3.07187	8.11813	11.139	4.84794	7.11815	7.80838	4.12997	5.04998	4.95474	5.3968	8.69764	12.4761
ACH-000176	LOUNH91	LOUNH91_LUNG	4.14631	3.81072	3.4916	3.81827	11.2444	3.93362	5.31445	4.06894	2.90283	3.24193	5.50025	3.38161	4.48307	2.73658	3.71081	3.64832	5.18024	3.6562	3.49934	3.50479	6.56933	6.72221	7.88034	1.79601	5.20866	2.87747	3.97731	2.9437	7.91557	6.2813	3.1556	5.06091	3.91946	3.67611	5.05171	3.357	5.43057	2.99305	2.85734	7.72749	1.99138	4.1035	1.25566	3.80859	6.84553	6.60801	2.95058
ACH-000177	NCIH660	NCIH660_PROSTATE	2.98199	2.32919	2.91921	4.65766	2.89879	1.706	2.21517	3.96061	3.7944	1.77805	3.83433	4.07384	2.47295	2.85969	1.52859	1.26469	3.56016	2.9741	2.47875	3.28592	1.90869	2.7102	2.70397	1.45288	3.25281	2.12299	3.63518	2.45527	1.68959	1.99484	1.91856	2.78841	4.25743	3.43626	3.84614	2.60564	3.2487	2.5612	2.85981	2.44502	5.69543	4.40762	2.25046	2.31521	2.56909	5.19607	1.51501
ACH-000179	NCIH1618	NCIH1618_LUNG	1.59046	1.02886	1.44188	1.42353	1.76461	1.24285	1.41127	1.20239	3.26471	1.11494	0.705878	3.12429	1.53488	2.88385	2.3564	1.35775	0.850005	1.43781	0.342133	0.59296	0.767033	0.641895	1.62739	1.85514	2.07158	2.80182	0.515349	1.47796	1.49051	2.25645	2.5217	1.27711	1.99135	1.75282	0.92582	1.24424	1.01599	0.813831	2.73631	1.66607	0.927287	1.19077	1.95807	0.90515	0.793513	1.92089	0.822405
ACH-000180	HS839T	HS839T_FIBROBLAST	6.05991	6.67242	6.17607	4.11294	4.3656	7.20514	3.29443	3.8291	4.92421	10.4132	6.82074	5.26425	3.94357	9.33754	4.38839	2.77579	10.5861	4.53385	8.34982	5.76724	5.33447	8.07631	5.74221	2.94107	9.52417	5.68113	7.91711	4.50216	11.0786	6.14956	9.32114	4.19827	1.79545	3.58612	6.53856	3.75014	6.97393	11.4722	2.81236	5.70004	8.25245	2.5297	3.16354	4.87894	2.50588	5.24841	11.3731
ACH-000182	SNU869	SNU869_BILIARY_TRACT	3.93486	2.56998	3.52514	2.27577	2.07859	5.20416	3.20344	4.44483	4.51072	5.67034	2.80074	3.37053	8.51086	6.64043	6.17792	5.57864	2.33852	4.91947	2.50169	1.06874	3.48514	3.89953	3.35234	8.91992	3.50282	4.48133	2.00502	11.0436	2.15762	2.07162	5.21087	4.96022	5.45608	3.08116	3.1425	2.23406	3.3423	6.30565	5.47761	2.1288	1.10768	2.09733	6.11736	2.53858	2.08104	4.12917	2.54953
ACH-000184	HS343T	HS343T_FIBROBLAST	4.44202	3.68027	5.27551	2.71092	4.48355	5.55503	3.77005	2.98188	4.2163	6.51025	3.57352	3.55582	4.06492	3.90266	4.1218	2.17265	7.46096	3.06015	3.81985	4.87637	3.80916	4.34078	3.75784	0.907816	3.33861	2.5916	6.25148	2.96592	6.94606	3.15275	6.2503	3.05306	3.71615	3.17823	4.88901	4.23042	4.84055	7.92067	2.22547	3.86442	6.74716	1.66502	3.34908	3.98192	2.76213	5.49246	7.59438
ACH-000185	HS737T	HS737T_FIBROBLAST	7.36886	7.66251	9.68777	8.53272	5.12377	5.05421	5.79721	5.78969	8.02883	9.85947	8.12058	8.13325	4.21321	8.53159	4.67634	5.10451	6.73337	4.81613	9.18792	8.38512	3.83715	7.31909	8.0497	4.57585	9.51503	7.78811	11.1106	5.61052	17.2182	1.20762	8.59631	8.70768	6.55935	6.86064	7.54246	3.69609	12.9095	13.3742	4.30025	8.64737	8.55572	4.63296	6.60725	4.50394	2.97894	10.1751	12.5048
ACH-000187	CORL311	CORL311_LUNG	0.301499	0.47555	0.389757	0.108687	0.492806	0.0785272	0.355518	0.204222	0.158449	0.17301	0.113962	0.403275	0.210522	0.237112	0.104081	0.888844	0.099979	0.4928	0.394173	0.106991	0.160182	0.263913	0.276413	0.726924	0.0665001	0.661369	0.180294	0.447544	0.205932	0.257199	0.449297	0.321395	0.415872	0.411631	0.136883	0.193624	0.313412	0.283241	0.309082	0.314159	0.157855	0.282991	0.209592	0.0691343	0.0781791	0.111077	0.14158
ACH-000194	HS934T	HS934T_FIBROBLAST	4.89514	4.72983	2.83886	4.09575	5.13647	6.1536	2.96708	3.57032	4.25683	7.65828	4.61763	3.88877	3.90258	5.61606	3.35621	2.94416	8.36848	3.84645	5.97151	5.83713	4.84704	7.15769	4.31881	2.30595	3.504	4.82732	6.86293	3.58407	9.31348	3.71853	7.2607	2.72387	2.72716	3.4361	5.25824	3.86148	6.0395	10.3959	2.07634	4.60045	8.26847	1.14388	3.47442	4.72865	1.30413	4.83106	8.02811
ACH-000195	SET2	SET2_HAEMATOPOIETIC_AND_LYMPHOID_TISSUE	0.410798	0.193404	0.391814	0.0900764	0.763941	0.403334	0.414134	0.107839	0.230006	0.51252	0.575475	0.530651	0.513064	0.227137	0.285924	0.225415	0.830578	0.158759	0.570015	0.240983	0.449362	0.174384	0.675928	0.228818	0.384727	0.476255	0.359424	0.926747	0.524051	0.627547	0.507932	0.220215	0.338405	0.49595	0.166927	0.511595	0.410874	0.307243	0.483502	0.369711	0.57403	0.31358	0.208743	0.310004	0.171041	0.688371	0.71116
ACH-000196	HCC1599	HCC1599_BREAST	2.58534	1.61649	3.19877	4.61047	4.44942	1.93508	0.888351	2.59122	1.30306	1.1628	2.26433	0.633366	8.43665	3.68316	3.46324	2.40051	4.71118	5.44436	2.964	3.3744	2.62502	5.32521	1.24241	1.61399	1.3967	1.33024	0.843375	1.71807	1.10636	4.33164	2.21594	5.79132	2.30858	1.18002	1.38392	3.40089	1.16834	1.38871	3.93037	1.53135	1.98623	2.6469	2.93602	2.03397	2.86208	1.18367	2.53562
ACH-000197	TALL1	TALL1_HAEMATOPOIETIC_AND_LYMPHOID_TISSUE	0.178078	0.161923	0.200429	0.233116	0.0767425	0.150385	0.0765223	0.0618476	0.110992	0.238526	0.198748	0.0816695	0.304001	0.0646468	0.0952824	0.0540335	0.251863	0.0983635	0.0635609	0.165478	0.140195	0.15869	0.160069	0.106392	0.211488	0.13035	0.232223	0.135751	0.161092	0.966208	0.16681	0.258868	0.293797	0.283024	0.149978	0.370214	0.0343818	0.0852895	0.219943	0.141993	0.117088	0.154076	0.0762586	0.149424	0.33437	0.255842	0.220018
ACH-000199	HS255T	HS255T_FIBROBLAST	6.00807	7.40042	7.25483	7.35696	6.93006	6.82176	3.68737	4.08886	7.96263	5.29462	3.63152	3.26535	7.79234	12.9508	4.52036	4.34649	3.19711	3.73372	3.073	6.46751	4.79598	3.96216	5.70614	3.96201	6.40702	8.42965	8.94225	4.76471	4.38073	7.61107	8.23113	4.04994	6.56213	3.68813	5.08116	6.40424	6.50117	5.58791	3.19244	2.85803	4.22725	3.35341	5.55093	4.16293	5.6139	10.9991	6.90506
ACH-000202	COLO320	COLO320_LARGE_INTESTINE	0.615821	1.45889	0.519714	0.759219	0.499639	0.191191	0.904288	0.602043	0.687841	0.62764	0.334698	0.672386	0.724931	0.680375	0.894702	0.578813	0.224276	0.421768	0.489912	0.291341	0.534807	0.353772	0.468353	1.16122	0.651369	0.855113	0.932489	0.652282	0.743025	0.17873	0.431381	0.721758	0.419342	0.700278	0.7185	0.355477	0.557717	0.547585	0.401141	0.953304	0.359953	0.621113	0.512134	0.825464	0.724834	0.430137	0.415501
ACH-000203	NH6	NH6_AUTONOMIC_GANGLIA	1.39424	1.10228	1.63223	1.46009	1.75333	0.954203	1.1221	2.51124	0.872088	1.10763	0.967983	0.971724	1.28271	2.76725	0.218991	1.80121	2.92478	1.2563	1.4872	1.68042	1.51326	1.70569	1.6315	0.748191	0.850305	1.45667	1.78713	0.744807	2.53902	1.0407	0.787771	1.7093	1.74314	1.75853	1.58919	1.26874	0.966301	2.80721	1.11325	0.84658	2.35722	0.972363	0.73847	1.07196	0.728041	1.1407	3.57729
ACH-000205	PK59	PK59_PANCREAS	4.21483	3.09296	3.72108	1.50816	3.39731	5.14823	3.85045	6.60981	5.33939	4.60343	5.36096	4.11447	1.5828	4.05871	4.95997	3.11322	7.48943	4.14966	3.98347	2.10657	3.99799	3.08098	4.22588	3.57361	5.89275	3.1688	3.34556	2.54264	3.34662	5.49146	6.06586	2.1589	4.10766	3.8957	2.10213	5.00212	4.46295	5.30746	2.30995	2.02627	4.56354	2.64565	1.97505	3.6886	2.16004	4.2767	4.4703
ACH-000206	C8166	C8166_HAEMATOPOIETIC_AND_LYMPHOID_TISSUE	0.267944	0.148091	0.292004	0.120043	0.151221	0.209054	0.1121	0.259256	0.477241	0.177304	0.199264	0.351153	0.120394	0.986279	0.195868	0.650954	0.484351	0.0733974	0.227557	0.52636	0.315529	0.266037	0.243805	0.405208	0.531502	0.18214	0.267853	0.278514	0.62453	0.563186	0.135767	0.369251	0.0597812	0.0443117	0.282129	0.297314	0.140557	0.309726	0.100175	0.116328	0.401719	0.0973697	0.0671307	0.396598	0.310822	0.154263	0.879324
ACH-000208	U178	U178_CENTRAL_NERVOUS_SYSTEM	3.06942	1.71645	2.55341	2.3578	3.63441	5.59311	2.36246	3.35975	2.191	4.20706	1.44172	3.62852	5.15286	3.79933	2.61939	7.06178	1.66599	1.92731	1.94992	1.31663	2.91379	3.06029	5.90819	3.39727	4.43087	4.29879	4.27625	1.83939	2.48356	2.36609	2.55236	6.3118	1.35288	2.68431	4.75072	3.61736	2.81846	2.66244	3.67333	1.96322	4.5869	4.35528	3.21526	4.38459	2.45759	3.27784	2.92725
ACH-000209	SNU1079	SNU1079_BILIARY_TRACT	3.60947	3.87752	2.71723	2.76908	3.09309	2.81647	2.41669	3.45649	2.80228	3.49107	6.14864	3.16623	2.55954	1.97892	3.77834	2.90478	2.68191	4.70093	3.76557	2.02154	1.39356	4.72892	4.62973	5.25541	4.38046	3.70761	2.00885	5.47088	2.63096	3.0969	4.43158	2.86325	5.56345	2.9942	3.01801	1.47505	5.10012	6.56147	2.55742	3.70183	1.37788	1.86964	1.2389	6.32765	7.79734	1.34771	2.25886
ACH-000214	HS675T	HS675T_FIBROBLAST	5.29236	3.79347	5.57999	7.04375	6.48188	5.69539	5.47919	3.64915	6.61907	5.46709	5.70018	4.34846	8.29548	11.153	5.88903	3.65289	4.8773	2.43203	3.61612	5.44616	6.42537	4.63291	4.73836	2.82086	4.75509	6.09976	3.21911	3.84571	4.99531	7.10106	5.07129	3.13005	7.1328	3.30207	2.46964	3.70976	8.49205	6.99262	2.2438	1.95455	3.95714	3.68534	4.7472	4.41917	10.9739	4.91364	5.81345
ACH-000215	LN382	LN382_CENTRAL_NERVOUS_SYSTEM	3.05949	2.74152	2.37122	2.062	2.68825	3.58545	2.05814	2.33609	3.37289	3.35254	2.98727	4.7134	4.67398	5.29598	2.42046	6.30377	2.1701	2.60071	4.17666	3.92203	2.14194	2.33259	3.06362	3.47477	3.67891	5.58758	2.78398	3.60846	2.67358	2.25285	3.09002	2.97019	2.80508	1.362	3.51091	4.11654	4.22194	1.55119	5.33867	3.5856	2.75908	3.63175	3.73136	2.31947	2.07754	4.00681	4.57367
ACH-000216	JHESOAD1	JHESOAD1_OESOPHAGUS	3.25968	0.641324	3.1515	3.77684	1.29109	2.68591	2.18047	3.45894	3.24801	3.22017	1.68048	4.85749	5.20869	4.19888	1.59035	3.10859	2.0578	7.17557	3.71114	2.90262	2.10475	3.0212	3.48789	5.32009	3.0761	4.83884	2.96579	4.02925	3.40745	1.71153	5.41874	6.28987	3.12533	4.17952	2.64748	2.94893	2.5901	3.13693	3.75273	3.12018	2.47895	3.86899	4.2796	3.10207	2.37382	3.93943	3.27958
ACH-000220	MINO	MINO_HAEMATOPOIETIC_AND_LYMPHOID_TISSUE	0.205471	0.234368	0.144495	0.458317	0.368738	0.210557	0.127515	0.153762	0.0578085	0.297029	0.293834	0.230474	0.225014	0.124754	0.138923	0.0589324	0.223089	0.286998	0.118599	0.106992	0.176163	0.211548	0.21558	0.153102	0.182401	0.23893	0.224663	0.35248	0.19876	0.165326	0.158167	0.1842	0.301125	0.0535956	0.164287	0.234646	0.13365	0.212417	0.185539	0.183778	0.262664	0.125913	0.144776	0.278153	0.255699	0.284914	0.203704
ACH-000224	HS819T	HS819T_FIBROBLAST	7.58692	3.8497	9.90669	8.631	5.89859	7.84729	4.95358	5.4397	9.42164	9.82598	8.59993	7.75891	5.09926	9.81227	4.65591	4.46558	10.0037	3.17268	8.86694	5.85583	5.8637	6.6633	8.08491	2.83854	14.1308	6.37582	16.1922	3.91725	20.7139	4.63113	12.6497	5.21856	4.26997	5.33485	9.75169	3.3441	4.30532	10.6708	2.70916	6.61377	9.96474	2.99041	5.50945	8.53825	3.14936	12.4961	14.4155
ACH-000225	ECC12	ECC12_STOMACH	0.957778	0.48013	0.690532	0.329518	0.513119	0.743685	0.255248	1.13072	0.242491	1.01609	0.68273	0.367197	0.387915	0.255214	0.50208	1.48468	0.593718	1.02675	0.70334	1.59372	0.755403	0.761392	0.413148	1.35715	0.811004	0.324616	1.84113	1.10584	0.925444	0.481739	0.632006	0.585467	0.762239	0.181541	0.715038	1.50671	1.31461	1.33993	0.74698	0.793122	3.95174	2.23616	0.720407	1.03535	0.729239	0.78318	0.708679
ACH-000228	BICR31	BICR31_UPPER_AERODIGESTIVE_TRACT	3.59636	4.7585	2.98613	1.43859	1.70685	3.2566	3.48086	3.40165	2.21728	3.16579	6.43812	1.56672	4.39657	3.46742	3.04424	4.24162	3.01183	2.22104	5.11548	6.73851	2.3006	5.18183	4.26439	4.41575	2.68416	2.99643	3.96422	4.63004	3.11798	2.46627	2.64209	4.38883	3.0589	5.43954	3.78695	3.07792	4.68825	2.91375	2.77882	2.82122	1.16678	1.81675	2.23247	4.52504	3.36855	1.80152	4.21589
ACH-000229	HS822T	HS822T_FIBROBLAST	8.53254	10.1971	8.59942	6.80724	5.31338	8.0637	6.25893	5.41572	11.0133	11.2498	7.86473	7.55095	4.75223	9.05361	5.16581	4.85868	8.44551	3.47067	10.3132	6.50594	4.84538	2.88175	9.97	3.7132	14.9703	8.72534	15.277	5.16083	27.1417	4.64675	12.2208	4.08085	7.68608	5.90942	8.90182	3.34899	14.8046	16.1837	3.28509	8.82935	10.1243	3.16385	4.97888	8.24614	4.09092	15.2228	12.7631
ACH-000230	HS742T	HS742T_FIBROBLAST	4.46003	2.32542	4.97836	4.97028	3.11669	4.37685	3.31539	2.94492	4.58574	5.37204	3.06951	4.45431	3.34592	3.48953	4.60521	2.48084	2.12628	1.5687	3.1945	7.03032	2.87998	3.53157	3.89113	1.74135	6.60607	4.24915	8.03941	2.6184	5.94472	3.70827	7.04512	3.03785	4.20465	2.5894	4.35063	2.54027	6.6594	8.13224	3.17024	3.02501	6.46951	1.9864	2.53262	4.38995	3.54855	7.5108	8.80009
ACH-000234	CAKI2	CAKI2_KIDNEY	2.37578	2.04423	2.46148	1.58153	3.28776	3.1058	0.808341	3.05122	2.5873	1.0704	2.75627	3.51938	1.44559	1.26767	1.18702	1.81594	3.1088	1.93722	0.99354	3.16487	5.92217	2.89554	2.13317	1.77417	2.53344	1.14884	1.3649	2.36197	1.23989	3.84089	2.22953	1.50609	1.95919	1.56715	1.69413	6.05716	1.57713	3.93286	3.54852	0.850331	1.88844	2.73532	0.849272	2.84782	4.13895	2.91113	2.13862
ACH-000237	JHOM1	JHOM1_OVARY	3.34674	0.915446	3.86508	3.22695	3.65455	3.32869	3.14916	3.30623	3.06787	2.86891	3.50053	1.81832	1.26543	4.6973	3.06789	6.17358	4.37615	1.91866	3.80089	2.35173	2.88923	2.26792	2.34423	4.34323	3.98263	1.49376	2.45394	4.02475	4.66895	5.6009	4.77328	2.04855	1.69658	3.33758	7.20793	2.81894	4.1334	4.32237	0.963327	1.5046	3.57582	4.04947	0.7703	1.91908	3.09046	6.50544	10.0783
ACH-000239	HUG1N	HUG1N_STOMACH	2.07608	3.72839	2.00621	0.55857	1.44257	2.33869	2.9659	1.62485	4.22299	1.22704	2.05182	6.16345	3.16701	3.5676	1.42834	0.820408	2.13699	1.05299	3.25989	3.93759	4.73968	2.63758	2.94504	1.28999	1.75305	1.9142	2.19405	1.34678	1.99487	5.27243	1.83486	1.96668	0.647588	1.00466	2.23892	1.94271	2.76392	2.89267	3.30811	1.32131	2.06469	2.6053	1.21782	2.75997	1.16583	1.61473	1.05663
ACH-000240	HS600T	HS600T_FIBROBLAST	7.04797	10.6661	6.78395	6.58614	4.47638	7.36618	5.96575	4.40616	8.13705	10.5256	8.48495	7.53431	4.61311	5.53824	6.73005	3.328	8.0673	4.63987	6.57287	5.98185	2.32053	5.7183	10.033	2.77363	9.82723	3.4741	10.9143	5.51218	11.4661	3.41439	9.28333	5.4971	6.16111	4.36751	7.62306	3.69637	8.32181	12.8605	4.65779	6.13802	9.62606	2.24809	4.29488	6.74098	3.66329	9.99846	6.04877
ACH-000241	JK1	JK1_HAEMATOPOIETIC_AND_LYMPHOID_TISSUE	0.312716	0.114129	0.27464	0.116395	0.172806	0.428464	0.0930061	0.266561	0.319532	0.176506	0.415975	0.335785	0.115048	0.305089	0.0631011	0.256803	0.243626	0.140476	0.611699	0.130461	0.579098	0.626769	0.599001	0.264973	0.169161	0.254789	0.101125	0.472093	0.373022	0.875361	0.141744	0.110497	0.157752	0.304793	0.0952043	0.356056	0.213716	0.157468	0.228025	0.225424	0.618285	0.33765	0.312156	0.146026	0.184507	0.274959	0.503412
ACH-000246	SLR23	SLR23_KIDNEY	1.58826	1.69535	1.70955	1.01367	1.30415	1.67238	0.794429	1.50921	1.07939	1.62196	1.17622	0.615135	1.80685	0.842357	0.975942	1.65236	1.53793	3.06575	0.956103	2.0905	1.94892	1.71135	1.41702	3.93386	2.02666	2.31313	1.84538	0.601899	1.25813	1.53168	1.20315	1.63653	1.25518	2.871	2.24888	1.1148	1.74145	0.628758	1.6016	0.649664	1.13983	1.67916	1.67476	1.37464	1.95335	1.83488	1.28266
ACH-000251	NCIH2887	NCIH2887_LUNG	2.49009	0.719379	1.16772	0.87735	2.66504	3.75172	0.500609	2.82165	2.02946	1.67271	1.35485	3.13197	1.69136	2.51237	1.48075	2.8555	4.12308	1.47004	1.78199	2.5929	1.80051	2.89664	3.42771	3.32718	2.2794	2.87764	2.2016	0.868287	1.82623	2.58367	1.29047	1.37265	4.06866	1.58139	2.60399	7.71018	0.911463	1.19844	1.48968	0.674919	7.11775	10.8993	2.11466	2.2486	4.2268	3.29954	2.5338
ACH-000253	COLO201	COLO201_LARGE_INTESTINE	3.02422	3.47392	1.68023	1.11102	1.66381	2.45018	1.10713	2.59083	4.02703	2.37706	2.40154	8.5908	2.78707	4.3185	1.09198	6.51608	1.15813	2.92818	1.92488	0.929319	4.17682	1.48574	3.37821	3.30203	5.27601	2.73009	1.1741	3.31123	5.18528	1.76905	5.36869	2.3209	2.76858	3.52073	2.37332	1.30457	3.2482	2.10238	4.23856	1.41171	1.58106	4.54955	3.42069	2.90403	1.78079	6.19752	3.5224
ACH-000255	LMSU	LMSU_STOMACH	1.85575	1.04053	1.53466	2.15833	1.3964	2.27414	0.947732	1.78463	1.4613	1.90052	0.922579	1.17645	1.31501	1.26511	1.82982	1.62536	1.82615	1.38749	1.66957	1.15218	2.35608	3.48789	1.90894	1.06352	2.61859	0.971462	2.56185	1.26037	2.00353	1.56168	1.3664	2.62448	1.60864	2.32572	3.0496	2.22706	2.78228	3.31449	2.00807	1.12261	3.31691	1.83246	1.71548	2.08625	1.14499	0.830388	3.1453
ACH-000256	COV318	COV318_OVARY	3.24643	2.30854	3.00492	3.32006	1.77453	2.99816	2.59976	1.09299	2.90338	4.23948	4.0962	2.11964	4.5264	3.69786	4.28956	1.6083	1.45554	2.55551	3.44803	4.64952	2.66822	2.92682	4.81373	2.83909	2.69833	4.11609	3.50965	2.34953	2.39411	2.77502	3.38591	2.76108	3.6902	1.60792	2.56965	3.36187	1.64672	4.45484	2.37988	3.72461	2.98873	3.61814	3.28395	2.83321	2.09626	3.44163	3.11817
ACH-000259	KELLY	KELLY_AUTONOMIC_GANGLIA	0.879817	1.38431	0.390076	0.473873	1.24856	0.596634	1.18691	1.48253	0.518197	0.456805	1.215	0.603757	0.803543	1.20547	0.862511	0.771347	0.636988	0.771749	1.03536	1.06724	0.850007	1.04942	0.554391	0.35789	0.790136	0.430834	0.809437	0.592564	0.841342	0.678167	0.601734	0.834392	1.58554	0.88725	0.814802	0.634089	0.56401	1.02547	1.02058	1.13735	1.77664	1.3374	0.682902	1.07559	0.404209	1.12295	1.85991
ACH-000261	RERFLCAI	RERFLCAI_LUNG	1.6046	3.24606	1.42375	3.2914	1.49494	0.283841	2.09079	1.04008	1.61491	1.14451	1.92639	1.26754	1.56813	1.45197	1.64532	1.89022	1.21285	2.71543	1.54861	1.57569	0.933811	1.71677	0.87263	0.962351	1.67532	0.674357	1.25158	0.844526	2.52651	1.36398	1.26023	1.4511	2.06094	1.45715	0.737073	0.360593	2.66006	2.19389	1.07854	2.06479	1.33674	1.14608	1.95469	1.80169	1.75206	1.58667	1.50093
ACH-000262	UOK101	UOK101_KIDNEY	2.18741	1.9564	1.89222	1.40295	2.31695	1.78189	1.48384	1.78332	1.92119	2.1205	2.6919	2.10419	1.86528	1.66672	1.78133	2.91824	1.87782	2.4677	0.868524	2.14819	0.879281	3.16519	1.62252	3.82718	3.09965	1.2248	1.59161	1.88999	1.50301	1.56404	2.20638	2.29563	3.12981	2.84025	1.85623	1.60979	2.46406	1.34184	3.07272	0.989778	1.30553	4.4762	3.49717	2.4559	4.65256	2.68313	1.32099
ACH-000266	SNU213	SNU213_PANCREAS	4.83946	3.49087	3.2255	2.65542	3.98631	4.15074	4.11243	5.32801	1.90239	4.08612	3.51336	2.62842	11.8368	2.9812	7.37326	4.73384	4.42834	8.02868	2.5456	4.07967	3.53543	3.48824	4.48242	5.2507	3.58753	6.75112	3.84168	5.60196	2.58344	2.45693	3.73517	5.90663	10.9613	4.1151	4.2948	3.86995	5.08536	5.16128	7.02613	2.88613	7.68238	8.58873	6.1451	3.7542	3.14536	4.29173	4.05263
ACH-000268	SNU245	SNU245_BILIARY_TRACT	2.6139	3.55077	2.68832	2.06633	1.42324	2.19795	1.49545	1.49892	2.89216	3.26392	4.72522	3.15921	2.06737	3.66637	2.82256	0.765797	2.56602	1.84524	1.56403	4.05411	2.54629	3.81247	1.56231	1.93053	2.73026	2.10608	3.9062	2.02922	3.04209	5.16136	4.59577	2.96596	1.64825	2.20968	1.45902	6.18372	2.42144	3.25439	2.23552	2.2192	1.88106	2.87808	1.01946	2.29713	1.74975	1.48474	2.68494
ACH-000271	SUDHL10	SUDHL10_HAEMATOPOIETIC_AND_LYMPHOID_TISSUE	0.137406	0.13519	0.0803895	0.109964	0.365637	0.062119	0.107838	0.179375	0.125901	0.160644	0.232286	0.217582	0.145111	0.16992	0.231362	0.159302	0.102824	0.112803	0.105856	0.112293	0.154839	0.203257	0.0806434	0.174176	0.121941	0.110385	0.193236	0.11539	0.224406	0.0496463	0.0564826	0.183608	0.124162	0.00731036	0.0780938	0.098162	0.0828014	0.172204	0.173111	0.0614642	0.295095	0.137814	0.196987	0.182133	0.358543	0.107793	0.104334
ACH-000272	SLR24	SLR24_KIDNEY	2.2052	1.50139	2.61665	2.74927	2.11398	3.79969	1.65268	1.60959	1.38369	2.76781	2.5016	2.86514	1.94477	1.32962	2.34629	2.13186	1.21932	2.50602	1.56497	2.12259	1.0599	3.14207	3.76356	3.30473	2.43815	3.50482	2.0771	2.08859	1.42315	1.86792	1.418	1.75402	1.56447	3.19729	1.82581	1.37252	2.90434	1.50817	2.17389	1.12918	1.01442	1.95945	1.38196	3.0324	5.98385	1.02075	1.51444
ACH-000274	HS852T	HS852T_SKIN	3.50137	3.59584	3.24713	2.88544	3.71114	2.74147	3.66257	3.49136	2.32978	1.76278	3.14607	1.10925	2.46998	6.64523	1.86347	5.12503	4.56017	5.33228	2.39347	2.95186	3.10592	0.785352	3.68629	3.6306	4.28713	3.58077	1.98922	3.30352	3.69544	2.08039	1.80712	2.99498	8.47131	1.32995	3.51575	2.48976	2.72552	8.0585	1.61914	4.57491	3.02581	5.24126	4.49702	2.0497	6.1709	6.53907	5.94756
ACH-000275	HS834T	HS834T_FIBROBLAST	6.85334	7.06435	6.31455	10.678	3.90361	7.13389	5.04885	4.72372	6.35747	9.08132	11.0742	8.11459	4.88283	5.55628	4.43136	3.70972	7.8832	3.56257	6.23893	4.58582	2.29493	4.72052	10.1073	3.03945	11.2066	7.05925	16.1252	4.71071	10.365	3.93001	10.2129	5.24428	7.53651	3.28008	6.90699	3.48794	5.92961	11.7374	2.39732	4.55194	7.72134	2.4577	5.36802	8.43903	3.92409	14.9799	10.9982
ACH-000278	COV362	COV362_OVARY	3.15203	3.62853	4.38717	1.74351	3.31901	1.99441	3.54606	1.83836	1.78355	4.23601	2.59362	2.20069	2.10921	2.79912	4.85118	1.10212	3.45445	4.23179	2.4558	2.07978	4.17343	1.86382	2.81164	2.69821	2.76459	2.64788	4.49214	2.37743	2.38216	4.28985	2.41236	3.95418	3.15193	1.95506	2.81224	2.30779	2.40469	3.71214	4.12831	3.61145	1.97771	3.2131	1.78135	3.5158	5.09777	2.85534	5.37104
ACH-000279	EWS502	EWS502_BONE	0.59177	0.928379	0.733051	0.994558	0.220233	0.331234	0.779745	0.392369	0.439212	0.554713	0.430556	0.402624	0.679917	0.530388	0.21015	0.141692	0.447458	1.26449	0.556762	1.03803	0.261515	0.402699	0.447309	0.605578	0.69764	0.836524	1.1505	0.927741	0.417241	0.537049	0.649369	0.591367	0.366942	0.547772	0.769399	0.801397	0.257734	0.352935	0.365767	0.835736	0.375729	0.447404	0.734874	0.63522	0.807956	0.667869	0.684094
ACH-000280	SNU840	SNU840_OVARY	4.34266	3.39117	4.55459	3.18397	3.00938	3.88159	5.70489	5.24704	2.69614	5.02214	5.29819	3.79109	2.62229	3.36705	2.32941	2.5796	5.53564	4.01499	6.17965	3.88724	7.50201	5.87131	5.01108	4.19617	4.95992	2.02781	5.60211	4.77503	5.22486	5.63425	4.19694	2.49776	3.8833	8.88882	3.34319	4.67621	5.50203	5.18791	2.419	3.45258	1.88147	2.38219	3.96915	4.92648	1.62456	4.52204	3.22145
ACH-000283	A1207	A1207_CENTRAL_NERVOUS_SYSTEM	2.80011	1.22833	2.72406	1.98948	2.91109	3.73819	3.03055	1.57572	1.7553	4.56252	1.87585	2.92985	5.24585	3.63787	2.3353	3.56434	2.23827	2.28337	2.37178	1.05148	1.65734	1.05383	6.45338	3.61348	3.3341	4.58528	3.09995	2.67869	3.16091	3.3465	2.33373	4.22301	5.71336	1.41739	3.27336	2.16185	2.0698	0.985146	3.72719	2.03118	1.32645	2.43626	2.94666	1.98504	3.44298	4.49454	2.93673
ACH-000284	HS840T	HS840T_FIBROBLAST	4.64113	5.84891	5.81371	5.43998	7.08345	3.30978	3.38002	3.06638	6.37453	6.36391	4.94128	5.68516	4.63279	7.1616	4.21699	1.00706	5.44217	3.5385	2.8421	6.74495	3.8249	3.67021	3.88052	1.59963	6.22781	5.11139	5.07415	3.07118	4.67938	5.46593	3.642	3.38065	3.90669	2.85669	3.91449	4.41606	4.70261	8.10535	3.38886	1.90295	9.53268	2.58817	2.94535	4.66291	4.58629	5.21734	7.67721
ACH-000285	TOLEDO	TOLEDO_HAEMATOPOIETIC_AND_LYMPHOID_TISSUE	0.134215	0.154087	0.112191	0.225045	0.282112	0.139265	0.067546	0.221203	0.145011	0.104467	0.114185	0.0699528	0.167606	0.163735	0.114363	0.177947	0.13787	0.131907	0.108823	0.0932934	0.0734555	0.136344	0.120396	0.0833463	0.11776	0.143966	0.179932	0.0670386	0.245853	0.16694	0.0951942	0.147694	0.154388	0.0366245	0.109342	0.0929861	0.0905962	0.18613	0.146001	0.0457245	0.089241	0.129896	0.218156	0.134984	0.200203	0.0875691	0.158127
ACH-000286	SNU1033	SNU1033_LARGE_INTESTINE	4.38546	6.70332	4.14887	4.30077	2.32958	1.2894	4.85772	3.43075	4.18544	5.64661	3.49827	3.82467	6.49295	6.47266	4.14447	2.26444	3.40089	3.85026	3.51012	5.57809	3.46225	2.94742	4.04764	3.19744	6.62794	2.72038	6.04401	5.04579	5.70955	3.55228	8.12132	4.93355	4.91798	2.57853	4.52391	1.65941	3.70411	3.10346	5.66752	4.54016	3.71548	5.21505	2.01287	2.38494	3.40018	5.14235	6.809
ACH-000289	SNU466	SNU466_CENTRAL_NERVOUS_SYSTEM	4.38803	4.10304	2.36469	6.78798	2.7106	3.72169	3.72337	4.15839	4.72902	2.17904	5.10182	3.85954	3.30891	3.87129	1.70807	6.82145	2.75594	2.25412	2.62983	5.51342	8.14736	1.60205	7.10259	3.2134	5.6109	3.40421	7.10876	4.00853	4.11232	3.62176	4.26278	3.78065	9.25758	3.17059	5.6891	1.28204	3.73494	6.89772	4.7235	4.07392	7.47828	5.37002	7.31298	5.55819	3.94348	8.03511	10.1994
ACH-000296	OUMS23	OUMS23_LARGE_INTESTINE	3.21428	2.62348	2.52718	2.4468	2.22498	4.27994	3.53989	3.29213	2.07405	1.99101	2.89205	2.02609	1.86435	3.04568	5.08287	1.94677	4.93267	2.7189	2.83152	10.832	5.81454	2.78976	2.74408	2.42181	3.77871	2.50246	4.0444	3.61526	3.02055	2.51745	1.59705	2.12754	2.80638	4.26707	2.94557	3.7559	5.21238	4.16215	2.73497	2.40167	5.00412	5.21435	1.85931	5.46904	3.28521	2.69091	3.22515
ACH-000297	NCIH889	NCIH889_LUNG	1.03505	0.73978	1.18788	0.653945	1.66744	0.497503	0.75667	1.12056	0.828844	0.812103	0.736792	0.905243	0.826686	1.48965	1.45995	1.75332	1.09471	1.66821	0.835131	0.791749	0.880716	0.799843	1.27452	0.833061	0.866004	0.915905	1.6267	0.691091	1.03911	0.679116	0.57719	0.812992	1.07556	0.921411	0.663108	1.36837	0.482828	0.644413	1.73669	1.12258	1.507	1.04305	0.752835	1.19709	1.37087	0.938119	1.08274
ACH-000299	HNT34	HNT34_HAEMATOPOIETIC_AND_LYMPHOID_TISSUE	0.246913	0.054977	0.170175	0.192841	0.101663	0.446462	0.127285	0.213139	0.180203	0.269803	0.210938	0.197881	0.21664	0.38011	0.0775976	0.266066	0.291086	0.137671	0.198036	0.252059	0.745836	0.165289	0.206949	0.3349	0.200637	0.0890481	0.292544	0.428471	0.14275	0.114247	0.310489	0.284929	0.306223	0.186973	0.20596	0.265397	0.110628	0.191471	0.530841	0.31303	0.667231	0.122015	0.248413	0.268056	0.255419	0.178159	0.199307
ACH-000300	SLR25	SLR25_KIDNEY	1.88016	2.14872	2.59656	0.860846	1.28332	1.97584	0.864687	1.16882	0.598911	1.45923	1.56585	0.98605	2.32055	1.08096	0.737542	2.71711	2.12423	3.37427	1.87408	2.82495	1.27984	1.55559	2.44765	2.79679	1.70844	2.78057	3.02541	1.09969	1.60075	3.663	2.08923	2.31515	1.75031	2.05003	1.96487	1.16874	1.46022	3.37822	0.846635	1.69164	0.455854	0.635885	2.36729	1.2552	2.42675	1.86247	0.78312
ACH-000302	SNU1077	SNU1077_ENDOMETRIUM	3.60676	1.92261	2.10068	3.1145	1.63687	2.52242	2.05006	2.21645	1.46243	2.5208	4.25396	3.97243	7.25938	4.00465	6.34551	4.60452	3.75825	3.07083	2.35299	5.19868	2.18937	3.05271	4.18181	4.99278	4.83013	4.36405	2.70656	2.71741	3.66154	4.03582	1.75299	4.74439	3.67319	5.05451	2.93137	2.70097	4.92053	2.36369	3.7084	2.48538	3.01467	6.80029	3.68626	5.07528	6.42049	2.57616	6.46306
ACH-000306	HS688AT	HS688AT_FIBROBLAST	6.54825	6.65314	7.15969	5.26676	4.91636	5.12931	5.91529	2.0453	9.26627	9.41075	6.86625	5.83918	5.25847	11.2666	5.41043	4.10731	6.82731	2.45805	5.68119	6.67604	1.89009	5.68598	7.80902	3.1259	8.60521	6.76628	8.51008	3.94726	14.0083	5.40824	8.52804	6.14004	6.51018	3.5289	7.92611	2.63764	9.83218	12.5043	3.09229	4.77501	4.38261	3.27303	6.11146	6.84983	3.74003	5.85361	12.5358
ACH-000307	PK1	PK1_PANCREAS	1.46484	0.92133	0.988804	0.974911	1.97189	1.39947	1.69945	1.45681	1.2533	1.17888	1.77318	1.4727	1.33301	1.36565	3.77279	1.85693	0.797445	1.99824	2.14694	0.833044	2.53734	0.608479	1.11869	1.53491	1.15457	0.950589	1.2919	2.32134	1.47195	1.65758	1.75202	2.36147	0.916452	1.56535	0.905758	0.986054	1.56743	1.4172	1.11255	1.36235	1.33743	0.995592	1.33863	1.1602	0.898254	1.3108	1.15049
ACH-000310	IMR32	IMR32_AUTONOMIC_GANGLIA	0.841677	1.03224	0.571407	1.57293	1.47133	0.470468	0.849666	1.05058	0.587789	0.620905	0.176129	0.587377	1.50165	2.05093	0.863594	0.571214	0.641998	1.70027	0.487785	0.777809	1.48379	0.767721	0.519285	0.686925	0.713003	0.832977	0.535734	0.63799	1.0729	1.03274	0.888942	0.92163	0.872022	1.31456	0.620206	0.579891	0.769944	0.251476	0.843463	0.789194	0.952544	0.998997	1.11894	0.541752	0.590487	0.478339	1.04891
ACH-000312	SKNBE2	SKNBE2_AUTONOMIC_GANGLIA	0.757425	1.40798	0.512558	0.541182	1.17863	0.229238	0.469171	1.09772	0.487792	0.427128	0.936771	0.402274	0.639329	1.63255	0.799037	0.977235	1.37244	1.08684	0.658916	1.36185	0.914346	1.37062	0.702681	0.240249	0.794261	0.177365	0.756549	0.312115	0.714966	0.581532	0.507091	0.464138	1.12737	0.815615	0.649518	0.448524	0.482261	2.05739	0.554995	0.647911	0.814921	0.857808	0.440379	0.556115	0.626784	0.471812	1.59446
ACH-000313	KMRC3	KMRC3_KIDNEY	3.68705	3.58372	6.20696	1.64512	1.71457	4.48722	7.15536	1.68938	2.38241	3.05155	4.61924	1.3215	5.41708	0.999937	3.44115	5.04542	3.8375	3.70695	4.05543	5.68104	2.07713	2.07645	2.922	7.5432	4.44343	2.88177	2.37562	4.99884	2.6663	3.06332	2.47687	6.81997	2.18621	4.80999	5.02001	0.193875	3.5164	7.02053	2.55457	1.91626	2.16549	2.61887	3.88957	2.42774	5.96472	3.39669	1.16784
ACH-000314	HCC2108	HCC2108_LUNG	1.56491	1.69244	1.03041	0.733781	2.90214	1.74715	0.836313	1.48248	0.957532	0.923582	1.52039	1.76465	0.964325	0.952373	1.54258	1.72002	0.675179	1.96292	0.889377	1.19313	1.91268	1.2755	1.09702	0.895538	1.36947	0.713307	0.786219	0.529198	0.81544	1.36512	0.843154	1.49914	1.84035	1.15934	0.97644	1.30701	1.89997	1.43803	2.79372	1.58939	1.6608	1.61043	2.32453	2.13159	2.42082	0.308953	1.10275
ACH-000316	SNU886	SNU886_LIVER	2.54627	1.68616	2.4254	1.41308	2.29087	2.49678	5.39739	1.13549	3.44416	2.43083	0.987583	3.56116	2.53345	2.43817	3.61384	3.2668	1.21975	1.97798	1.37627	1.6087	1.52408	1.80624	2.28222	2.93339	3.2387	3.83625	0.77961	3.28536	1.32682	2.79639	2.33964	2.04502	2.18866	2.78574	1.42652	1.43757	2.58008	1.75479	2.7505	2.17016	1.8027	3.83474	1.32121	1.39388	5.5271	1.23431	1.50083
ACH-000317	TUHR14TKB	TUHR14TKB_KIDNEY	2.16067	2.28269	2.16578	1.5605	1.96912	2.58306	1.50723	1.32956	1.88989	2.78215	2.17698	2.31245	2.47487	0.963646	1.28368	2.58685	1.60401	1.7747	1.37228	4.88862	2.71595	1.79459	2.59275	2.84971	2.37838	2.04705	2.23439	2.72268	0.999455	2.87476	2.22137	1.9751	2.32739	2.60873	1.94203	2.19723	2.79059	1.84887	2.66214	0.849274	2.11003	2.39854	1.39183	4.13318	4.46596	1.63597	1.27333
ACH-000321	MOLM6	MOLM6_HAEMATOPOIETIC_AND_LYMPHOID_TISSUE	0.129744	0.0749433	0.128259	0.102974	0.0378341	0.0702432	0.14673	0.0998106	0.121412	0.069305	0.097273	0.0646017	0.124883	0.157579	0.0981324	0.16317	0.175489	0.0863162	0.0677182	0.221374	0.131223	0.200308	0.0496202	0.150679	0.163797	0.0812734	0.0856976	0.146632	0.152724	0.124038	0.140534	0.120697	0.211681	0.0679549	0.110215	0.0964118	0.113634	0.192722	0.181605	0.142253	0.167324	0.120712	0.09697	0.14008	0.0899911	0.0296884	0.140424
ACH-000324	JHOC5	JHOC5_OVARY	1.35861	2.14436	1.47447	1.3783	1.18734	1.08698	1.03057	1.56977	1.48976	1.03115	1.56293	1.59931	1.73308	0.514454	0.355647	0.969312	0.699737	1.49359	0.902628	1.54106	1.33149	1.66612	2.11948	1.92645	1.23593	1.53725	1.35318	0.881916	2.24626	0.548188	0.846743	3.21187	0.891573	1.28754	1.31512	0.883727	2.40048	1.80604	1.42458	0.817819	0.892918	0.532604	2.52712	1.23414	1.59798	0.904501	1.4327
ACH-000325	SNU620	SNU620_STOMACH	2.19166	2.85168	2.95495	1.82436	1.33681	2.12981	2.04194	2.02989	2.69115	2.26541	2.28964	1.80864	3.07189	2.57313	1.4076	1.02957	2.90657	2.12652	2.1129	4.43958	6.44	1.95371	1.07564	3.12421	2.43126	1.78223	4.42975	3.00114	0.780485	2.79034	1.59105	2.01685	2.00574	0.942943	1.93168	3.5929	2.41574	2.74827	2.87174	1.67948	1.86397	3.01712	1.03868	3.44674	2.31363	2.72305	2.50077
ACH-000328	LN215	LN215_CENTRAL_NERVOUS_SYSTEM	3.71983	2.51348	3.09196	4.17549	4.09503	4.84598	4.91968	4.51694	2.12571	4.93508	2.32541	4.30133	4.69833	1.36114	3.19485	3.40933	2.72854	5.57708	2.94059	2.3184	2.02589	3.94	5.42952	2.33576	3.47787	4.10712	2.99603	1.73805	5.53954	1.80152	1.54888	4.81015	6.19267	2.38406	3.51611	2.43702	4.04017	3.79169	5.10397	6.59029	4.63855	4.81866	2.73595	4.5884	3.73071	2.25999	3.25907
ACH-000331	ISTMES2	ISTMES2_PLEURA	2.012	2.42235	1.6885	1.12519	4.10308	1.92572	2.55942	1.63008	1.94026	1.77906	1.72191	3.56644	1.6521	1.61995	1.31138	1.49445	2.62098	1.75367	2.29289	2.82323	1.64458	1.95792	2.76092	1.22192	1.48895	1.96583	2.51339	1.64268	1.23834	1.49376	0.945795	2.80921	1.33377	1.4162	2.01765	2.99487	1.69235	3.03973	1.48365	2.35747	4.73369	1.48925	2.16839	2.18761	1.46286	2.32518	1.17416
ACH-000333	JHOM2B	JHOM2B_OVARY	2.98212	2.93449	3.16966	1.83118	1.40086	4.19573	3.45803	1.70497	2.53392	3.03601	1.66489	2.53815	4.37873	1.81049	1.70528	2.69306	3.08068	3.69974	2.30746	3.05411	4.6357	2.77247	2.67935	3.83081	1.94134	4.21505	3.16731	2.96277	2.19054	3.51971	2.81662	3.16434	4.64529	4.23054	2.69498	4.18789	3.93152	2.60744	2.80696	1.40227	2.49904	2.17496	1.75333	2.11166	1.5712	2.76933	1.60055
ACH-000339	HCC461	HCC461_LUNG	3.12404	2.4788	1.95646	1.75605	4.89301	4.24317	2.51632	2.71019	0.806174	5.33932	1.61913	2.4191	2.01523	2.11183	4.95618	3.80119	2.50372	3.93705	2.92386	1.17839	2.20805	1.47787	3.52416	1.92846	4.45405	3.40846	3.36755	1.82051	5.93794	3.70143	2.47133	2.05957	2.9177	0.957584	4.40262	3.54326	3.44337	2.88064	2.77309	5.32761	2.94669	4.02698	3.10802	2.18733	2.47819	2.73817	3.35973
ACH-000340	HS870T	HS870T_FIBROBLAST	4.46461	6.17423	3.68776	4.36815	4.31061	2.95535	3.32802	2.56716	4.14071	8.05102	4.56352	2.87015	4.46325	5.1465	5.79489	3.17833	7.23525	4.53336	6.0322	4.40722	3.07017	5.53299	4.19896	2.801	6.48346	4.42057	4.57654	3.59759	8.51605	2.87148	5.35116	3.22886	4.21751	2.78795	4.1421	2.52764	5.63891	10.3323	3.27741	6.24332	7.50007	2.7764	2.93009	4.166	2.51744	4.8475	7.27023
ACH-000342	CL14	CL14_LARGE_INTESTINE	5.47918	3.13053	4.27904	2.10872	3.20936	4.16981	6.2053	3.88084	3.10318	4.96938	3.87851	5.30035	16.6492	6.3392	5.29337	4.86723	2.06654	4.51662	5.15902	6.60993	3.59944	3.26301	9.88648	4.16407	7.80729	6.54411	5.18124	4.94598	2.82518	4.70176	4.84744	7.0783	6.52888	3.01512	5.41478	3.95737	4.78374	4.47686	5.5128	4.63667	3.94472	8.85209	4.22622	6.82429	5.1216	8.09239	6.38975
ACH-000343	NCIH522	NCIH522_LUNG	2.2654	1.75682	1.51255	5.9228	2.08462	1.4537	0.894083	1.48521	1.29977	1.32496	5.38793	2.1688	2.15718	1.63165	2.18332	2.00435	3.377	4.66035	1.83308	2.95244	6.10034	2.0712	1.55337	1.73623	1.5182	1.49427	2.1789	3.21487	0.898263	3.09484	2.98908	2.90819	2.28181	1.82942	1.17315	2.35761	1.59222	2.20603	2.48079	1.72042	1.51414	1.0458	2.01474	2.44811	0.902279	2.69036	1.66317
ACH-000344	SNU668	SNU668_STOMACH	3.1566	0.957507	3.78137	2.58732	2.44499	3.09308	3.19562	4.68184	3.4095	3.01338	1.50271	2.0986	0.90242	2.24964	1.71719	1.42075	3.69295	2.64524	5.78062	2.98759	2.71229	6.37143	2.7911	3.49465	1.96729	2.93507	1.98328	1.96368	4.5782	3.49802	4.50195	1.57096	4.91175	2.06027	2.00813	2.61188	3.61665	5.77866	2.47369	3.22317	2.69031	3.70856	1.85184	0.81676	2.19131	1.27742	3.51558
ACH-000345	KPNRTBM1	KPNRTBM1_AUTONOMIC_GANGLIA	0.989015	1.06008	0.747604	0.996015	2.23553	0.348337	0.287165	1.38801	0.590806	0.458067	1.27293	0.71269	0.483585	2.65352	0.826068	1.3253	3.30933	0.866315	1.07275	1.99844	1.36786	1.3156	1.04312	0.330156	1.00737	0.545542	1.16303	0.418369	1.2096	1.28	0.261763	1.29907	1.0574	1.42163	1.03003	0.825065	0.715496	0.863374	0.568321	0.447825	1.24299	0.989901	0.516782	0.451971	0.595582	0.651656	2.17677
ACH-000368	SNU1105	SNU1105_CENTRAL_NERVOUS_SYSTEM	5.48035	4.0107	9.6004	4.99378	1.74196	3.60374	2.55417	6.27579	5.39535	5.6838	3.9713	6.60901	8.4787	14.6793	2.51739	6.43485	3.38171	4.51647	2.54679	5.89365	2.8031	6.65344	8.35072	5.29993	6.5701	8.76085	5.28235	2.06432	8.43234	2.82514	4.16074	4.70841	6.31721	2.58634	5.44033	4.09032	4.3816	4.85802	12.7747	3.28648	9.89316	5.57498	3.13453	6.31691	3.10126	5.29179	10.199
ACH-000370	SNU626	SNU626_CENTRAL_NERVOUS_SYSTEM	3.30744	2.37788	3.53659	6.20358	3.61681	2.75476	2.0944	1.619	2.62952	2.01879	4.51618	3.67852	4.97856	3.17301	2.88988	3.86716	2.01895	5.94701	2.20558	3.32227	1.95267	2.30479	3.84092	1.37025	1.9979	1.98758	1.59327	2.29604	2.58973	4.2199	2.50556	2.94164	8.32468	1.28529	2.05792	0.677734	2.67363	4.83997	4.83621	4.53881	4.94744	2.55279	2.04039	3.12196	2.82174	2.98244	6.40444
ACH-000372	P12ICHIKAWA	P12ICHIKAWA_HAEMATOPOIETIC_AND_LYMPHOID_TISSUE	0.0746698	0.160514	0.063155	0.0454134	0.0441362	0.0684431	0.0270845	0.0259996	0.020187	0.0634361	0.166791	0.094669	0.242406	0.0281533	0.0780764	0.0509046	0.0645829	0.0405522	0.0391726	0.0379844	0.0640052	0.0533023	0.0788783	0.113394	0.111846	0.103214	0.098795	0.0735285	0.0268751	0.266486	0.0843652	0.037453	0.0624905	0.147239	0.0294223	0.140367	0.0409165	0.0191861	0.0731818	0.0389323	0.0243542	0.025242	0.052246	0.117105	0.0899682	0.108728	0.0460807
ACH-000377	SNU478	SNU478_BILIARY_TRACT	1.55884	0.485307	2.20272	0.851935	1.405	0.910841	4.6132	1.19966	1.10847	1.08136	1.10065	0.680065	2.23125	1.53783	2.0895	1.66305	2.83117	0.603327	2.01685	1.91027	2.80922	2.74312	1.5444	1.47405	1.30142	0.938914	0.918003	1.09807	1.24322	1.55793	1.66424	1.26623	1.34809	1.03617	1.57113	1.21647	1.13424	1.97061	1.91611	1.59338	2.0505	2.41046	1.01013	1.02842	2.81075	1.00411	0.940227
ACH-000382	CORL24	CORL24_LUNG	0.784413	0.762175	0.809587	0.641687	0.779871	0.760024	1.24504	0.210525	0.902447	0.689423	0.240463	0.529137	1.66106	0.403558	0.672243	1.02502	0.445709	0.740846	0.562209	0.529591	0.67498	0.602486	0.819995	0.732178	0.485041	0.854564	0.354061	0.840195	0.393119	0.77833	1.67267	1.4341	1.15922	0.334481	0.550283	0.491173	0.651442	0.301141	1.33049	1.3148	0.999024	0.679001	0.535641	0.248212	0.50006	0.337911	0.222838
ACH-000385	SKRC20	SKRC20_KIDNEY	2.85882	3.62002	2.2737	1.97796	1.79406	3.06667	2.13399	1.69276	1.78178	2.31543	3.66038	3.27688	2.17581	2.1153	0.970082	3.62858	2.28089	3.92863	1.91399	2.90507	2.35897	2.07021	4.86751	3.97786	1.91268	3.304	2.62226	1.71272	2.50835	3.9793	2.22048	4.49282	4.46452	4.27406	2.58913	1.8272	2.64358	4.25251	1.97875	3.00505	0.99618	3.07593	1.30677	2.80173	11.6442	3.30383	1.76819
ACH-000387	TF1	TF1_HAEMATOPOIETIC_AND_LYMPHOID_TISSUE	0.296645	0.183507	0.223564	0.117595	0.27172	0.351666	0.183987	0.170739	0.289812	0.246324	0.234256	0.470123	0.270625	0.359728	0.0876656	0.233009	0.654608	0.238095	0.12313	0.114055	0.52572	0.177983	0.539414	0.172875	0.204206	0.177626	0.141748	0.39955	0.437618	0.698368	0.885207	0.129901	0.34654	0.163107	0.138691	0.180613	0.20934	0.190902	0.651664	0.51193	0.486018	0.269793	0.162747	0.120411	0.337973	0.0666075	0.29886
ACH-000388	NUDHL1	NUDHL1_HAEMATOPOIETIC_AND_LYMPHOID_TISSUE	0.0910722	0.0723402	0.0300448	0.0707911	0.206994	0.0519266	0.0701851	0.028565	0.046968	0.0536036	0.235123	0.166031	0.0183794	0.0944052	0.0866774	0.395304	0.142105	0.0420775	0.069279	0.0467968	0.343236	0.0756592	0.0365151	0.109649	0.0504178	0.042376	0.0562284	0.286105	0.0585202	0.0562982	0.0660397	0.0548386	0.0779238	0.0344879	0.0410251	0.108886	0.097513	0.146328	0.0674766	0.0683675	0.270284	0.093648	0.101258	0.116927	0.106808	0.112788	0.0558763
ACH-000390	LUDLU1	LUDLU1_LUNG	2.08174	1.96942	3.02189	2.00621	2.03173	1.50811	2.06522	2.13729	1.8079	0.995594	3.01405	1.21984	1.56834	1.74289	2.27512	1.64543	1.59949	2.08577	2.15477	1.1201	3.69923	1.04458	1.55844	2.18445	1.96377	1.08595	1.14321	2.49385	1.90296	3.09351	2.93726	1.12205	1.81448	3.18313	2.36181	1.61669	1.61562	2.25591	1.23714	2.40086	1.12056	1.42772	2.40404	1.42008	1.20852	1.1925	1.72712
ACH-000393	HLF	HLF_LIVER	2.09343	1.41715	1.05948	2.05285	1.81149	1.87481	2.76996	1.80769	2.11948	2.24895	2.12668	3.3742	2.17212	1.70656	3.09627	2.32423	1.2788	5.98718	2.15419	2.69769	1.12733	2.66277	2.24835	1.57085	2.04458	1.55769	1.60889	2.30371	2.00553	0.509847	1.52434	2.95268	1.63221	2.2526	1.67627	1.00843	2.28816	3.15764	2.05137	3.0445	1.74557	2.81245	1.12077	3.11799	1.76232	2.7398	1.1199
ACH-000397	TEN	TEN_ENDOMETRIUM	3.08785	2.41256	1.90159	1.42971	1.63366	2.4158	4.19473	1.68394	3.01104	3.12885	4.09649	3.82304	2.42774	2.33441	2.5933	1.16156	2.45003	8.15867	2.27633	2.33766	3.10117	2.42496	2.35747	3.71514	2.95045	5.2308	2.15399	3.93114	2.61012	2.13753	3.4461	3.40139	4.90295	3.00909	2.39462	2.67397	3.69764	3.16111	2.07092	4.72925	1.68239	2.7525	2.35274	2.02522	1.62474	4.28371	2.67322
ACH-000398	RI1	RI1_HAEMATOPOIETIC_AND_LYMPHOID_TISSUE	0.277114	0.432266	0.203129	0.110599	0.450153	0.243899	0.92424	0.100716	0.247947	0.461969	0.349148	0.291614	0.387044	0.238748	0.412277	0.0500964	0.175221	0.147996	0.308966	0.268328	0.249078	0.312242	0.241312	0.124069	0.450917	0.302002	0.465773	0.539144	0.395515	0.464175	0.506859	0.34566	0.119081	0.318352	0.204962	0.200299	0.213653	0.254887	0.125365	0.223739	0.123238	0.195853	0.410713	0.209955	0.183201	1.11591	0.158353
ACH-000399	NCIH2196	NCIH2196_LUNG	3.01828	4.52859	3.45851	4.01921	7.6388	4.07468	1.33072	2.67819	6.77534	2.61444	3.27546	7.98609	4.35985	4.19858	2.75015	1.87659	2.29614	3.32199	1.9928	1.72025	1.71779	2.45496	2.68565	1.24039	4.29588	3.32135	2.23805	1.69682	2.93582	6.67888	3.68966	1.31971	4.70802	2.3433	3.41814	3.51657	1.57448	2.03453	2.55748	4.75113	1.88341	1.16856	1.14176	1.16993	4.52661	4.41439	1.08481
ACH-000402	BL70	BL70_HAEMATOPOIETIC_AND_LYMPHOID_TISSUE	0.131813	0.120506	0.107681	0.0463169	0.199852	0.144827	0.183534	0.156243	0.227092	0.249705	0.0644033	0.201634	0.0736646	0.117447	0.180473	0.129128	0.149634	0.0394244	0.083095	0.0935249	0.209652	0.110628	0.1293	0.107757	0.221872	0.124268	0.208598	0.0948449	0.391049	0.074309	0.121836	0.115117	0.12486	0.0178172	0.0746327	0.0647928	0.163325	0.303853	0.137996	0.127514	0.16322	0.150966	0.0966726	0.0488367	0.133135	0.0420147	0.106404
ACH-000404	K029AX	K029AX_SKIN	2.42879	1.91594	2.28984	1.74563	1.9925	2.08795	2.36408	2.87907	0.885438	1.31465	2.97797	1.87224	1.12324	3.99563	1.51314	1.20184	2.7319	1.71567	2.26543	2.39012	1.5256	1.91921	2.48324	1.45735	2.41592	2.15661	2.70275	1.93428	3.10734	2.04141	1.77917	3.01162	2.04132	3.09007	1.54925	3.86014	1.86383	1.9825	2.00862	3.03069	1.45894	2.16067	2.44767	2.67188	4.52279	3.94091	3.84973
ACH-000405	MEC1	MEC1_HAEMATOPOIETIC_AND_LYMPHOID_TISSUE	0.129482	0.065866	0.0769394	0.150163	0.217518	0.120111	0.217928	0.133319	0.129386	0.0866245	0.204616	0.10523	0.118813	0.118455	0.32739	0.141503	0.0965816	0.125911	0.150391	0.124787	0.308612	0.0841223	0.069197	0.113895	0.0954027	0.0774284	0.105982	0.237306	0.0476965	0.164687	0.1009	0.0892343	0.0730674	0.0740847	0.095192	0.230541	0.108908	0.101015	0.0890033	0.0517742	0.325197	0.137193	0.19337	0.0882459	0.215357	0.132939	0.0712121
ACH-000406	U937	U937_HAEMATOPOIETIC_AND_LYMPHOID_TISSUE	0.0935589	0.14517	0.203626	0.0436932	0.0145234	0.129872	0.0753662	0.0109664	0.0695137	0.186155	0.0348113	0.0575129	0.318672	0.0492064	0.0772127	0.0632732	0.0423511	0.0617552	0.0469847	0.0596785	0.0953904	0.094779	0.0341981	0.465473	0.104431	0.111279	0.0543022	0.301008	0.0172951	0.237018	0.135589	0.0560079	0.153424	0.109411	0.0686503	0.0704471	0.0404747	0.130114	0.103118	0.0743971	0.0479906	0.063828	0.0844327	0.0177017	0.0581634	0.0507347	0.0132149
ACH-000407	SNU685	SNU685_ENDOMETRIUM	2.11243	1.49327	2.2839	2.46051	1.46967	1.58331	2.97528	2.23798	1.78829	1.97381	1.8991	2.54928	1.58184	2.84824	2.60739	2.44516	1.27383	2.59544	1.51113	1.79547	1.04523	1.49907	1.79655	1.57043	2.35264	2.15326	3.26581	1.35924	2.50315	1.68296	2.36575	2.02535	2.04522	0.725023	1.99909	2.70275	1.39288	1.41187	3.74821	2.10935	2.58796	2.61864	2.44541	1.6964	1.99493	2.38912	1.79289
ACH-000409	OVSAHO	OVSAHO_OVARY	2.53601	2.66313	1.82268	3.1883	2.67626	1.49762	2.34895	0.938691	1.2046	1.66173	1.62015	2.39892	3.94752	0.89125	3.37263	1.55046	2.05626	2.5071	1.00115	2.13946	4.53138	1.42483	2.81462	2.01896	1.79266	6.71648	2.78041	1.8941	2.12082	4.2297	1.61079	1.88239	2.11586	1.53158	1.66653	4.48339	2.46731	0.909222	2.44344	4.85672	2.56202	3.74921	2.68109	2.0645	8.82311	1.99865	2.26691
ACH-000412	SNU1197	SNU1197_LARGE_INTESTINE	5.45701	5.77135	4.74203	4.21954	4.21383	3.81239	2.794	5.14232	4.78573	5.6758	8.65224	5.15953	11.0421	4.93162	6.45998	2.1645	2.70784	9.08003	2.46406	9.12395	6.95902	4.86271	4.60937	5.94052	7.71843	4.34207	3.9559	3.66203	7.25351	4.12868	4.59494	10.6219	11.3639	4.17736	6.17376	4.07161	3.1878	3.75931	6.25396	3.65492	4.52838	5.40044	5.77396	6.82945	3.42883	6.41668	5.16515
ACH-000413	HS739T	HS739T_FIBROBLAST	5.68674	6.63902	5.58019	5.61608	6.40762	4.56682	3.61686	3.82774	5.93394	6.78289	5.86306	4.79956	4.81796	8.80516	4.75216	3.76501	8.37042	2.18895	4.74087	7.22511	2.75002	4.68968	5.6955	2.37884	8.68721	5.327	12.8166	3.23914	10.9567	2.81478	6.59233	4.61152	4.89859	3.68179	7.28434	3.45005	6.90967	11.1332	3.33948	4.00256	7.67252	3.14106	4.01459	5.38601	2.16922	7.25593	11.1395
ACH-000415	BICR6	BICR6_UPPER_AERODIGESTIVE_TRACT	2.73202	1.42601	1.88473	2.49407	0.940117	1.87073	2.46356	3.17022	1.94129	2.50168	2.99618	2.04091	3.49438	4.51557	2.84654	1.36556	1.64015	2.45534	3.41376	3.24592	2.18197	2.2805	2.92474	2.03625	4.71757	1.41557	4.62566	1.79421	3.32354	3.28397	4.26405	4.80609	2.47998	2.75172	2.94295	1.65399	1.4752	1.5274	2.56202	1.56032	1.86484	2.34198	2.52189	3.66576	2.08136	4.14371	7.64533
ACH-000418	SW1353	SW1353_BONE	3.84423	2.44975	4.20832	4.91432	3.02082	5.15081	3.40094	5.34664	4.22012	4.90382	2.38034	3.14188	6.34896	6.48947	1.82609	3.38817	2.87914	4.24949	4.06864	1.76303	2.80657	3.86343	4.34987	3.68699	3.67723	5.3201	3.2684	2.49352	5.26723	2.7307	1.67272	4.16133	8.11516	5.91606	5.45145	4.1485	3.77627	4.38005	2.89819	2.8898	4.20155	3.75821	5.93822	3.57862	2.69232	7.37591	2.5146
ACH-000419	KMS28BM	KMS28BM_HAEMATOPOIETIC_AND_LYMPHOID_TISSUE	0.425666	0.500784	0.443648	1.17274	0.262922	0.313678	0.51609	0.644656	0.616366	0.343437	0.731635	0.558344	0.119622	0.888328	0.208474	0.216407	0.516953	0.358091	0.177692	0.409794	0.271278	0.771174	0.414607	0.227472	0.286919	0.364839	0.589935	0.336508	0.753534	0.474299	0.484067	0.246137	0.824875	0.215958	0.266094	0.584309	0.297051	0.331584	0.283393	0.348861	0.153894	0.214487	0.631696	0.386192	0.48255	0.607962	0.581398
ACH-000422	SNU475	SNU475_LIVER	4.14402	2.35462	3.58717	0.84409	1.51567	6.20854	4.69133	3.22131	3.47087	4.628	3.60411	6.32991	3.87199	8.60164	1.61626	3.28382	1.90589	4.05334	3.98201	2.17595	3.46158	3.37365	5.09051	2.24643	9.37759	5.72644	5.55492	2.66676	4.62007	4.87633	4.26737	3.26105	2.63777	1.57898	3.81127	3.97788	3.65185	3.53605	3.17355	3.48512	2.78392	6.35073	2.61106	5.9875	6.27265	6.20539	2.66384
ACH-000435	EFE184	EFE184_ENDOMETRIUM	2.27077	2.44057	2.0266	2.96296	1.30097	1.70967	2.41066	2.03421	1.36106	1.71254	2.20194	1.82347	2.16727	2.40585	0.55107	1.41989	1.91342	2.14078	1.82052	3.77867	3.35836	4.40397	2.87538	2.757	2.00893	1.76497	3.02149	2.38712	2.16516	2.07858	1.35954	2.04361	2.19171	1.96218	1.76113	5.05169	1.46624	2.10517	1.69969	1.80356	1.71972	3.20002	2.20245	3.24126	3.95517	2.68766	1.75224
ACH-000436	OCIMY7	OCIMY7_HAEMATOPOIETIC_AND_LYMPHOID_TISSUE	0.232709	0.147915	0.106101	0.216559	0.287898	0.158331	0.082018	0.293947	0.168594	0.334636	0.230131	0.067666	0.221878	0.283772	0.312747	0.508341	0.152858	0.0950472	0.115214	0.121135	0.340065	0.197667	0.154714	0.247733	0.223808	0.260883	0.450636	0.247758	0.256346	0.219642	0.212033	0.099778	0.272579	0.127867	0.192022	0.276868	0.203704	0.202609	0.203267	0.0940215	0.150244	0.249541	0.272964	0.253246	0.05237	0.270825	0.408481
ACH-000444	LU99	LU99_LUNG	1.48769	1.35193	0.845848	1.6431	2.64911	0.950594	0.904798	1.34883	0.974869	1.16151	2.32095	1.39725	2.84854	1.56219	1.73962	1.09083	2.28535	1.48939	1.03713	3.85316	0.505701	2.67329	1.38045	1.22473	1.33533	1.59481	1.29877	0.828002	1.49462	1.71978	1.3347	2.03167	0.958234	1.47952	0.563893	1.76046	1.21833	0.785311	1.43446	0.925402	1.28418	2.28494	1.27763	1.31935	1.24323	0.794729	1.4497
ACH-000445	KNS60	KNS60_CENTRAL_NERVOUS_SYSTEM	3.15243	1.87135	3.45591	4.24591	2.89938	3.94668	3.30782	2.4772	1.96969	4.05461	2.10277	3.1483	5.01058	2.80121	2.87017	1.69138	3.71379	4.00596	2.15377	1.87704	2.15609	2.49176	4.75063	3.15538	2.13421	3.62419	2.09626	3.81882	1.84411	2.42177	2.53805	1.79021	3.82396	3.5697	3.76161	2.34654	4.00418	2.07424	4.966	3.88774	4.19639	3.28735	2.19661	1.86347	2.34045	4.76821	1.93597
ACH-000446	KPNSI9S	KPNSI9S_AUTONOMIC_GANGLIA	1.74781	1.61564	1.0323	2.14283	1.09832	0.869686	2.28128	0.845624	1.22022	2.4156	1.73588	1.59173	1.37455	2.0641	1.04522	1.77107	1.40669	0.828579	1.32891	1.59667	0.568647	1.23667	2.12458	1.82649	2.81301	1.72205	3.91864	1.36221	2.2378	1.181	1.51175	2.38975	1.77902	1.20079	2.80642	1.34143	1.14371	2.24633	1.17491	1.54624	3.1	1.57264	1.25465	1.74623	1.50367	1.96642	2.98553
ACH-000453	MOLP2	MOLP2_HAEMATOPOIETIC_AND_LYMPHOID_TISSUE	0.346001	0.46408	0.334295	0.20942	0.614767	0.209073	0.149338	0.338445	0.201118	0.370315	0.393399	0.266306	0.321	0.197921	0.154435	0.922551	0.387948	0.516721	0.270069	0.233621	0.586497	0.379788	0.273235	0.563292	0.169562	0.260962	0.203352	0.369806	0.112901	0.27513	0.359014	0.170768	0.453536	0.22443	0.133761	0.388727	0.46396	0.528607	0.245605	0.226918	0.314788	0.379891	0.637163	0.659679	0.326246	0.120763	0.252512
ACH-000454	HCC95	HCC95_LUNG	1.38284	1.01165	0.739494	0.905206	1.87382	1.36465	1.51233	1.56901	0.758625	0.894448	1.15693	0.957406	1.3254	1.44977	1.05063	3.49948	1.09305	0.670748	1.50202	2.06831	1.29115	1.11592	1.74929	2.31818	0.99152	1.4436	0.894329	1.1393	1.63058	0.503553	1.25995	1.88701	0.73171	1.19591	1.25857	1.03754	1.01751	1.10648	1.10466	1.38155	0.971853	2.59282	2.58718	1.49294	1.96219	0.842379	1.26417
ACH-000455	LN428	LN428_CENTRAL_NERVOUS_SYSTEM	2.55554	2.35053	2.57281	2.41127	2.9167	1.97812	3.31228	2.60032	1.71512	2.86966	1.3895	1.59536	1.82403	1.6034	2.6871	3.09379	1.40146	2.72989	1.6061	1.30448	1.34071	2.46077	2.06614	2.32906	2.676	2.57566	2.26143	1.75019	2.01361	2.6908	2.08854	1.84023	3.28365	2.48071	2.5149	2.48864	0.999173	0.947611	4.83877	2.66212	2.54771	3.78363	1.87403	1.77012	1.91674	1.38363	3.42716
ACH-000458	CJM	CJM_SKIN	1.28801	2.26574	1.64301	1.87964	0.63787	1.08348	1.55475	2.03272	0.794686	1.17913	1.32011	0.608031	1.48686	0.833789	1.39586	1.61402	1.08812	2.54868	1.07509	1.41556	2.51216	1.19109	0.421968	1.36668	1.06226	0.737488	1.50672	0.951566	1.76905	0.277388	1.99914	1.93374	0.549262	1.1644	1.21231	2.19405	0.706527	0.612656	0.891056	1.1933	1.26954	1.42439	3.76062	2.00052	0.80154	1.52997	0.967121
ACH-000459	TUHR10TKB	TUHR10TKB_KIDNEY	1.96383	1.33698	2.96723	1.76848	1.11365	3.1446	3.51318	0.459991	1.43117	0.927603	1.73743	1.05363	1.52191	1.33619	1.36299	5.90371	2.08928	1.74979	1.36945	3.90003	1.75846	1.26502	2.62522	2.79633	1.47684	0.924213	0.725734	2.28091	0.729365	1.37401	1.33067	1.61816	1.47122	4.15921	1.37315	0.857426	1.22066	2.03699	1.45029	1.40803	2.91516	5.67647	3.13593	2.31121	5.10656	0.670643	0.619743
ACH-000460	SNU8	SNU8_OVARY	3.44886	4.5707	4.84222	0.978165	2.51377	2.1749	5.02206	3.10945	2.34328	2.28966	4.17092	1.77498	7.50281	3.84982	7.5713	1.68118	2.24092	7.75656	2.93792	6.39745	2.21499	3.65361	2.25071	3.761	2.43072	2.51313	0.931696	3.27022	2.26124	3.30086	2.47443	8.68268	4.02229	5.01906	3.10298	1.83033	2.30505	4.73385	3.54528	2.93663	2.65926	3.13956	4.61579	2.8436	2.61697	2.17106	4.22166
ACH-000461	SNU1196	SNU1196_BILIARY_TRACT	3.38916	2.45253	4.26342	2.74058	4.04164	2.25807	2.67582	2.98718	4.82121	4.78093	3.55336	3.65613	3.66845	7.29686	5.16483	2.20524	4.98901	2.64503	2.84616	2.72575	3.49271	2.50605	3.04666	4.37495	2.54869	2.34207	2.61013	5.99271	4.37092	3.2323	6.26981	2.95046	3.79528	2.93597	2.39401	2.38697	2.86565	3.23478	3.95288	1.66841	4.22229	4.86961	2.31458	2.89161	2.63531	2.22647	4.26095
ACH-000462	NALM1	NALM1_HAEMATOPOIETIC_AND_LYMPHOID_TISSUE	0.0761826	0.103808	0.111143	0.129908	0.059081	0.0917392	0.139372	0.071433	0.080524	0.10536	0.060217	0.0216365	0.0772419	0.0223638	0.0791766	0.0731356	0.0741394	0.132049	0.0647978	0.0592691	0.114556	0.0868298	0.0491807	0.0551284	0.146388	0.0484913	0.0595973	0.194092	0.0899472	0.124828	0.0863515	0.122892	0.0676887	0.0823689	0.11619	0.0649395	0.0476528	0.0916111	0.0639339	0.0649753	0.0868302	0.029975	0.125761	0.0875373	0.0739454	0.0829597	0.0640579
ACH-000466	SNU216	SNU216_STOMACH	3.71142	3.77518	1.91857	1.52224	2.74116	1.91927	3.22994	3.38886	2.71686	4.29778	4.84385	2.5631	4.11925	2.17226	5.87937	5.2347	4.49859	1.1412	3.99312	7.81603	3.71517	3.71328	3.759	5.83558	3.02034	2.73746	13.2446	8.19695	3.2934	2.16906	2.70346	3.93502	2.60298	6.05864	3.60871	4.63446	3.2012	2.65633	1.65306	2.282	3.09569	6.82838	1.34638	4.62262	3.70013	6.1297	1.81903
ACH-000467	HCC56	HCC56_LARGE_INTESTINE	3.02003	2.16131	3.4652	2.45899	1.54974	3.89678	3.02229	1.80691	2.42278	2.01715	2.63489	3.45668	5.04552	4.20383	3.2166	1.01427	2.24571	2.70773	3.25791	3.10675	1.70141	1.60368	2.9309	1.82886	4.03427	3.19721	6.02992	2.2154	3.78034	3.72427	3.10442	2.98324	1.9662	1.52876	2.52932	1.66211	3.86279	4.43918	3.12363	2.42142	2.24829	3.25893	1.03799	2.03197	2.12255	6.09265	3.43699
ACH-000468	PK45H	PK45H_PANCREAS	4.04666	3.28911	3.05934	4.06055	4.54349	4.89109	5.29676	2.42231	3.05986	5.76677	1.35872	3.61502	3.97403	1.66802	8.72515	2.17177	3.56588	9.61575	4.27356	3.03654	1.22639	2.55268	3.53345	2.7485	2.9886	3.08292	2.44916	5.95689	2.95059	2.88649	3.14336	2.86291	11.7424	3.53971	2.96828	1.68607	4.38144	1.40139	6.86244	5.7748	7.89443	5.46682	2.44277	2.34019	2.03681	3.68707	3.63768
ACH-000471	LI7	LI7_LIVER	3.08643	2.39687	2.00419	1.20764	5.49292	3.65931	7.79591	3.23678	3.90979	2.53862	4.40175	4.53554	4.43996	1.72215	2.80957	6.3688	3.71009	2.62791	2.01977	2.13676	3.40338	1.95493	4.08944	2.88304	2.57882	2.28148	0.898771	4.49088	1.41239	3.02661	2.08834	1.87186	4.10526	2.33819	2.10538	1.57778	5.09548	4.52545	1.96581	4.38449	3.4746	6.20912	2.14452	2.39022	4.49663	2.31589	1.48408
ACH-000477	MALME3M	MALME3M_SKIN	3.12618	4.60879	2.59318	5.15141	3.08061	2.69469	0.780011	2.17361	1.79603	2.04553	6.69579	4.18811	1.48775	3.85118	2.90438	2.92213	3.65426	3.86476	1.8817	3.87507	8.89672	2.24787	3.28451	2.16408	2.67145	3.38675	2.74459	2.72104	2.93563	4.95708	3.9951	2.64098	4.26403	2.80915	1.87413	1.97356	3.56233	3.08137	2.45482	2.70129	3.38942	2.31737	2.52306	1.49202	1.85438	2.00378	3.59737
ACH-000479	KNS81	KNS81_CENTRAL_NERVOUS_SYSTEM	3.97689	5.20511	4.0184	8.93131	4.65652	3.8472	3.0838	2.78088	2.97206	4.57784	3.034	5.03676	5.17564	2.94087	2.86699	6.32289	2.85296	7.30772	3.32424	6.25886	2.69313	2.95095	4.77373	2.87608	3.97462	4.12283	5.9487	3.82142	4.48841	4.34321	2.2603	4.11549	1.55041	6.82027	4.2655	1.38224	4.7532	2.13372	1.27506	3.26167	2.91408	2.93904	4.36581	4.06095	3.50244	4.23168	7.68356
ACH-000485	GSU	GSU_STOMACH	1.54032	2.16413	1.33178	1.47569	0.558215	1.87797	1.70277	0.583198	3.39709	1.22464	3.31903	1.80278	0.724476	2.55956	1.67164	0.389797	1.66893	1.15227	3.0413	4.44585	1.62858	1.42278	0.578674	1.35485	1.98855	1.20476	2.75497	1.30609	0.871464	5.63241	3.43886	0.972008	0.995209	1.68255	1.05971	1.20831	1.22628	1.73819	0.300822	1.06703	1.54648	1.31288	0.386269	1.42303	1.09825	1.92525	1.01795
ACH-000487	F36P	F36P_HAEMATOPOIETIC_AND_LYMPHOID_TISSUE	0.374576	0.18153	0.34517	0.234353	0.345019	0.358713	0.276911	0.337204	0.404653	0.217618	0.709563	0.915331	0.155733	0.795079	0.314488	0.422143	0.404283	0.121913	0.478636	0.497478	0.572634	0.77111	0.785387	0.224839	0.229425	0.227983	0.497582	0.469971	0.702625	0.098909	0.457941	0.272464	0.271985	0.465932	0.252228	0.706388	0.108976	0.291724	0.21452	0.481515	0.285591	0.477422	0.349677	0.283177	0.233275	0.501338	0.542574
ACH-000490	SF767	SF767_CENTRAL_NERVOUS_SYSTEM	2.19709	1.8236	1.38055	1.99254	2.47196	1.73622	1.76043	1.9704	1.98095	1.57101	1.71664	3.16939	2.74508	3.59041	2.72183	2.70847	1.0748	1.63505	1.23074	2.49915	0.879491	1.74046	1.64989	2.92025	1.78476	2.82586	1.70766	2.83031	1.32499	1.44061	2.26195	3.70674	2.32271	1.28114	1.69617	3.24608	1.54013	0.826412	4.34733	1.14542	2.03471	3.21653	2.04177	2.2593	1.32823	1.80267	2.6259
ACH-000492	MUTZ5	MUTZ5_HAEMATOPOIETIC_AND_LYMPHOID_TISSUE	0.153249	0.136593	0.164802	0.0955381	0.216888	0.106109	0.236481	0.170155	0.187317	0.141478	0.0583796	0.0813634	0.0476548	0.113093	0.101559	0.104191	0.280802	0.155381	0.207136	0.125709	0.10796	0.203537	0.257305	0.0659491	0.128734	0.113136	0.0943128	0.222545	0.147048	0.30472	0.13301	0.355672	0.104835	0.0720442	0.117193	0.039297	0.137057	0.227293	0.0751909	0.178871	0.100826	0.066088	0.173248	0.139484	0.198396	0.0641185	0.281858
ACH-000494	OELE	OELE_OVARY	2.35928	1.12951	2.94271	2.52466	3.58779	2.70234	2.41362	2.29901	1.30257	2.26958	2.30214	1.58278	2.38725	2.02144	1.4719	1.93951	2.91769	2.05222	2.32271	1.40583	1.62284	2.02489	2.78682	1.67182	3.05336	2.28129	2.56366	1.54675	2.54854	1.90965	1.45171	2.08871	3.05056	2.2294	2.67615	2.42788	2.07275	3.7637	1.62543	2.53077	1.43172	2.52048	1.88634	1.8313	2.81582	1.96703	3.09194
ACH-000495	TUHR4TKB	TUHR4TKB_KIDNEY	4.0121	1.36462	7.78496	2.44811	3.00879	4.92806	4.08142	2.94313	2.12774	3.50238	3.05735	2.28658	4.75091	2.06725	4.57444	6.55771	1.62209	5.85413	2.4895	1.22796	1.93988	3.22645	4.16342	4.0637	2.4776	4.18652	1.05795	3.02204	3.17191	3.55166	3.68239	2.37164	9.60069	3.59796	3.18491	1.00358	3.78909	3.63218	4.63379	1.53333	3.50024	6.27508	3.60861	4.18805	3.2068	1.34844	3.18803
ACH-000498	KO52	KO52_HAEMATOPOIETIC_AND_LYMPHOID_TISSUE	0.131562	0.100023	0.259557	0.0883488	0.067637	0.0485662	0.176186	0.157998	0.120257	0.159118	0.0667909	0.0526551	0.194849	0.204665	0.0412786	0.151516	0.236161	0.133577	0.0561918	0.183487	0.23637	0.124297	0.0554953	0.208483	0.194896	0.113109	0.104203	0.0751986	0.269185	0.0670944	0.108466	0.314186	0.131461	0.0887475	0.118695	0.0652193	0.116706	0.106872	0.189768	0.128062	0.195302	0.177087	0.164492	0.115796	0.133105	0.0876383	0.147961
ACH-000499	EW8	EW8_BONE	0.72694	0.547011	0.566338	0.655523	0.636621	0.676231	0.300901	0.301499	1.06025	0.667381	0.443482	0.81876	0.897356	0.792863	0.37156	0.748593	0.566285	0.885626	0.686189	0.569179	0.575646	0.54015	0.580594	1.23532	0.656617	0.968704	1.02411	0.737414	0.713827	0.912465	0.270746	0.776264	0.603479	0.413248	0.897846	1.26407	0.468545	0.427786	0.853072	1.2028	0.907361	0.933905	0.585315	0.469987	1.69977	0.881852	1.09997
ACH-000500	SNU46	SNU46_UPPER_AERODIGESTIVE_TRACT	2.24644	2.17055	1.8567	1.99205	2.07167	0.8765	3.52329	2.38116	2.15275	2.38478	2.76276	2.20757	1.34942	2.4415	1.63222	2.26159	2.47072	1.78924	2.13363	2.6661	1.24011	1.86172	3.51591	1.61573	2.10134	2.22906	4.55897	1.49681	3.18071	2.15319	1.51043	2.55355	1.79631	3.0331	2.20526	3.42821	1.35978	1.26657	1.94593	1.52991	1.25787	1.28409	2.30901	2.28385	1.50741	2.59869	4.08598
ACH-000502	TCCPAN2	TCCPAN2_PANCREAS	3.88444	2.02445	2.27385	2.66045	4.1375	4.15675	3.97673	2.73991	5.12964	5.6349	4.66182	4.10275	1.05183	3.00766	6.10426	2.33936	8.07456	2.49558	5.88464	3.36964	3.56731	4.51387	3.53491	3.55725	3.97703	1.54434	4.07955	9.65665	3.07679	6.89798	6.6788	1.48693	4.47897	3.17753	5.05382	3.95111	4.22648	3.92785	1.0415	3.65591	4.1408	3.55524	1.0806	2.84089	3.6805	9.59916	3.67451
ACH-000503	BICR16	BICR16_UPPER_AERODIGESTIVE_TRACT	2.54343	2.93593	2.41953	2.39982	1.76466	1.91588	3.56521	2.4883	2.62629	1.46319	2.45424	0.927557	2.47743	2.74763	3.5397	2.31183	2.44421	1.71897	3.73263	3.00837	2.29192	3.09267	2.11152	1.55577	3.1392	1.36852	2.36514	2.0399	2.90207	2.40023	2.98047	2.65161	3.48539	1.6357	2.09784	2.58797	3.68514	1.32772	2.95126	2.46939	1.52155	2.20369	2.34359	2.00653	2.95367	4.34553	2.12795
ACH-000507	KE39	KE39_STOMACH	2.43395	1.82384	2.23231	6.06859	1.50489	2.88051	0.602682	1.29598	2.52601	1.27047	3.90712	1.18308	0.812434	4.86699	3.78951	1.78229	2.47315	3.06816	3.8621	4.7816	2.2752	2.48362	1.3699	5.35138	3.37999	2.10651	6.57463	3.71156	1.16583	4.47136	2.82086	1.51542	2.78756	2.47095	3.44801	1.43738	1.47981	0.930431	2.08536	0.72379	3.08121	2.91818	0.975958	2.45392	1.95638	8.57218	1.37904
ACH-000509	HUT78	HUT78_HAEMATOPOIETIC_AND_LYMPHOID_TISSUE	0.213388	0.140429	0.0968769	0.177177	0.325505	0.0747788	0.104166	0.277824	0.121597	0.189817	0.397639	0.567371	0.417863	0.267205	0.125225	0.340828	0.420393	0.0481392	0.0544776	0.171498	0.134652	0.208262	0.462541	0.107774	0.115769	0.135493	0.139689	0.0804893	0.336394	0.447672	0.10229	0.196078	0.180576	0.0701277	0.0875877	0.343755	0.245129	0.0966813	0.0818086	0.110416	0.476232	0.274943	0.076758	0.294292	0.253794	0.129437	0.19857
ACH-000511	CALU1	CALU1_LUNG	3.0955	1.74782	1.96302	2.7571	2.95206	3.66673	2.30348	2.46732	2.5184	4.30043	1.47473	3.66592	7.50872	3.8377	2.60703	3.548	4.92953	5.60685	4.90697	4.77293	3.30517	5.06016	4.8375	1.82332	3.01741	3.2942	3.28953	2.04341	4.58283	3.66444	1.77586	4.66747	3.00633	1.50685	3.52712	3.46427	3.08533	1.15128	2.81197	3.57492	4.6742	4.76073	2.19487	2.7267	5.02096	1.89504	2.45099
ACH-000512	INA6	INA6_HAEMATOPOIETIC_AND_LYMPHOID_TISSUE	0.149647	0.165785	0.112506	0.218067	0.180933	0.0719733	0.178353	0.246148	0.159934	0.178233	0.329029	0.165511	0.186075	0.135944	0.0754709	0.396527	0.114566	0.127208	0.15909	0.187077	0.264033	0.338225	0.0784926	0.152334	0.0761641	0.152516	0.249076	0.126506	0.204653	0.0725583	0.141797	0.0901907	0.146637	0.0361925	0.124578	0.231915	0.0503229	0.145699	0.122951	0.109558	0.300451	0.185533	0.0828739	0.245053	0.143918	0.157294	0.240826
ACH-000513	SNU1272	SNU1272_KIDNEY	4.14312	1.65854	5.44781	1.84452	3.08602	7.741	3.29713	2.64197	3.90127	5.60714	2.33694	6.31774	3.35485	2.79622	5.19563	5.4349	3.08623	4.88198	3.1969	3.80693	1.19608	6.87543	4.81859	4.41645	3.68916	5.40586	3.1134	3.58781	2.92632	3.49535	3.02095	3.80071	3.3577	3.64749	3.8891	1.97561	4.99924	6.4249	5.11395	1.14355	3.72032	4.69727	3.1525	5.56556	4.71445	1.16107	3.20231
ACH-000515	HCC33	HCC33_LUNG	0.782852	0.635911	0.70897	1.21155	1.21054	0.617967	0.704074	0.662061	0.300245	0.825573	0.148504	0.330207	2.15597	0.340614	0.835811	1.3198	0.596463	2.11073	0.190184	0.317565	1.12299	0.150058	0.497856	0.857449	0.536438	1.32055	0.245998	0.76999	0.581096	0.259876	0.761954	0.494801	0.959402	0.842289	0.499144	0.582144	0.545952	0.121942	0.658099	1.00487	1.24596	0.620171	1.41064	0.414526	0.308202	0.189897	0.196777
ACH-000517	SNU410	SNU410_PANCREAS	4.0387	2.23968	2.74552	3.99375	3.53544	3.62908	4.26604	4.85115	4.78185	4.57327	1.99775	5.1481	1.48647	4.5554	4.31878	1.79662	2.96859	5.29403	4.18822	5.22129	3.42862	3.36849	4.44193	2.44549	4.53443	2.05116	3.45918	3.85998	7.94496	4.13585	5.81805	3.31028	7.44874	3.40622	2.97828	2.7663	2.68059	2.4759	4.09083	6.52901	7.95759	8.2617	2.10975	3.25408	3.49056	5.70995	10.0677
ACH-000519	PEER	PEER_HAEMATOPOIETIC_AND_LYMPHOID_TISSUE	0.116992	0.243055	0.0925524	0.122343	0.0973864	0.0802811	0.163044	0.0200047	0.0654904	0.101442	0.260658	0.113579	0.170053	0.037574	0.0645807	0.0454503	0.161632	0.0705978	0.061515	0.175657	0.0781002	0.100249	0.11413	0.105831	0.0628353	0.0925282	0.112797	0.269954	0.0676177	0.430026	0.10179	0.0878788	0.111973	0.420594	0.0281044	0.282899	0.0637396	0.0223623	0.133211	0.0951301	0.0526223	0.103863	0.115618	0.270635	0.140735	0.102026	0.038191
ACH-000520	59M	59M_OVARY	2.06602	2.87654	2.09664	1.95137	2.23977	1.87615	3.42544	1.34815	2.35046	1.69567	2.38028	2.00248	1.43799	1.3733	2.30804	0.670091	1.62959	2.41751	1.8963	1.07954	2.44756	1.83627	2.16211	1.66125	1.10083	2.19824	1.125	1.9643	2.02145	1.77672	1.38029	1.43126	2.45862	2.44341	1.31786	3.63997	3.21359	3.71141	2.58626	2.88121	2.27337	2.67302	2.55168	1.39308	1.04042	1.24329	2.13781
ACH-000523	NCIH1184	NCIH1184_LUNG	1.04776	1.28634	1.00664	1.41107	1.90973	0.620338	2.27076	0.727471	1.31638	1.21519	0.471551	0.883448	1.87313	0.793001	0.965208	1.40419	0.404028	1.20173	0.387943	0.369237	0.886509	0.436243	1.02708	1.89293	0.650259	2.64846	0.919669	1.89282	0.738511	0.734652	0.871005	1.02338	1.97778	0.442915	0.814739	0.767758	0.741077	0.451942	2.01009	1.22764	1.02071	1.02545	1.29996	0.648983	0.235044	0.850968	0.470289
ACH-000525	NCIH2171	NCIH2171_LUNG	0.60235	0.924703	0.519304	0.117266	0.811207	0.458304	1.14082	0.488349	0.586822	0.831706	0.153152	0.398404	0.630484	0.44229	0.830566	0.968602	0.321168	0.961829	0.329071	0.178355	0.772322	0.312543	0.566955	1.47418	0.762985	1.2683	0.218822	0.865189	0.59493	0.581829	0.511805	0.497691	0.432742	0.956021	0.147048	0.512317	0.50652	0.237864	0.587293	0.780468	0.417544	0.709888	0.617944	0.294963	0.308506	0.500455	0.235816
ACH-000526	HS821T	HS821T_FIBROBLAST	7.51543	7.64533	6.42473	6.84166	4.52094	5.16338	6.67131	7.51147	10.4382	7.04624	8.87331	6.48835	4.83748	10.6031	2.19936	4.02123	7.32311	9.51584	17.407	8.32141	4.43765	5.4462	8.73607	3.70622	10.8571	6.54716	6.47324	5.11488	29.6784	3.9027	10.7768	4.77635	8.84749	4.70849	3.93659	3.08075	15.3842	19.1804	3.35778	14.384	9.40313	4.69116	5.78085	7.88836	5.56787	8.16033	10.9393
ACH-000529	T173	T173_FIBROBLAST	5.24379	4.89939	6.10636	8.89549	5.72835	6.24355	4.10321	4.14374	5.7532	6.79643	6.21785	4.6367	3.36088	3.0424	4.29022	2.68895	4.42153	4.40881	5.29065	6.8062	2.93304	7.10833	5.18947	2.19981	5.38198	4.4794	9.39604	3.91253	11.2862	2.23122	7.53944	3.9521	4.49202	4.75985	4.91049	3.26949	8.37122	8.35001	2.26532	6.38122	3.16944	2.17632	4.49635	4.89964	2.53229	5.4862	6.28666
ACH-000531	RS5	RS5_FIBROBLAST	4.93049	3.50208	6.17439	7.7864	2.87781	1.59091	5.90574	4.11221	6.1285	3.88435	5.15035	3.16368	3.4503	8.90763	4.71334	4.24429	5.23038	3.76655	5.16008	7.84947	4.03781	3.36521	4.58515	2.21133	6.97571	3.55425	4.06131	5.13435	4.35437	4.46545	5.33716	3.26564	4.87366	3.3481	5.22471	3.14413	7.5991	11.0273	2.07754	4.14057	6.43556	2.92094	3.83275	4.55251	5.82243	8.54487	9.67648
ACH-000533	NCIH2004RT	NCIH2004RT_SOFT_TISSUE	2.21271	1.4655	2.69208	2.00649	4.53049	2.14003	1.26395	3.65915	2.62737	2.53871	0.944255	3.49567	2.57671	6.66433	1.51275	4.32702	4.12947	0.837931	1.7005	3.71275	2.17949	1.73618	2.60762	3.24648	1.02316	4.47141	2.52019	0.932417	1.50878	2.39786	0.831919	1.67405	1.65584	1.04538	1.22566	2.74937	2.36797	4.91911	2.34756	1.10792	2.61631	3.56985	1.23012	1.66979	1.92012	0.635831	2.57171
ACH-000537	SNU761	SNU761_LIVER	3.18594	1.48718	1.91412	1.50826	3.87944	4.35196	3.45639	1.29528	1.89707	2.06923	0.541064	2.42774	6.32639	1.81571	3.80836	3.71705	3.53194	2.51845	1.40356	4.37263	2.53058	1.27752	5.20592	3.1563	4.11706	3.438	0.985966	2.8408	1.73403	2.37435	3.97664	2.72691	2.12514	4.06304	1.8498	1.98766	2.45852	1.91017	1.8865	2.35423	1.94935	7.00035	2.41835	2.3737	11.0866	1.67469	2.83171
ACH-000539	HS618T	HS618T_FIBROBLAST	4.76123	6.94833	5.45422	5.35233	6.89183	3.31925	3.44155	2.29251	5.55274	5.57424	8.79388	3.92223	5.65215	6.76872	5.43649	1.68644	6.5163	2.28212	4.49219	6.54411	4.03117	4.12956	3.65316	1.36542	8.24514	4.1044	5.65614	3.38714	4.78674	5.7156	6.16207	4.17633	3.27018	2.59114	5.27404	4.31678	5.02139	7.30192	2.13036	3.74066	9.78321	2.66657	2.50111	3.64702	5.8357	4.1926	7.12789
ACH-000540	HS606T	HS606T_FIBROBLAST	4.42	4.8283	3.90277	5.66883	4.58996	4.10848	2.72028	3.06715	2.18999	5.60788	3.60959	3.18484	2.74649	6.00473	3.36389	2.08792	5.19418	1.91151	3.16394	6.57081	3.49473	3.47521	2.01953	1.79408	7.36519	3.79117	10.1875	2.99326	4.13746	2.40632	6.18992	3.13649	2.99349	3.39891	5.81207	4.22535	5.4492	8.71453	2.06253	3.05736	6.66998	2.26295	3.07287	4.75352	1.99173	5.85551	4.5476
ACH-000541	KMS34	KMS34_HAEMATOPOIETIC_AND_LYMPHOID_TISSUE	0.232414	0.282873	0.324455	0.486129	0.161058	0.226568	0.297628	0.267379	0.132063	0.260009	0.216542	0.178936	0.344501	0.124063	0.112341	0.136515	0.156985	0.255279	0.0813772	0.138296	0.193243	0.207191	0.076949	0.164738	0.180086	0.213914	0.0965096	0.150921	0.154971	0.264437	0.236998	0.135196	0.441578	0.0845315	0.128653	0.348941	0.149102	0.171831	0.194487	0.204627	0.373385	0.126025	0.0920519	0.222367	0.383382	0.407802	0.232456
ACH-000542	HEYA8	HEYA8_OVARY	0.949495	0.590202	0.829492	1.19726	1.18948	1.09066	1.47344	1.00356	0.783616	1.44058	0.296536	0.51166	0.554022	0.947523	0.985694	1.41907	1.49378	0.882463	0.81708	0.511046	0.80548	0.963107	0.588617	0.673629	0.756063	0.373911	1.15138	0.517488	0.741625	0.854761	0.518666	1.32452	1.03501	1.82619	0.831322	0.802657	0.783432	1.27524	0.528187	1.06078	1.1172	1.24395	0.934741	0.786521	1.81182	0.963985	0.765932
ACH-000543	SNU489	SNU489_CENTRAL_NERVOUS_SYSTEM	6.61791	8.73767	7.33612	4.61442	6.2521	7.17343	6.33571	10.2658	5.98322	7.79163	5.10795	4.7542	6.60484	10.7252	4.58712	10.4815	3.82134	6.7693	3.09031	4.24621	5.24339	4.11196	8.67463	8.30723	7.43737	8.13443	3.16781	6.45356	5.62761	2.80565	3.83236	5.47463	18.4354	6.16344	6.86181	3.62724	6.06859	5.91301	15.8648	4.87503	5.22561	13.1065	8.3043	8.49984	5.02434	6.62791	6.99543
ACH-000549	SNU1076	SNU1076_UPPER_AERODIGESTIVE_TRACT	3.66091	3.52353	3.21846	3.76678	2.75948	2.49298	3.51052	3.61526	2.35753	3.83972	6.96392	2.39505	1.6133	2.18383	1.8952	4.45318	3.1949	4.60082	1.91388	3.21261	2.18208	4.00311	2.80566	6.07261	4.77189	3.75719	5.08606	9.31204	2.05716	1.9675	3.84628	2.88088	3.33563	1.98714	3.84328	5.37029	2.50567	2.75572	3.0488	3.54085	1.02531	5.55061	3.04865	9.1436	6.55017	6.39978	2.74534
ACH-000550	IGR39	IGR39_SKIN	3.61698	3.93791	2.93536	2.02619	3.2784	5.18817	3.52468	3.06524	2.95376	5.73963	4.36146	5.20194	2.09961	3.15256	2.96477	2.0994	5.8712	2.64054	4.15842	4.57725	2.01713	2.20475	5.50939	2.6613	5.0851	3.99577	5.72245	4.46287	2.73262	2.02541	2.20327	2.10825	3.75298	2.87139	3.97487	5.01155	3.37028	4.12846	2.92359	4.37338	4.17701	3.24207	1.49583	2.92756	5.00787	6.92797	4.73812
ACH-000553	SQ1	SQ1_LUNG	5.90572	4.7267	4.33809	5.09823	4.2778	3.17199	6.02449	7.54938	6.76717	6.80573	6.6565	2.71862	4.38603	3.97119	4.36789	3.81477	4.70735	15.6107	4.48118	2.52471	3.11093	4.15046	4.9855	6.07431	3.93302	2.52029	2.29819	9.82644	4.7028	3.91745	5.04116	3.84959	16.0992	4.79293	3.70977	3.09152	5.86969	4.46904	11.7375	6.08385	9.4832	8.60622	7.69373	6.44768	4.83914	2.8922	5.66074
ACH-000555	A498	A498_KIDNEY	1.77601	1.82369	1.37535	0.876421	1.48455	1.88843	0.758662	1.02926	1.14405	1.4393	1.49537	1.39844	1.12401	0.875213	0.955246	2.79161	1.54065	1.36535	1.03707	1.11751	2.23649	1.12291	2.18855	2.42799	2.05563	1.55566	1.83092	1.66415	1.11255	1.21584	1.36738	1.32679	2.05585	2.02982	1.77646	1.05704	1.98872	2.22472	1.38448	1.56378	1.65031	2.73534	0.769508	1.77227	4.19114	1.80453	1.63358
ACH-000557	AML193	AML193_HAEMATOPOIETIC_AND_LYMPHOID_TISSUE	0.206285	0.236677	0.163377	0.18016	0.200307	0.0558913	0.180508	0.151074	0.22623	0.226235	0.344514	0.451719	0.129066	0.24803	0.0903194	0.266911	0.240916	0.0781492	0.0668106	0.227525	0.32871	0.132285	0.113168	0.264265	0.126061	0.203737	0.116811	0.218639	0.308426	0.272226	0.0912014	0.329569	0.471345	0.188149	0.0961074	0.247598	0.0805941	0.491176	0.180663	0.26969	0.180287	0.176643	0.30441	0.263507	0.328832	0.0887093	0.0603156
ACH-000564	KHM1B	KHM1B_HAEMATOPOIETIC_AND_LYMPHOID_TISSUE	0.302741	0.637819	0.172782	0.271778	0.31583	0.102443	0.783313	0.0928342	0.166986	0.289709	0.301609	0.222183	0.185022	0.128734	0.182677	0.133032	0.111063	0.106974	0.217784	0.187176	0.285841	0.251204	0.236604	0.252068	0.249475	0.467579	0.344218	0.192237	0.199721	0.20442	0.175995	0.202122	0.525656	0.338223	0.194054	0.208895	0.24082	0.120736	0.280627	0.187629	0.198914	1.30071	0.395615	0.347391	0.172327	0.278151	0.153454
ACH-000568	UACC812	UACC812_BREAST	4.81607	2.96457	6.94163	11.5483	3.0763	1.74801	3.84508	5.85566	3.37803	6.93114	6.02944	2.70401	4.86078	4.12005	1.78947	3.485	3.34312	6.28758	5.03486	4.52172	3.83656	2.27061	3.40298	4.23424	7.2978	6.11382	13.3507	3.66195	12.3699	2.3953	3.18382	4.90046	3.87541	2.04078	5.80127	4.11108	4.37154	5.0238	3.48305	3.63981	4.41427	4.49095	6.81798	5.21959	4.98868	7.49617	5.89027
ACH-000575	HCC364	HCC364_LUNG	2.47742	1.17575	1.86577	1.7829	1.36117	4.00939	1.31321	2.27105	3.23624	4.49478	0.577811	3.89088	1.82924	1.96947	1.99119	1.80479	1.94242	5.15127	2.43871	1.56961	1.91845	2.43616	2.35381	2.68369	3.16369	2.48769	1.92786	2.64278	2.81682	3.68598	2.01068	1.93567	3.27532	1.58135	2.4815	2.53767	2.79573	1.28969	3.05246	3.15427	5.23394	1.74657	2.0757	1.79863	4.41071	1.84637	2.71745
ACH-000576	KMS27	KMS27_HAEMATOPOIETIC_AND_LYMPHOID_TISSUE	0.165058	0.0857866	0.0716672	0.17097	0.245862	0.0822669	0.170425	0.162117	0.227891	0.164978	0.243007	0.139557	0.145817	0.152902	0.278756	0.480754	0.131994	0.0943196	0.235549	0.152868	0.185889	0.269141	0.06235	0.201087	0.16146	0.133193	0.112246	0.220588	0.0537815	0.115337	0.110649	0.0451629	0.159278	0.0616829	0.0709663	0.251114	0.197816	0.172955	0.116616	0.130672	0.112173	0.110717	0.329433	0.281326	0.325336	0.173057	0.192234
ACH-000578	HCC1171	HCC1171_LUNG	4.13562	4.52533	3.74152	3.5787	5.79478	1.44075	3.52852	4.12158	2.0405	2.97711	4.36537	3.1549	3.86226	2.4182	2.87607	4.32305	3.36743	5.0037	4.22033	1.81602	2.37219	2.4891	4.06983	5.29616	3.9433	7.40793	3.49323	7.86387	4.80887	3.52648	2.99517	3.40229	6.24907	6.35345	3.41263	5.98755	5.02086	5.44613	5.23878	3.18539	2.56635	2.25215	3.04206	4.40015	2.78973	7.47355	3.74481
ACH-000582	COLO741	COLO741_SKIN	1.5741	2.05305	0.929037	1.33865	0.937623	1.69737	1.86826	0.760449	0.548565	1.22609	1.80685	1.99835	0.479443	0.79563	1.41241	0.282407	1.1484	1.2855	1.62337	1.82244	2.40567	0.94588	2.18013	1.90841	1.78712	1.35593	1.90081	2.81029	0.707689	1.64678	1.65794	1.21898	2.56921	2.92281	1.32546	1.11769	1.00647	0.924154	1.02497	2.88374	1.12431	2.42275	1.54349	1.45389	2.3438	3.20403	0.965423
ACH-000588	KMS26	KMS26_HAEMATOPOIETIC_AND_LYMPHOID_TISSUE	0.320532	0.227057	0.292491	0.44736	0.187845	0.718767	0.389974	0.484148	0.204019	0.320727	0.520504	0.3599	0.128109	0.3327	0.128403	0.147548	0.47786	0.128149	0.412402	0.389792	0.205702	0.644447	0.417923	0.331711	0.276539	0.293815	0.378588	0.471533	0.276654	0.261397	0.227668	0.11718	0.376805	0.0649587	0.253219	1.00146	0.156145	0.127049	0.293054	0.16175	0.980561	0.388442	0.366002	0.719897	0.250562	0.501779	0.555881
ACH-000590	NCIH2073	NCIH2073_LUNG	3.75727	1.55857	2.01997	3.21033	4.19779	2.86041	2.32573	2.68831	5.00323	2.90452	2.9551	7.47738	3.52549	5.75467	2.15063	1.51853	5.85644	2.39962	4.26672	2.78671	3.76197	4.94768	6.33399	2.406	6.47891	2.89614	3.1143	2.46812	8.02935	6.41607	8.04457	1.73465	4.24057	1.88468	4.13824	6.66702	5.07206	3.57363	5.13037	3.8579	5.12047	4.58174	1.3668	2.75834	2.85804	3.6538	4.63823
ACH-000591	LN235	LN235_CENTRAL_NERVOUS_SYSTEM	3.50572	2.65854	3.00893	3.12751	3.39128	4.15016	2.27309	2.59418	4.10885	4.36129	1.42515	6.79936	4.08212	3.88953	3.38909	4.41745	2.72789	3.13117	2.18196	3.85254	3.3573	2.54055	4.32121	2.54139	5.66613	4.92747	3.47193	3.24509	3.63963	2.0755	3.256	3.58474	2.71852	2.87103	3.28823	4.03195	3.6914	3.6228	3.6366	4.15992	4.01454	2.86815	2.44152	1.65962	4.44118	4.92469	5.0856
ACH-000592	TM31	TM31_CENTRAL_NERVOUS_SYSTEM	1.69509	0.693536	2.28727	1.34008	1.27604	1.99187	2.37069	0.854969	1.38066	1.21418	0.612997	1.71807	2.3016	6.06933	1.36161	3.70398	2.89782	1.40253	1.77529	2.18263	1.11699	1.61287	1.71014	1.50121	1.27094	2.24326	0.785421	0.886932	1.13599	1.89664	1.77402	1.50181	1.01788	0.995453	0.935433	1.24145	1.06931	1.43898	1.07174	2.26447	1.38606	1.49955	3.29606	1.58471	6.78505	0.99484	1.54409
ACH-000593	BC3C	BC3C_URINARY_TRACT	1.49376	1.34672	0.815795	0.513192	1.41407	1.79147	1.78213	1.24086	1.14869	1.10265	1.89655	1.11462	1.59412	1.59586	1.74124	3.89152	3.92013	0.467279	2.57779	1.10061	1.54847	1.429	2.56185	2.19213	1.64748	1.16895	1.61813	1.15435	1.12132	0.633281	0.323623	1.3012	0.346285	1.36405	1.45321	1.96238	1.54478	1.14381	0.75789	1.29259	1.55428	1.59396	1.17536	1.27893	4.36635	2.61739	0.840297
ACH-000594	DMS153	DMS153_LUNG	1.85439	2.06177	2.44199	5.41563	2.71798	1.42116	1.08538	2.42497	2.26746	1.19513	1.93849	1.63984	1.57328	1.39616	1.18166	2.02384	1.27039	3.96114	1.15884	1.66223	0.658134	1.64404	2.00441	1.45587	1.0696	1.50791	2.41088	1.44632	1.68999	0.931268	0.9012	1.60379	2.18628	0.723407	2.96336	1.20738	0.935327	1.70406	2.27268	1.87979	1.3345	1.09173	1.49361	1.30362	1.65533	1.43176	1.06038
ACH-000597	TTC709	TTC709_SOFT_TISSUE	2.06874	1.34027	2.79355	6.97657	2.7889	0.93962	1.47721	2.16168	2.8105	1.92176	2.82864	4.46804	1.22784	2.69703	1.52566	1.60628	2.51152	1.82004	0.875708	3.3993	1.56855	2.46652	2.47	0.988817	0.950946	1.57708	3.69169	1.5162	2.10405	4.87514	2.03482	1.31464	1.07844	1.36735	0.999276	2.4632	1.12744	2.42472	2.40275	2.292	1.91719	1.80937	1.76673	1.88906	0.942232	2.74425	2.62352
ACH-000598	KMS21BM	KMS21BM_HAEMATOPOIETIC_AND_LYMPHOID_TISSUE	0.295877	0.471762	0.161417	0.191714	0.351246	0.0900825	0.584121	0.136367	0.1312	0.325046	0.167473	0.268807	0.510679	0.148008	0.228305	0.213572	0.124605	0.0817095	0.329537	0.325887	0.396522	0.404707	0.328109	0.256538	0.185151	0.173684	0.350987	0.180984	0.277417	0.213596	0.113954	0.137847	0.167264	0.354461	0.187406	0.13203	0.298651	0.111103	0.341312	0.21474	0.403877	1.32287	0.442626	0.331359	0.0845529	0.187003	0.290267
ACH-000600	SLR26	SLR26_KIDNEY	2.27672	1.94025	1.8277	2.717	2.46566	3.26027	0.899014	1.32819	1.13597	3.35881	1.38883	4.50986	3.29064	1.43576	1.15369	2.7288	1.95817	1.42789	0.836738	2.89252	1.47934	1.63727	3.91792	5.19932	2.85554	4.47268	1.94914	2.02888	1.37478	0.913046	2.11629	1.66934	1.8804	1.02696	2.01067	2.51376	2.62342	0.81304	2.56573	0.863537	3.19288	5.31531	2.44127	2.92315	3.02591	1.77275	0.891517
ACH-000602	M07E	M07E_HAEMATOPOIETIC_AND_LYMPHOID_TISSUE	0.242072	0.125673	0.152707	0.0983599	0.203697	0.354806	0.111674	0.22452	0.227893	0.193329	0.285645	0.450978	0.13882	0.373493	0.0755501	0.342352	0.114479	0.160963	0.287554	0.0591004	0.333963	0.210385	0.329708	0.156945	0.273855	0.162034	0.207787	0.109304	0.894838	0.365997	0.321888	0.191358	0.141189	0.116067	0.106761	0.19837	0.117952	0.240874	0.173693	0.191832	0.278785	0.15677	0.0759532	0.188998	0.115573	0.30601	0.546617
ACH-000604	KYO1	KYO1_HAEMATOPOIETIC_AND_LYMPHOID_TISSUE	0.838596	0.600372	0.271451	0.421356	3.00285	0.785401	1.43351	0.607666	0.876006	0.364836	1.62323	0.969765	0.462125	0.732727	0.566147	0.313286	1.37159	0.45776	1.11286	1.00347	0.253692	0.643373	1.18098	0.146357	0.400263	0.553446	0.52153	1.11083	0.823736	2.34867	0.275913	0.161648	0.421889	2.00402	0.819319	0.869801	1.12921	0.820005	0.555786	0.623844	0.778559	1.44973	0.352093	0.526097	0.422096	1.0301	0.703228
ACH-000606	PECAPJ34CLONEC12	PECAPJ34CLONEC12_UPPER_AERODIGESTIVE_TRACT	1.49725	0.89105	1.07488	0.580399	1.06106	1.48082	1.4312	0.962535	2.06598	1.41294	0.932242	1.09061	0.463321	2.51082	1.1847	1.69242	2.01619	1.08434	1.52072	2.28853	1.25279	0.890636	0.567743	1.70175	1.62293	1.61909	0.912048	1.90166	1.71617	1.49322	2.43817	1.07393	1.22757	2.19977	0.816174	1.59671	2.36846	0.758892	1.37436	1.40703	0.652672	1.08599	0.915645	0.87119	1.3401	1.01338	4.59689
ACH-000608	COV644	COV644_OVARY	2.96158	2.05821	3.09697	1.91546	2.02848	1.84413	4.31675	2.49197	3.78516	1.40933	2.38164	1.79418	2.73026	3.32782	5.07298	1.81307	2.06245	4.21307	3.64901	3.51496	3.50819	7.78164	3.16766	2.14129	3.13698	1.75888	2.67734	2.42821	3.3537	6.70853	3.28209	4.76971	3.51188	4.09744	3.41111	1.16662	3.19244	3.20918	1.64264	5.022	1.6903	2.52633	1.72591	2.74203	4.78338	2.1675	2.07874
ACH-000612	HUT102	HUT102_HAEMATOPOIETIC_AND_LYMPHOID_TISSUE	0.177892	0.0707306	0.120761	0.0880147	0.220017	0.382625	0.0798132	0.343347	0.163106	0.0953012	0.0841388	0.202613	0.206922	0.229742	0.052084	0.136093	0.192375	0.0563049	0.0985887	0.361595	0.198239	0.19469	0.401808	0.0808469	0.0853086	0.135328	0.158985	0.141378	0.348635	0.386052	0.253926	0.0629238	0.101516	0.0417155	0.25639	0.154253	0.240172	0.263894	0.11457	0.0403711	0.501782	0.207055	0.122769	0.135152	0.0765072	0.133012	0.370134
ACH-000618	SNU1041	SNU1041_UPPER_AERODIGESTIVE_TRACT	2.87653	2.49107	4.92054	4.13642	2.39845	1.43452	2.42837	1.92512	2.23812	2.13207	3.51479	2.32769	2.91224	3.01784	3.25342	3.43077	2.67717	2.6005	3.40648	2.63295	2.10902	2.06794	3.46235	2.62008	1.97042	2.3717	2.38436	5.17556	2.06013	3.78532	5.39954	3.82121	3.00357	1.63062	2.64431	2.45943	2.69681	2.93343	3.37455	3.11883	1.69563	0.998706	2.44007	3.5325	3.94411	1.38512	4.62986
ACH-000623	SNU201	SNU201_CENTRAL_NERVOUS_SYSTEM	5.40286	1.69984	4.80677	4.25177	5.58597	6.71453	4.42316	4.05428	5.17957	4.49961	3.69043	5.2119	7.59674	6.29162	4.92289	8.987	5.16365	5.77169	2.51328	6.1531	4.47656	3.38379	6.86584	5.42607	5.46227	4.65492	2.63535	5.48984	3.41153	4.34592	3.16992	6.02862	8.73478	5.5075	5.6199	1.30437	7.65169	4.33903	8.13694	4.31981	5.12321	6.30933	5.89212	4.51333	5.68431	5.14984	10.6873
ACH-000629	IOMMLEE	IOMMLEE_CENTRAL_NERVOUS_SYSTEM	0.934682	0.566515	0.509208	1.17951	0.442338	0.921853	0.566844	1.00952	0.632055	1.47164	0.939739	0.873648	1.32125	1.30837	0.979778	0.587686	2.01709	0.775579	2.23224	1.06267	0.681502	1.4016	1.88282	0.618437	1.38857	0.496134	2.19725	0.960184	1.7318	1.22984	0.918889	1.12691	0.547762	0.249404	1.81767	0.387144	0.430002	1.39611	0.804459	1.07532	0.628301	0.375693	0.589163	1.04581	0.695829	1.29533	0.939993
ACH-000630	YD8	YD8_UPPER_AERODIGESTIVE_TRACT	2.80478	2.323	2.90388	5.55884	1.88556	2.38991	2.93589	1.87322	2.44048	2.12221	1.6264	1.07344	1.70516	2.26732	3.65918	2.78154	3.29383	3.3535	1.38971	4.00789	2.30047	2.60528	3.14179	2.85923	2.29935	1.81583	2.18589	4.69616	2.46937	2.07629	2.45293	2.60373	3.50725	6.12455	2.56283	1.92443	2.98858	3.16939	1.15858	1.83548	1.46435	1.04339	2.60288	1.33318	1.75951	3.64227	4.6541
ACH-000632	HS944T	HS944T_SKIN	2.51636	5.7267	1.74531	1.80481	2.35207	1.96607	4.25721	2.58695	3.0341	2.09949	3.17843	2.05949	2.23868	2.47532	1.57135	1.83713	2.13842	1.58577	1.74391	4.97581	1.97274	1.92107	2.15671	1.85208	1.67535	2.54463	3.43347	3.40833	1.80771	1.52314	1.52451	4.81436	3.67426	1.71671	2.03933	3.18485	1.53144	2.64623	3.5173	3.02895	3.83194	2.26986	3.13413	2.11894	2.15395	3.68738	2.17442
ACH-000634	LN340	LN340_CENTRAL_NERVOUS_SYSTEM	3.46394	3.12814	2.38355	2.50016	4.13799	4.4206	3.79188	2.22209	3.47761	4.41774	2.04326	3.26973	2.96641	2.23013	3.09112	4.6412	2.45833	2.9818	1.81872	4.34853	2.40399	1.32304	4.87932	2.54098	2.4926	3.51755	5.8597	4.21824	3.26818	3.25687	1.71276	2.49794	2.62561	3.34876	5.10285	2.20369	4.72619	1.60823	4.23478	3.0618	3.05688	2.26272	3.29812	2.26017	3.5791	8.94707	6.32607
ACH-000635	SNU119	SNU119_OVARY	3.92931	4.70691	5.08086	2.92059	1.5657	2.14245	4.78469	2.89088	2.98994	3.88735	4.00142	3.46175	2.75869	3.26118	1.98867	0.794112	1.98261	3.08254	3.9819	2.82708	3.65952	4.4677	1.85544	1.68723	3.6302	2.30429	3.73239	3.97042	5.10868	6.64393	6.30916	6.93284	4.627	6.71055	2.49291	3.19171	4.14509	7.46742	1.98336	5.37893	1.78339	1.84255	2.89517	4.69268	6.40219	3.55861	5.8559
ACH-000642	HMEL	HMEL_BREAST	1.96839	2.98288	1.72616	2.91667	1.38687	2.47547	0.966607	1.71601	0.847851	1.68863	1.43809	1.13494	2.56566	1.60328	1.12151	2.57143	2.42357	2.01289	1.54162	1.10428	1.54654	1.04639	1.76045	1.45166	1.86284	2.14915	2.22224	0.803547	1.59486	3.0289	1.08616	2.81995	2.6878	1.82703	1.8104	1.89589	1.65804	0.913578	1.75798	1.05999	2.84176	1.93486	1.65255	1.68565	1.65687	2.34024	1.94177
ACH-000645	JL1	JL1_PLEURA	2.77172	2.69373	3.21653	2.84581	2.14076	3.32076	3.73068	1.6053	2.88064	3.97312	2.37592	5.54205	1.0082	2.03492	2.60913	1.62671	2.2114	1.667	2.69323	3.51981	2.45906	1.83859	4.23231	1.87719	2.90487	2.45315	3.86673	3.02202	3.30136	3.9751	2.34974	2.45861	2.05875	3.06725	2.75329	2.09124	3.78489	2.83128	2.23305	3.20183	3.1192	1.97236	2.18445	1.95794	2.33659	3.90455	3.23439
ACH-000646	OVMANA	OVMANA_OVARY	2.50219	1.46175	2.01796	1.83984	1.99919	2.17371	1.50927	2.05709	2.67684	2.91114	2.35537	2.32522	2.46475	2.49444	3.49964	0.93628	1.30983	1.54446	1.4725	1.50155	4.71497	3.66238	1.81524	1.9658	2.79957	2.38402	3.13795	1.88611	1.91275	2.2512	2.22036	1.86073	2.8216	1.94839	1.42129	1.23859	2.95905	1.31789	2.4954	1.9794	5.0839	3.30518	2.62944	4.01655	2.47203	1.78026	3.0355
ACH-000656	SUDHL8	SUDHL8_HAEMATOPOIETIC_AND_LYMPHOID_TISSUE	0.121612	0.070301	0.0765821	0.0868577	0.166165	0.151043	0.152943	0.0415813	0.102025	0.0947291	0.152026	0.280518	0.147127	0.141161	0.0876579	0.137766	0.121741	0.078047	0.170029	0.138663	0.0850374	0.10515	0.173006	0.105977	0.109764	0.123423	0.213771	0.20559	0.089254	0.134143	0.265661	0.0620511	0.0798354	0.0395913	0.0726948	0.0636311	0.0772966	0.0673314	0.0697223	0.0927682	0.102944	0.128932	0.0930107	0.115717	0.180247	0.251956	0.0898356
ACH-000658	KMS18	KMS18_HAEMATOPOIETIC_AND_LYMPHOID_TISSUE	0.334522	0.111163	0.275263	0.330684	0.477366	0.455719	0.0976548	0.695649	0.32241	0.304445	0.508626	0.400832	0.0763333	0.495505	0.192648	0.384323	0.41788	0.346782	0.527669	0.53514	0.294921	0.933384	0.247868	0.341737	0.297309	0.337787	0.488971	0.441851	0.48513	0.234793	0.272689	0.131676	0.224529	0.189356	0.284881	0.376414	0.550357	0.411772	0.228997	0.151321	0.150676	0.310526	0.20181	0.410059	0.325785	0.220932	0.440645
ACH-000659	SCLC21H	SCLC21H_LUNG	0.667956	1.7116	0.455902	0.395935	1.26598	0.223501	1.30901	0.648131	1.00556	0.378045	0.529788	0.230889	0.744368	0.221389	1.09357	0.607655	0.128098	1.08948	0.256479	0.226444	0.356422	0.412045	0.264385	0.545931	0.606065	0.493704	0.336734	0.978995	0.465848	0.318564	0.438726	0.652344	1.04358	1.53093	0.525184	0.195997	0.41316	0.334955	0.505189	0.608987	0.132023	0.50891	1.28656	0.489287	0.384432	0.594426	0.27523
ACH-000661	WM1799	WM1799_SKIN	2.6262	4.42747	1.54474	4.24926	2.59771	1.74589	2.86212	3.33249	1.95175	2.71991	3.86762	5.91943	1.27478	2.37694	2.96184	1.47456	2.70173	1.13573	2.54688	4.28928	3.00402	3.62099	3.53802	2.49588	2.7456	2.49759	4.04751	2.32689	2.93429	1.00176	2.16751	4.45194	3.89608	1.64249	2.11112	1.84589	1.57686	2.28117	1.949	3.52093	4.15005	0.834792	1.6511	1.88926	1.56005	2.45734	3.8635
ACH-000664	SUDHL1	SUDHL1_HAEMATOPOIETIC_AND_LYMPHOID_TISSUE	0.0726063	0.0700759	0.0458638	0.0646795	0.116297	0.0309973	0.177308	0.039512	0.0662658	0.0791401	0.0554712	0.0191518	0.0867162	0.0462193	0.169093	0.0684952	0.115004	0.0651534	0.0464575	0.0525434	0.0711691	0.0402597	0.0771688	0.245737	0.0216042	0.0841561	0.0194123	0.248909	0.0234975	0.0611487	0.0468778	0.0455556	0.0826709	0.103046	0.0508523	0.0472325	0.0259216	0.115164	0.043251	0.068557	0.0365768	0.0271206	0.0826551	0.061082	0.0589217	0.0185493	0.041658
ACH-000671	HUH6	HUH6_LIVER	2.22252	1.85395	1.92318	1.65851	0.77623	2.81627	3.75038	1.48977	1.77672	2.08065	1.20046	3.46068	4.18142	3.6463	2.08721	0.758154	1.08237	0.728693	1.74043	8.17821	6.24468	2.94051	3.96033	1.68457	3.18725	2.8407	3.50313	1.56683	2.90352	2.07432	2.16953	0.581442	1.50981	2.93539	1.66112	1.03269	2.44686	1.05518	2.01478	2.43935	2.36801	3.73119	1.73222	2.01615	1.77959	1.83665	2.26927
ACH-000673	LN443	LN443_CENTRAL_NERVOUS_SYSTEM	2.76372	2.22204	3.06735	3.28193	2.52294	3.37999	1.43958	0.515587	1.5657	4.27626	1.3875	2.0394	2.97545	2.28604	2.88061	0.910018	3.69434	1.67328	2.33108	2.25013	1.79078	0.76374	3.59527	1.74658	4.75835	3.66691	3.701	1.67693	1.56138	4.34278	2.69345	2.19525	3.01634	2.67676	3.33462	6.92942	1.87866	2.43543	3.03899	2.41794	6.02413	1.80259	1.47371	1.65154	2.23329	6.96753	2.8897
ACH-000676	LN464	LN464_CENTRAL_NERVOUS_SYSTEM	1.87715	3.66589	1.31398	1.69932	2.846	2.10049	1.62519	1.41713	1.87053	1.68536	3.16186	3.10325	1.52888	1.14377	2.66496	1.29643	1.51763	1.45443	1.80677	1.57458	2.28113	1.30199	1.8462	1.87058	1.56601	2.64731	1.77791	2.10415	1.18811	1.91621	2.1749	0.897336	1.99948	2.16175	1.73218	3.56366	1.87086	1.37686	1.84369	1.80224	1.17535	1.1302	1.41006	1.24303	1.51806	3.11941	1.73124
ACH-000682	SNU1066	SNU1066_UPPER_AERODIGESTIVE_TRACT	3.49841	2.30654	4.50377	3.53174	1.72258	1.46678	4.56772	3.8472	2.7182	2.37465	3.88991	2.21971	7.31975	3.14544	2.17473	3.57905	3.75737	2.89818	3.72783	6.5425	2.35588	3.6534	2.77292	3.37631	5.71975	2.64085	3.78361	3.95035	4.35835	2.44061	2.75872	5.25028	3.69936	3.11767	3.37791	2.10752	3.65083	2.01528	2.74725	4.02411	1.85325	4.88765	1.32647	4.43313	7.44965	7.5623	4.11142
ACH-000683	SNU503	SNU503_LARGE_INTESTINE	1.46307	2.45159	1.21389	2.70262	2.05935	2.18582	1.3705	1.77038	1.43368	0.680543	1.66798	0.567281	0.841818	2.58572	1.13439	1.40521	1.72336	1.03135	1.31922	1.50957	1.03244	1.25679	1.14906	1.45189	1.16773	0.579299	1.08743	1.6283	0.999265	1.25383	1.69809	0.969781	1.16948	1.54178	1.23492	2.39821	0.999258	0.959971	0.761114	0.97058	0.280566	0.833229	1.13558	1.28932	0.926455	1.45751	2.22069
ACH-000685	L33	L33_PANCREAS	1.05343	0.449122	0.672718	1.3452	2.92454	0.768166	1.30523	1.05398	0.653372	0.599013	0.831168	0.306662	0.707392	0.830766	1.75422	1.01756	3.80927	1.15754	0.614457	1.28079	0.875045	0.864041	0.666762	0.955966	1.14236	1.10156	0.744279	0.88954	1.22273	0.439512	0.932432	0.69307	1.0555	1.21233	0.853897	0.918129	1.30597	1.09388	0.604986	0.729157	1.2694	2.04382	0.801522	0.868046	1.0283	1.109	1.42237
ACH-000686	SNU878	SNU878_LIVER	3.87139	3.24143	3.54986	3.30959	3.31432	4.10587	3.61764	3.81692	4.45483	3.15995	3.61161	4.3733	2.82774	2.59171	2.72914	5.03652	2.6714	2.48033	3.07137	3.64291	2.42801	4.28362	2.55924	4.21414	4.14279	2.61043	1.30124	6.14405	1.91445	3.17588	4.11171	2.87568	3.14796	2.40491	2.74599	2.55504	4.89441	3.53151	4.47313	3.70207	4.02201	3.8001	2.28341	2.76298	9.09284	4.94132	2.45864
ACH-000687	CI1	CI1_HAEMATOPOIETIC_AND_LYMPHOID_TISSUE	0.117359	0.109363	0.0541753	0.108788	0.112887	0.116225	0.117328	0.0852238	0.0781469	0.116923	0.107533	0.0724266	0.0897685	0.0666893	0.270885	0.0692952	0.112656	0.0716724	0.131007	0.139628	0.316485	0.0882159	0.107844	0.101622	0.147582	0.07502	0.130902	0.089194	0.0696238	0.09299	0.120098	0.118729	0.172607	0.0287401	0.115906	0.234165	0.0770929	0.121985	0.105894	0.0524306	0.096767	0.10114	0.055808	0.140918	0.177171	0.0907478	0.0974278
ACH-000690	HCC2814	HCC2814_LUNG	2.04302	2.30424	1.35593	1.85113	1.16782	2.19408	2.32199	1.11695	1.09272	2.03774	1.55056	1.18447	1.60703	1.95571	1.57797	3.64301	3.17329	1.1026	1.79083	3.03808	1.95816	1.46899	2.87035	2.13071	1.65683	1.86263	2.24811	1.73904	1.3094	1.98846	2.90998	2.23001	0.932679	2.33637	2.09662	3.20639	1.17151	0.887489	1.55255	1.53267	1.71601	2.85846	2.33146	1.52898	1.21404	1.85802	2.56857
ACH-000692	SNU899	SNU899_UPPER_AERODIGESTIVE_TRACT	1.37634	2.39451	1.60071	1.23948	1.07939	0.983944	1.65371	1.33521	0.624008	0.850046	1.44474	0.687162	1.2321	0.347848	1.04147	1.36324	0.913471	2.1116	0.9695	1.00844	1.924	1.42311	0.829291	1.96717	1.6234	1.32858	1.23517	1.37265	1.27464	0.502049	1.85127	1.24955	1.93684	2.91311	1.01987	0.555791	1.44621	0.707803	2.67304	1.62918	1.43725	1.1828	2.22087	1.26626	0.854437	1.35132	1.30475
ACH-000695	CORL47	CORL47_LUNG	1.00348	1.27479	1.53017	0.294825	1.06448	0.207894	1.36595	1.02201	0.765432	0.902711	0.856921	0.641517	0.809036	0.6377	1.08097	1.07024	1.39684	0.732765	0.832785	1.23925	0.876925	1.07848	1.26271	0.737883	1.25741	0.395066	1.68951	0.757195	1.70835	0.433396	0.659057	0.915557	0.72841	1.41979	1.40919	1.25462	0.474671	0.720968	0.73497	1.80057	0.898514	0.699969	1.24293	1.46463	1.96526	0.976103	0.405601
ACH-000700	NCIH2882	NCIH2882_LUNG	2.73351	1.20522	2.5263	2.43181	3.74612	4.52899	2.0118	2.62677	2.20337	2.22798	1.59373	2.58759	2.11627	1.96546	2.2543	3.61662	3.8526	5.93878	2.63179	2.00156	1.73232	2.65342	2.96751	1.43059	1.34322	2.00775	2.93439	1.40571	3.58083	2.55458	0.932754	1.74496	3.96335	2.85529	1.90612	1.80441	3.89619	1.57805	2.09181	3.59809	5.34902	5.173	1.32992	4.00093	2.38666	1.36931	3.4804
ACH-000701	RMUGS	RMUGS_OVARY	4.45074	1.80045	4.54617	4.99143	2.56119	5.60513	5.55036	2.50057	3.28976	4.71153	5.68231	5.43444	3.35213	4.74192	3.20233	6.02539	4.38215	4.50441	8.56673	3.53162	3.83419	1.83463	6.42742	4.97834	4.49176	3.5561	2.62794	7.23643	3.60044	12	6.393	1.83682	3.5082	6.61931	4.08276	2.90558	5.43363	6.70981	1.78062	7.80562	7.26251	5.00108	1.36753	6.03994	9.74978	3.51687	2.23319
ACH-000705	LC1F	LC1F_LUNG	1.3481	1.98986	0.995951	1.37943	2.5849	2.28719	1.6044	2.06007	1.20385	0.714715	0.975146	1.03527	0.705718	0.754438	1.03504	1.38566	2.91566	1.22314	1.45429	1.57473	0.976859	0.761708	1.54487	1.20802	0.859186	0.685754	0.657007	1.40944	1.20447	2.35184	1.64779	0.441991	0.887914	1.76561	1.23571	2.30821	0.85209	1.49473	0.497768	1.65444	0.621513	1.2727	2.79888	1.11351	1.57223	0.611485	1.49154
ACH-000707	P3HR1	P3HR1_HAEMATOPOIETIC_AND_LYMPHOID_TISSUE	0.103141	0.163059	0.0379315	0.0937946	0.0830337	0.0939748	0.0752117	0.0943728	0.0482269	0.108335	0.116588	0.0763319	0.132958	0.0701708	0.125394	0.087384	0.0788282	0.100109	0.153238	0.0677423	0.0548215	0.129853	0.0664997	0.144655	0.127006	0.0790021	0.133155	0.106852	0.11741	0.0977581	0.0540541	0.103787	0.092793	0.0115099	0.138756	0.160153	0.0492139	0.121384	0.175673	0.116793	0.218456	0.116566	0.11161	0.164207	0.183825	0.0515252	0.0751451
ACH-000708	SNU283	SNU283_LARGE_INTESTINE	2.74739	2.73647	4.24045	1.82945	1.17128	4.06997	2.38892	1.77875	2.49399	2.78505	2.88648	3.00904	1.99803	2.83872	1.39525	1.14648	3.21058	3.20405	4.77709	2.47461	0.928252	2.80148	1.67531	2.95856	3.26185	2.98453	3.55275	2.23533	2.20337	6.76708	3.61818	1.54008	2.65508	3.38218	2.61336	1.616	3.42898	5.66554	1.85851	1.53156	2.10413	2.28892	1.25904	1.93387	2.08518	3.35469	1.50021
ACH-000709	KMRC2	KMRC2_KIDNEY	1.80369	1.01884	1.55463	1.85537	1.33636	2.3793	1.15553	1.29759	1.37844	2.04356	1.37246	1.52716	2.57271	1.25368	2.69947	2.40156	1.10274	1.42296	1.40515	1.93144	1.58574	1.52271	1.4396	3.56736	1.93413	2.20022	1.30046	1.43365	1.39913	1.45907	1.17888	2.23176	1.67301	1.73096	2.03955	0.47293	3.21392	1.46618	2.47512	0.924818	1.45023	5.26796	1.43793	2.21595	4.13579	0.594946	1.06825
ACH-000710	NCIH854	NCIH854_LUNG	2.23683	1.6547	0.951838	0.531593	1.90497	4.72414	1.32136	0.907475	1.35826	3.59944	1.34055	5.33221	2.20314	0.44812	1.16806	1.57933	0.869844	1.19478	1.63642	1.78794	1.92629	0.924745	2.69256	1.9145	2.68492	2.98197	5.21942	4.42316	1.454	1.13845	2.19021	0.679804	1.32038	1.80949	2.28617	4.36441	7.93368	2.10432	3.86248	1.08251	2.72842	1.6596	2.59065	3.16045	0.903658	4.69732	0.938113
ACH-000712	HCC1833	HCC1833_LUNG	2.39785	4.62696	1.66799	2.42121	2.74173	3.81221	3.32938	1.35247	2.54852	3.44874	2.08072	5.56473	1.53748	1.68931	3.59629	1.52948	1.66039	2.4765	2.44757	1.75675	1.00379	1.87524	3.99265	1.1999	2.3101	1.57311	1.99713	3.55839	2.10545	2.05741	3.84878	2.28289	1.69347	2.10454	2.13188	2.5932	2.8451	8.00715	2.23916	4.28119	1.7792	1.28322	1.2218	1.82719	1.52607	2.4662	2.02079
ACH-000713	CAOV3	CAOV3_OVARY	3.02026	3.12287	2.35502	4.05502	3.64963	3.50095	5.24996	2.29214	2.02918	2.54122	2.13899	3.0972	2.15954	1.79926	2.95874	1.6284	3.82897	1.05165	4.05254	3.02518	1.66524	2.07958	3.18205	2.24104	2.45172	3.80379	2.53644	4.88404	3.00815	2.3745	1.50906	2.41782	3.37481	3.33081	3.14561	5.61626	4.51678	4.13643	1.47879	4.47589	2.01976	1.69794	2.35933	1.46444	2.80195	4.68547	2.50343
ACH-000715	SNU1214	SNU1214_UPPER_AERODIGESTIVE_TRACT	1.7815	2.67035	1.22646	2.07713	2.05369	0.877621	0.943295	1.14112	1.05041	1.23719	3.88073	1.11632	1.16142	1.41894	1.47774	1.25289	1.50982	1.8297	1.4159	3.00948	1.34213	2.25704	0.896338	1.15756	2.22315	1.04255	2.71254	1.47606	1.27433	1.8707	1.66161	2.25333	1.07637	1.75034	1.28641	1.76642	1.39902	0.898851	1.34629	1.78269	0.659617	2.17441	0.742861	3.5973	2.32292	1.82776	2.35467
ACH-000721	HMC18	HMC18_BREAST	1.0387	1.40309	1.07453	1.4612	1.46169	0.882161	1.20123	1.19038	0.866341	1.18948	0.580448	0.724017	1.51389	0.30582	1.15245	1.72157	1.6492	1.38161	1.57676	0.830725	0.9287	0.847443	0.925939	1.7414	0.798265	1.26889	1.696	1.82514	0.412399	0.759909	0.599238	0.821025	0.565736	1.08368	1.44724	0.32472	0.924399	1.24129	0.631977	1.63361	0.774464	1.21341	1.15712	1.4551	2.21373	0.628464	0.684963
ACH-000723	YD10B	YD10B_UPPER_AERODIGESTIVE_TRACT	0.838082	0.820965	0.295756	1.05894	0.433268	0.518416	0.39871	0.566175	0.379025	0.620696	0.900808	0.300987	0.708898	0.82542	0.592685	1.05461	1.0509	0.388447	0.41987	0.735521	0.433217	0.465781	0.382753	1.23718	1.62123	0.556736	2.02026	0.523073	0.548011	0.53023	0.883712	0.634848	0.392668	1.08298	1.00601	0.8241	0.457733	0.635379	0.763927	0.705545	0.476825	1.48223	1.1775	0.996689	1.2899	1.35024	0.688994
ACH-000726	TE14	TE14_OESOPHAGUS	1.48696	1.03294	1.05174	1.56933	1.64958	1.36236	1.26005	1.24738	1.30886	1.06928	1.58989	1.01766	0.837295	1.22232	1.30062	3.89771	2.00989	1.7281	1.35201	1.0975	1.31749	1.97136	1.05264	1.78679	1.35975	1.30249	0.92779	1.35928	1.23823	0.365745	1.53303	1.03034	1.06231	1.21039	0.933892	1.76689	1.38728	1.68915	1.19876	1.73825	1.10145	2.43155	0.781388	2.0413	1.85601	0.784093	1.08787
ACH-000728	KASUMI2	KASUMI2_HAEMATOPOIETIC_AND_LYMPHOID_TISSUE	0.106493	0.132401	0.126364	0.210476	0.0334834	0.0924937	0.141673	0.0442885	0.0718812	0.120161	0.0791204	0.0395839	0.0995286	0.0225758	0.0915856	0.0584373	0.107908	0.111318	0.100695	0.0992524	0.0600954	0.140687	0.0538803	0.127636	0.118824	0.0310859	0.0848847	0.2017	0.148744	0.26342	0.12089	0.185028	0.154447	0.078964	0.264466	0.0138325	0.0499629	0.166255	0.106827	0.108821	0.135466	0.0436746	0.150146	0.0865301	0.0762654	0.0689584	0.234509
ACH-000731	HCC2279	HCC2279_LUNG	4.2754	2.95145	4.04204	2.56922	6.53185	4.71365	6.43947	2.45966	3.72928	4.91591	5.86285	7.30876	5.09357	3.2982	7.88028	2.96857	3.57626	2.84865	3.94863	5.17155	2.54232	3.69663	3.37616	2.5177	6.20804	3.51732	2.61603	4.72999	3.30999	1.74279	3.45574	3.60284	3.12564	2.39157	3.6745	2.77853	4.48685	3.5046	3.19153	5.27459	4.12903	5.37485	2.36936	5.19881	9.00742	5.0349	4.64752
ACH-000732	PECAPJ41CLONED2	PECAPJ41CLONED2_UPPER_AERODIGESTIVE_TRACT	1.97252	1.84306	2.20731	1.65553	1.39194	1.96511	2.05904	1.47267	1.5214	2.04554	2.06335	1.24716	1.25518	1.45107	0.760896	1.46518	1.0862	1.78163	2.3182	2.0637	2.84848	1.65858	1.47856	2.87716	1.8979	2.31221	2.5537	2.9936	1.51182	2.34974	2.2156	1.54379	1.56298	4.33319	1.32081	1.46892	2.27654	1.98077	2.10223	2.0948	0.553209	1.0996	2.11352	1.45884	1.61738	1.42181	2.05053
ACH-000734	JHH5	JHH5_LIVER	2.08479	1.70094	1.13979	2.10358	2.11787	2.32086	3.73144	1.64439	1.76259	2.18339	1.18354	2.67405	4.93182	1.82116	3.07051	2.12142	1.07439	2.27908	1.47773	1.48769	2.75308	0.840862	3.6519	1.5909	2.18896	1.79055	0.610958	2.37316	1.53459	1.74546	2.74462	2.33569	2.86549	1.44471	2.04378	0.952263	2.64112	2.87676	3.29749	1.99391	5.39686	3.78974	0.829601	1.53487	2.41165	1.52027	1.3767
ACH-000735	PECAPJ49	PECAPJ49_UPPER_AERODIGESTIVE_TRACT	1.89959	1.31526	1.57965	0.851727	2.35815	1.75181	2.85486	1.42732	1.49319	1.63601	2.50693	1.69984	3.31484	1.44837	2.11965	1.54914	1.85547	1.90736	1.16457	2.77127	1.46891	1.42434	1.98631	1.64577	1.16962	1.81618	0.432001	1.93118	1.16937	1.09071	1.88908	3.59609	1.58565	3.18059	0.991618	1.68414	1.9894	1.4238	2.45806	1.55792	1.1005	0.905236	1.35855	1.6159	1.30621	1.13599	2.22405
ACH-000736	SNU601	SNU601_STOMACH	4.20045	3.62235	4.64902	3.89288	2.17533	3.20868	4.51472	3.43868	2.32714	4.76782	4.10143	5.50763	5.98137	2.27629	2.52185	0.667322	3.36336	2.70543	2.60945	5.82922	4.42451	4.53147	4.70978	2.1486	5.22236	5.08955	7.95226	3.72331	3.12012	2.85517	4.68378	2.22872	6.98286	2.39222	5.06843	3.75642	3.21564	1.29452	11.1099	4.04035	5.38478	9.86671	4.47609	7.91357	2.17032	6.4876	4.19875
ACH-000737	NCIH1385	NCIH1385_LUNG	2.51051	2.80223	2.94074	3.09615	1.70877	0.870906	1.36039	2.74539	3.01173	1.55821	4.47692	3.00094	1.38987	4.7894	2.15524	2.43723	1.70274	2.23379	2.52094	1.24215	0.762435	3.57096	2.993	1.59115	2.92072	1.16175	1.41089	1.0554	5.77228	2.33452	2.38227	2.78052	2.75189	1.75503	1.77455	0.748859	1.00963	5.66119	4.52715	1.59787	3.0369	1.76237	1.39984	2.14244	1.36864	1.65549	2.71012
ACH-000739	HEPG2	HEPG2_LIVER	2.11085	1.75149	1.30155	1.70282	1.53092	3.51762	1.94679	1.8286	3.00178	2.27808	2.15024	5.81175	2.42945	4.75391	1.67469	1.76387	1.07282	1.28063	1.98135	6.23583	3.5797	2.45841	6.01172	2.4969	1.77937	2.35084	0.621687	2.94025	2.89018	2.71984	4.87693	2.19945	0.624228	2.79378	1.77439	1.40781	5.90273	2.24347	1.68192	1.46411	2.72846	2.7914	1.66071	1.33882	0.890299	0.877673	2.75981
ACH-000741	UBLC1	UBLC1_URINARY_TRACT	2.49081	2.2936	1.98314	3.33898	2.96119	1.89781	1.66066	2.01342	1.22513	2.62004	1.65503	3.05914	3.36536	1.28514	1.96238	2.45678	2.99763	2.91781	0.85762	2.13984	2.88069	2.21575	2.5626	3.31468	1.69109	4.20778	1.42052	1.72608	2.18604	1.57889	1.44817	1.32405	3.55373	2.94096	1.38727	1.89748	3.3086	1.4261	2.12664	2.83827	1.61341	3.0924	4.88013	2.47125	2.36947	2.30529	1.79884
ACH-000742	DM3	DM3_FIBROBLAST	6.56459	2.78497	10.6055	7.57317	8.14939	5.59603	3.70543	2.30879	4.66304	4.6882	7.55334	5.15348	4.70911	6.86249	6.67405	2.00764	8.89786	3.66915	3.90532	7.97301	9.30712	3.04653	6.83867	1.94183	8.78816	5.59158	9.3963	4.33187	5.32778	5.55215	8.4961	5.36904	9.77146	4.91831	2.7799	4.88196	7.40766	8.4116	3.79148	3.56778	7.07202	2.1857	3.76561	7.42977	6.98987	15.6004	11.6671
ACH-000746	GSS	GSS_STOMACH	1.07798	1.16388	1.21745	1.76616	0.941747	1.14941	0.725086	0.984623	0.993506	0.617813	0.810394	1.2892	3.1473	1.15358	1.61204	1.63947	0.391271	1.38621	1.12662	0.773086	1.52703	0.616024	1.44061	0.869362	0.461245	1.06428	0.664044	1.59358	1.32064	0.882425	2.24329	1.55157	0.436925	0.802287	1.28782	0.752471	0.898961	0.8536	0.693619	0.863808	1.86268	0.709961	2.81064	0.820113	0.692168	1.05076	0.585055
ACH-000753	JMSU1	JMSU1_URINARY_TRACT	1.2318	1.42642	1.0692	0.814022	1.27289	0.836687	1.34017	0.948268	1.36541	1.17178	1.42741	1.48248	1.93786	0.857094	1.32001	1.33176	1.27312	0.453397	0.984535	0.869152	0.975144	1.00498	1.13755	0.939968	0.822151	1.35057	1.0459	1.74002	0.964237	0.986838	0.819654	1.26489	0.985501	1.73116	0.907134	1.04015	1.38831	0.699235	2.32975	1.18254	1.278	1.21821	1.57293	1.50845	1.00022	0.529148	0.926711
ACH-000758	MKN74	MKN74_STOMACH	3.39786	4.58825	4.39227	2.09734	6.31583	2.24896	4.34714	3.00544	2.22407	3.3885	2.79993	3.70552	11.0374	2.31552	3.86305	3.07163	2.60755	9.6966	3.02942	3.70569	4.03135	3.12429	3.22857	3.71075	1.95823	2.91763	0.50698	8.55471	2.73826	3.38897	4.45019	4.04524	2.6128	6.11	2.08585	2.33336	2.23454	1.26843	2.93254	4.45167	1.3834	1.72401	3.30876	6.55715	2.69316	2.4567	1.34483
ACH-000760	LNZ308	LNZ308_CENTRAL_NERVOUS_SYSTEM	2.4744	1.68454	2.65743	3.9569	1.8882	3.65639	1.54784	2.32173	1.19072	2.39089	2.85222	3.47872	5.56188	2.77288	1.25435	3.92167	2.26277	2.55715	1.95621	5.73827	1.10483	2.22078	2.5325	3.62351	1.46769	3.62364	3.46481	1.79026	1.62842	1.34954	1.65104	5.72016	1.66753	0.7543	3.17445	5.16613	1.69269	1.88502	2.34659	1.59476	2.19049	3.18651	4.1004	2.44462	2.49901	3.6498	1.95057
ACH-000761	NUGC2	NUGC2_STOMACH	2.60048	5.08844	1.46648	1.03289	1.43263	1.35101	4.12016	1.94576	2.27611	1.62558	3.4914	1.99774	1.37393	1.51212	1.61849	3.47863	1.8905	1.73926	2.02854	4.36006	1.92939	2.06888	2.43981	1.47394	3.20519	2.1717	2.27111	6.20005	3.41247	1.17115	3.53626	1.83074	1.45316	4.88552	1.51239	2.34826	5.0556	1.76629	1.89673	4.1191	2.36377	2.2802	2.93939	4.13852	2.89335	4.0141	2.68537
ACH-000762	YD38	YD38_UPPER_AERODIGESTIVE_TRACT	1.0056	0.420593	0.714186	0.519451	1.52749	1.67476	0.938712	1.03203	0.719853	0.973507	0.760979	0.615828	1.28135	0.954036	0.947893	1.88361	1.31767	1.07328	2.00144	0.714676	0.736124	0.313238	0.990815	2.38559	1.30717	1.50459	0.980324	1.45741	1.26713	1.02215	1.08056	0.847502	0.582338	2.17222	0.913996	0.746545	1.28564	0.877125	0.648759	1.25136	0.378416	0.578228	1.74192	0.620009	1.07789	1.37155	0.780855
ACH-000764	SH10TC	SH10TC_STOMACH	2.0547	1.30829	1.75631	1.30848	3.34523	1.79402	0.79415	1.6514	1.96473	1.73989	2.61467	1.96913	0.774603	2.63895	1.32267	1.40767	3.71607	2.06101	0.804286	2.89091	6.81046	2.2995	1.8667	1.49155	3.59951	1.41754	1.58469	1.28182	1.89625	7.50529	3.15156	1.16715	2.00522	3.09367	1.34163	2.20916	0.593259	3.20982	1.08198	1.12294	5.37608	2.71751	1.02401	0.839117	2.79535	4.56377	1.05276
ACH-000765	WM983B	WM983B_SKIN	2.57032	3.90742	1.64179	2.55289	1.31815	2.29655	1.85247	3.96422	1.5024	2.42682	3.71849	1.47605	1.56641	1.86324	2.7005	2.02964	2.51416	1.6859	2.0597	1.41758	4.87423	1.7332	2.3129	1.84341	3.28016	1.89795	2.93453	2.26611	1.88911	1.13475	1.77572	2.15146	6.34721	3.36336	3.21152	2.03737	2.7945	3.88105	3.08967	2.83899	4.15516	2.22357	1.01541	2.87244	1.88072	4.32587	3.02763
ACH-000771	BICR56	BICR56_UPPER_AERODIGESTIVE_TRACT	2.11425	1.83667	2.09468	1.33266	1.16567	2.28094	2.01367	1.60991	2.3896	1.53093	1.96761	1.59826	2.94044	2.62681	2.65825	2.39421	1.44073	1.61566	3.32701	1.17889	1.63917	2.47112	1.94408	2.40292	1.65866	1.87337	1.90386	1.64227	1.80288	2.4509	2.43343	2.13376	1.80447	1.86235	1.35965	1.72434	1.62657	2.16193	1.69617	1.59627	0.780289	1.10584	2.40481	1.17375	1.48365	1.07615	3.7032
ACH-000772	TE441T	TE441T_SOFT_TISSUE	1.25784	0.813168	1.47693	1.31537	2.13047	0.223456	1.2347	1.34264	1.90724	0.930759	0.824996	1.27693	0.685394	1.42183	2.06053	0.79768	2.2426	1.65091	1.60435	0.927005	1.49365	1.22301	0.572858	1.16312	1.43758	1.62436	0.810636	1.94529	0.808255	2.23813	0.79034	0.652502	1.43034	2.12717	0.434679	1.14231	1.74321	2.34903	0.765096	1.88519	0.609812	0.797786	0.517559	0.926209	2.04798	0.634036	1.53353
ACH-000773	KIJK	KIJK_HAEMATOPOIETIC_AND_LYMPHOID_TISSUE	0.0542363	0.0367891	0.0466154	0.0332916	0.0308867	0.0321839	0.0889484	0.0545691	0.0793636	0.0467405	0.0282544	0.0283773	0.108221	0.0349999	0.128885	0.0799298	0.0631072	0.0312488	0.0189039	0.0739594	0.0576924	0.0615447	0.0468065	0.158461	0.0465709	0.0344938	0.0368037	0.108933	0.042465	0.122672	0.0597112	0.0579808	0.0692194	0.0864885	0.0180412	0.0247698	0.0233975	0.135786	0.0307343	0.025317	0.0256304	0.00989738	0.0422046	0.0131753	0.0550575	0.0168971	0.0310856
ACH-000774	RERFLCAD2	RERFLCAD2_LUNG	2.68694	3.69762	2.19966	2.3083	1.98907	1.82609	3.75224	3.34777	2.00886	2.84281	3.71037	1.76248	3.24893	1.43111	1.0948	2.68689	2.62544	1.41388	2.27734	1.77837	2.90027	3.59103	2.40628	2.36359	3.12277	2.41826	2.62439	2.13007	3.7214	2.28885	1.63066	1.95256	3.96312	3.61428	2.35814	1.67367	4.20451	2.8304	2.49806	4.27771	2.9092	3.93012	3.01042	3.70586	4.62101	1.68674	2.34662
ACH-000777	KYSE30	KYSE30_OESOPHAGUS	3.81519	2.61165	2.70294	4.59848	6.21265	5.31951	2.85736	3.10202	6.04884	4.29191	3.93281	5.21817	3.68865	2.33108	5.87648	3.06351	2.41744	7.36361	6.27824	3.08035	2.15897	1.836	2.90006	2.93718	3.81277	5.97322	3.75903	9.86716	2.2872	4.45453	4.89467	4.35714	4.79488	5.42631	3.534	3.24206	3.63757	2.08383	3.34623	4.50701	3.75851	1.82739	1.08334	3.76858	1.2385	7.88851	3.90712
ACH-000779	PC9	PC9_LUNG	1.60339	0.989024	1.50103	0.911326	1.48586	1.68159	1.75594	1.70275	0.729722	2.2854	1.24954	1.51624	3.06373	0.964841	1.58899	1.23199	1.02171	1.07468	1.45673	2.48935	3.47399	1.15834	1.50596	2.55701	1.96675	2.07375	2.13441	1.66155	1.52943	1.12975	1.31353	1.59581	1.37435	0.838705	1.0949	1.73767	2.38261	1.09165	1.59719	2.17993	2.12711	2.99585	1.44849	0.92378	1.45099	1.33258	0.797748
ACH-000782	SEM	SEM_HAEMATOPOIETIC_AND_LYMPHOID_TISSUE	0.165157	0.11311	0.0872629	0.424726	0.0880927	0.124102	0.109826	0.189456	0.152519	0.1332	0.194598	0.503467	0.0834192	0.304866	0.094017	0.187834	0.239925	0.303055	0.238963	0.136711	0.178034	0.347788	0.208138	0.114569	0.169894	0.066221	0.155376	0.189804	0.281315	0.17228	0.118085	0.26472	0.104363	0.055062	0.254011	0.215079	0.0707667	0.265181	0.111151	0.246343	0.118191	0.0794283	0.187072	0.110467	0.250631	0.147704	0.186391
ACH-000785	NCIH2126	NCIH2126_LUNG	2.04843	0.650278	3.04682	4.42263	2.16352	2.43713	4.13537	1.65711	0.853122	1.37802	4.01256	1.45106	2.76226	1.13468	2.24083	3.81606	1.83875	1.19836	1.36116	1.50587	4.48863	1.43563	4.09103	2.3767	1.91901	1.78669	3.53393	2.58824	1.93056	1.59471	2.65021	2.48221	1.0004	1.86675	3.62019	1.15634	1.43115	1.96712	0.938937	1.98747	0.644232	0.853157	1.68023	2.30234	0.68301	6.60778	1.26132
ACH-000791	RERFLCAD1	RERFLCAD1_LUNG	5.70412	5.09305	3.68128	3.2464	5.91372	5.61884	6.21543	5.20336	4.36669	11.5245	3.32827	3.19253	3.79625	3.93378	3.22199	9.76746	4.09051	7.33008	4.5884	5.44316	3.60856	3.2572	7.02275	7.41022	5.8656	14.2043	4.62629	5.28943	12.2642	1.84874	2.86541	3.11904	6.2792	3.91001	6.81397	3.85527	10.3567	4.08685	8.10674	7.58912	6.97504	6.87427	6.72311	9.15148	5.45365	10.2204	7.2123
ACH-000796	MCAS	MCAS_OVARY	4.05208	1.91429	5.08521	3.21698	2.22602	3.44791	3.91869	3.61002	4.52728	2.98179	2.89931	2.6322	5.22379	4.4904	3.7603	2.83909	4.64087	8.91807	6.48411	2.1167	2.44189	1.87815	3.66773	4.36872	3.21774	4.02877	3.61903	3.34349	6.67871	3.78742	3.37389	4.99455	6.48258	4.00965	4.44962	1.90023	2.41416	4.32728	5.13313	4.85597	4.00764	1.97088	2.77774	2.21015	1.94711	2.95979	4.62097
ACH-000797	HLFA	HLFA_FIBROBLAST	5.25056	4.83334	6.10205	5.78505	5.51901	3.51318	4.38976	2.80643	5.65449	6.73135	6.59583	4.83886	6.34346	8.83097	4.86505	2.08329	5.23292	2.7379	5.44501	6.03129	5.2298	5.29797	4.7356	1.94585	7.82286	4.65948	7.25702	4.64839	4.52108	7.2198	7.64388	3.67605	4.66642	4.65391	5.44865	3.86429	5.22411	7.35252	2.25359	3.56446	8.30412	2.80311	3.12721	4.69185	6.72515	11.5398	8.21534
ACH-000799	HS695T	HS695T_SKIN	3.19925	1.39939	2.00863	3.24063	3.3055	2.88075	1.68567	3.14916	3.95019	3.53824	2.81972	4.71061	4.19444	4.06108	2.13888	2.43583	1.80459	1.50468	2.51266	3.38941	2.26367	1.97908	3.88178	3.04852	2.61548	4.60565	2.18127	4.07399	2.92162	4.34959	1.37872	1.73802	5.76788	2.68291	3.46692	2.06214	5.02437	3.05687	4.95278	2.10372	4.17176	2.02709	4.12169	3.44941	3.85108	2.08382	3.59887
ACH-000801	HS936T	HS936T_SKIN	2.01687	2.3432	0.976074	1.81985	4.3139	3.90294	0.98806	1.02105	1.71645	1.50971	4.89964	2.54952	1.16629	1.29821	3.22181	2.13984	2.94447	1.73682	1.63185	1.09186	1.06498	0.985594	1.19081	1.73453	1.54799	1.90887	0.757787	3.48879	0.84126	2.31299	2.08425	1.3019	1.56382	4.32178	1.38843	1.36794	3.29901	2.32362	2.30125	1.99879	0.954219	0.694938	0.729596	0.832903	2.84922	1.46734	1.44026
ACH-000807	SNU738	SNU738_CENTRAL_NERVOUS_SYSTEM	3.20703	2.92307	2.76947	1.45564	2.46757	3.66761	5.42732	1.18642	3.23319	3.75736	3.90908	3.83615	2.12146	2.86923	6.74378	3.04195	4.52542	2.98977	3.59538	2.14842	2.79664	4.22703	5.2607	2.1888	3.79746	1.73128	1.82092	4.35405	4.92112	5.68302	4.01603	3.23765	5.2327	2.71114	1.95159	0.442327	3.23211	4.77982	2.08129	3.10706	2.55363	2.26126	3.73193	2.64225	5.95085	2.74184	2.50892
ACH-000808	HUH28	HUH28_BILIARY_TRACT	4.87962	2.29511	7.71087	7.93052	4.93834	3.03354	5.82442	5.74155	2.19232	4.18523	3.31825	3.91404	8.00699	5.30283	9.46827	4.38822	6.7792	3.45513	2.99254	9.20523	3.1037	5.36413	5.07866	4.45793	6.20896	3.89206	3.57221	5.0582	9.09623	3.7324	3.38068	8.25722	4.29823	3.57247	5.60139	3.28604	3.85301	8.8948	2.83123	4.21037	6.19216	5.0986	2.34858	3.43101	4.53393	5.19532	2.73535
ACH-000813	T3M10	T3M10_LUNG	2.86651	4.91169	2.11314	1.70878	3.14607	1.94049	2.86317	1.99363	2.25034	2.65258	6.1672	2.68649	1.05971	1.6131	2.65077	2.36778	2.98314	3.14359	2.99665	2.60575	2.40336	1.51862	2.69747	2.33445	2.67806	2.01526	3.02069	4.40851	4.09599	1.82035	2.24398	3.11488	2.33718	5.49691	2.77335	2.16174	3.73459	2.65954	1.28085	7.10555	1.68218	2.27557	2.2311	3.68229	3.00398	1.85393	1.3042
ACH-000820	SW403	SW403_LARGE_INTESTINE	3.08489	2.74223	2.84668	5.14833	1.28463	3.15508	4.61945	1.82145	2.4104	3.48447	4.72288	3.37922	4.57301	2.62647	4.10744	1.10799	2.29999	2.46488	2.4689	8.72351	0.721847	1.9077	2.53396	1.68881	2.6753	2.48863	6.37559	1.64915	2.85423	2.11236	2.50535	3.63852	2.71844	3.16943	3.01898	2.08953	3.02669	3.11677	1.52536	2.57139	1.96676	3.07021	1.10575	1.35593	1.92126	5.01392	2.11278
ACH-000829	HUNS1	HUNS1_HAEMATOPOIETIC_AND_LYMPHOID_TISSUE	0.122453	0.0763625	0.108478	0.179941	0.100379	0.0849216	0.173876	0.126967	0.0786906	0.15956	0.148798	0.0882044	0.324258	0.155883	0.194774	0.141475	0.0650659	0.138576	0.0677352	0.103576	0.227301	0.0853557	0.152988	0.136602	0.125543	0.104347	0.136429	0.130812	0.180707	0.09185	0.124567	0.124222	0.0623176	0.0375274	0.186603	0.0364892	0.0779703	0.128343	0.0816738	0.108064	0.418359	0.130823	0.187279	0.133772	0.07324	0.105847	0.119338
ACH-000831	HEC50B	HEC50B_ENDOMETRIUM	1.20111	1.73372	0.9767	1.23696	0.920322	1.02904	0.358589	1.03299	0.862188	0.897286	2.61156	1.25936	1.15059	1.14446	0.44132	1.59125	0.646468	2.53927	0.512061	1.3671	2.76236	1.67387	0.783851	1.75888	0.882585	1.11567	1.64595	1.27963	1.16402	1.01927	0.707033	0.886974	0.785718	2.1745	1.32732	1.12805	1.55286	1.79028	0.754669	0.690559	1.00274	0.296627	1.68518	1.69729	0.684891	0.763909	1.25271
ACH-000833	RH30	RH30_SOFT_TISSUE	1.48159	0.396958	0.991716	0.491911	1.3102	2.33589	2.14706	0.812385	1.25027	1.8133	0.256829	5.10658	2.1042	1.90921	0.332073	2.4564	0.609928	0.843769	1.84882	1.36671	0.802652	0.755042	3.15771	3.05166	1.37287	2.79864	1.16546	2.8846	2.09257	1.03258	1.75798	1.19601	0.779932	0.691643	1.24628	0.935868	2.28492	1.0965	1.35664	1.88603	2.78761	1.88709	1.08842	1.27676	2.77423	2.64496	2.34807
ACH-000834	UMUC1	UMUC1_URINARY_TRACT	1.73753	1.05818	1.29204	1.50497	1.04185	1.34767	1.53384	1.38644	1.2005	1.29655	1.68284	1.38516	0.984832	1.01441	1.08665	3.3494	1.08444	1.75378	1.12471	0.905293	1.7302	0.784332	1.46739	2.47286	1.57743	1.43955	1.42129	2.99098	1.3994	1.63943	3.18739	1.24609	2.63708	3.47786	1.0694	0.968224	1.42846	2.33004	2.5858	2.11886	0.763205	2.15135	1.80819	1.79372	3.26424	3.55547	1.87568
ACH-000836	YD15	YD15_SALIVARY_GLAND	1.35072	1.22201	0.880932	1.0922	1.94645	0.958659	0.710017	1.72793	0.769098	0.875707	1.32981	0.945428	1.42899	2.22249	1.39887	1.7181	2.19643	1.37653	1.43536	2.23377	1.6806	1.48345	1.05755	1.16189	1.07177	0.96027	1.36417	0.736574	1.65484	1.02721	1.01883	2.43599	0.709943	0.906276	0.976071	1.18359	1.47168	0.949591	1.14772	1.09553	1.58246	1.46941	2.84214	0.959846	0.870614	0.884296	1.39515
ACH-000837	NCIH322	NCIH322_LUNG	1.75761	1.42798	2.03883	1.76062	1.00153	1.48698	2.46642	0.984106	1.34356	1.81422	1.46403	1.02462	1.48851	1.2606	1.25015	1.80349	1.3002	2.65213	1.04437	1.50731	2.69286	1.34714	1.31007	1.61589	2.54151	1.24179	2.68408	1.52725	1.40698	2.68271	0.998571	2.45768	0.947606	2.07966	1.18787	2.20738	1.89349	1.20112	1.08541	2.80773	1.2999	1.46195	2.09306	2.61276	3.49638	4.59844	2.47271
ACH-000839	SCABER	SCABER_URINARY_TRACT	1.18864	1.40186	1.30751	0.816824	1.14433	1.36974	1.20987	1.2384	0.919896	1.0903	0.396052	0.437434	0.740376	0.699729	1.03444	1.73425	1.32886	0.954615	0.391571	1.15271	2.46251	0.916488	0.795575	1.66733	0.970412	0.968074	1.06476	0.920683	0.903433	1.32378	0.725099	0.848047	1.27573	1.78035	0.742478	1.51104	1.53786	1.17427	1.06469	0.873293	0.865795	1.18843	1.73176	0.963435	1.69319	0.523565	1.13214
ACH-000842	SW480	SW480_LARGE_INTESTINE	3.25697	3.18497	2.53712	4.21286	2.82094	2.22861	1.67998	4.07747	4.30832	4.44245	4.46622	4.40828	2.74756	3.46658	4.74188	1.68251	2.53029	2.23406	1.36998	5.83469	2.41602	2.83776	2.18462	4.41538	3.42526	3.43417	2.62765	4.32979	3.4087	7.23457	4.3015	2.61729	2.56849	2.64249	2.92586	3.79836	2.17977	3.35124	2.71204	1.58666	2.22237	2.80167	2.18198	3.52794	3.29614	3.18375	4.55266
ACH-000844	DMS454	DMS454_LUNG	3.77051	4.14833	3.79849	1.46829	2.35342	5.73071	2.24685	3.59025	4.69647	3.40244	2.60369	10.9188	2.58521	3.54756	1.45931	1.83448	4.08682	7.6438	1.3355	4.50836	0.83581	5.12438	5.96928	1.90037	2.63776	4.02397	3.22425	2.28185	4.8209	2.45077	4.02758	3.0233	3.01348	2.09459	3.25649	2.39911	3.01759	4.60935	4.49072	5.95433	2.51634	5.90962	1.89975	1.51798	1.2979	2.34334	2.47635
ACH-000845	NCIH1373	NCIH1373_LUNG	1.49186	2.16154	1.1883	1.51316	1.70111	1.26531	1.13395	1.50811	0.983718	1.63533	0.441373	1.4178	1.79192	1.15455	1.42044	2.7784	1.17755	1.70848	1.19256	0.751925	2.94929	0.631716	1.74672	1.23775	2.16513	1.35038	2.51186	0.725887	1.72523	1.20422	1.03138	2.2915	1.24866	1.75624	2.07948	0.537444	0.97783	1.56525	2.35342	1.19373	2.29827	1.15837	1.90556	2.03455	1.33226	3.96905	1.60121
ACH-000850	HS698T	HS698T_FIBROBLAST	4.5068	6.23629	4.52158	11.5051	3.13114	3.64125	5.04473	1.98275	2.85542	2.08203	6.92718	4.06249	4.1428	3.55887	4.91538	3.41621	3.36985	3.71534	3.91281	4.67623	2.16472	3.18146	5.37942	2.81537	2.03385	4.30535	5.22457	4.63284	2.88123	2.21767	3.36023	2.98457	7.68888	2.52888	4.63037	1.84955	6.14285	8.81196	2.74908	4.65062	6.16615	2.23601	3.54666	4.48141	2.09519	6.70619	4.94176
ACH-000851	MORCPR	MORCPR_LUNG	1.5191	0.95549	0.949565	2.63441	2.49498	2.07203	1.56786	0.866895	1.10175	1.26193	1.41115	1.29541	1.33214	2.66695	2.92195	1.55018	1.6038	1.98251	2.66637	2.18902	1.43893	1.99733	0.951049	1.90232	2.22223	1.30352	1.9535	3.1465	1.43229	1.47814	2.09079	0.910207	1.08799	2.1352	2.0044	0.848155	0.658782	1.64052	0.476006	1.54646	1.35455	1.08134	0.7394	1.19456	2.2077	1.93958	0.878071
ACH-000854	OCIMY5	OCIMY5_HAEMATOPOIETIC_AND_LYMPHOID_TISSUE	0.325045	0.260556	0.322609	0.13337	0.446943	0.529686	0.685624	0.500214	0.697361	0.403509	0.352103	0.295588	0.265051	0.533303	0.265244	0.480159	0.307324	0.166951	0.358593	0.240128	0.311061	0.498813	0.173871	0.356747	0.223965	0.20799	0.231578	0.337372	0.339218	0.353443	0.329348	0.135255	0.214938	0.0951568	0.135363	0.495244	0.271961	0.157535	0.444767	0.243741	0.668066	0.36359	0.275316	0.436315	0.257743	0.688967	0.336782
ACH-000862	KMBC2	KMBC2_URINARY_TRACT	2.26525	1.81038	1.41588	1.26576	1.52092	2.80418	2.32211	2.25675	1.05603	1.19256	1.7843	3.20875	2.10051	1.84948	2.64075	6.16541	2.43483	1.06083	2.29216	2.20783	7.01687	1.64654	4.28852	3.619	2.15552	2.58657	2.80142	4.00584	2.08521	1.76238	3.4349	2.5334	2.33772	2.3978	2.03971	3.51759	1.68823	1.37103	2.47282	1.85716	2.03275	3.54592	3.23598	3.02387	1.11999	5.05581	0.657128
ACH-000868	HCC1195	HCC1195_LUNG	4.80307	0.765221	5.03305	3.12019	4.29909	2.98462	2.09441	4.94035	6.05888	3.33743	3.86245	10.4819	4.10544	9.45896	4.2145	4.51223	3.18875	4.2777	5.52565	5.26555	2.14566	4.54286	6.37296	6.74664	4.9591	8.11571	4.78754	6.67568	11.5995	3.67754	6.9291	5.4656	3.44694	2.81366	4.77304	3.05244	8.4093	3.51688	5.40957	4.08854	3.56127	3.77787	2.44306	5.77135	6.13315	6.29412	10.0762
ACH-000870	NCIH1930	NCIH1930_LUNG	0.800459	1.05817	1.00244	2.00117	0.928654	0.352225	0.896708	0.697562	0.663354	0.609184	0.922312	0.321792	1.26833	1.09487	1.19507	1.12143	0.455788	1.0602	0.427308	0.585626	0.774977	0.375645	0.886343	0.878746	0.466648	0.853878	0.830644	0.962789	0.672195	0.903904	0.676921	0.601674	0.710259	2.14572	0.534695	0.751918	0.478318	0.519704	0.466324	0.908206	0.484631	0.801536	0.73414	0.84644	0.253845	0.531747	0.170595
ACH-000872	HCC515	HCC515_LUNG	2.63897	2.36474	1.78259	7.68238	1.36299	2.83501	2.16682	2.90463	3.83862	1.99732	1.4187	2.90982	1.57289	1.23296	4.13746	2.67689	1.69104	3.15232	1.42306	2.05259	0.622317	3.00592	4.26408	4.32868	2.51763	2.30545	2.40519	5.37248	2.32889	1.43207	4.70878	2.54195	3.031	1.77067	1.66425	1.72165	1.72142	3.20798	1.92173	3.77492	1.9402	1.78381	2.70443	1.6436	3.53693	2.33187	1.58287
ACH-000877	EB1	EB1_HAEMATOPOIETIC_AND_LYMPHOID_TISSUE	0.170915	0.158177	0.143587	0.258483	0.219168	0.20407	0.213568	0.107352	0.241091	0.11213	0.162217	0.110745	0.200679	0.151887	0.0879388	0.139193	0.0726737	0.240207	0.081001	0.109917	0.155061	0.0699528	0.0402288	0.193741	0.231306	0.121944	0.0546404	0.274781	0.22586	0.231981	0.138653	0.0664124	0.225211	0.147503	0.213319	0.109664	0.219177	0.248429	0.192537	0.107895	0.171222	0.170145	0.125937	0.126443	0.133604	0.130039	0.216057
ACH-000884	MDAMB435S	MDAMB435S_SKIN	2.21854	3.37994	1.55865	2.07215	2.97862	1.92176	2.86307	2.04732	2.93347	3.1603	2.59867	2.24649	2.02032	1.7546	2.75571	1.13223	2.17286	1.20604	1.84133	3.07807	1.93718	2.34015	1.91899	2.73164	0.905671	3.44349	4.44336	1.05553	1.55291	1.72081	1.10868	0.793032	4.24276	2.17354	1.63341	3.25775	2.06031	1.21015	2.86777	2.4289	2.23647	3.91413	2.87845	2.81653	2.16267	2.53627	1.30249
ACH-000887	SF172	SF172_CENTRAL_NERVOUS_SYSTEM	2.42815	3.20186	3.44161	1.74853	1.64578	3.46669	3.68055	2.6316	2.06384	3.32227	1.84296	3.28146	1.23108	1.5572	0.890208	1.1506	1.41015	4.03097	3.65405	1.56537	2.69378	2.07747	2.43169	3.12171	2.4303	2.81474	3.06122	2.87004	3.02512	1.93202	3.13964	0.75365	1.62239	4.3411	1.37275	2.97688	4.59275	2.3319	2.8985	3.51391	0.54942	1.33169	3.16446	1.66309	1.23959	1.72203	1.56464
ACH-000889	KMM1	KMM1_HAEMATOPOIETIC_AND_LYMPHOID_TISSUE	0.603049	0.987213	0.162736	1.04046	0.504317	0.235769	2.55183	0.322497	0.238455	0.401048	0.928367	0.414755	0.283859	0.332572	0.37196	0.540868	0.219694	0.124635	0.655575	0.573602	0.473335	0.256115	0.595725	0.431155	0.587688	0.492826	0.751081	0.315767	0.375285	0.676872	0.295712	0.262978	0.606565	1.07299	0.331514	0.354329	0.306481	0.198781	0.305319	0.549448	0.650547	1.71273	0.252899	0.539561	0.32575	2.24444	0.32054
ACH-000891	HCC1438	HCC1438_LUNG	2.16227	2.23473	2.10245	2.10233	3.19066	2.53829	2.84919	1.45674	1.5118	2.37585	2.91452	3.71424	3.55123	1.65066	2.70932	2.28591	0.530068	2.18554	2.05726	1.81657	2.32376	2.80032	2.49913	1.71929	1.51449	2.10765	1.66063	2.94932	1.68375	2.10067	1.65423	3.15671	1.15856	1.80942	1.72762	3.68962	2.46486	1.77446	1.40281	2.53589	1.43003	1.90013	2.59006	3.1274	1.53154	1.69225	1.39465
ACH-000897	FTC238	FTC238_THYROID	1.67398	2.25961	1.38561	1.29275	2.24112	1.90587	1.4222	1.41915	1.00979	1.9264	0.974075	1.62298	1.39155	1.3652	1.36282	1.50378	1.46598	3.25594	0.500773	1.08478	2.02239	0.876949	1.81551	0.865496	1.9084	1.40347	1.13846	0.593342	2.39305	1.21977	1.74933	1.60284	1.93498	1.45949	1.08263	1.57993	1.94558	1.31016	2.1482	1.56284	2.36671	1.80594	2.41804	1.50826	1.27621	0.794112	1.7304
ACH-000898	SNU719	SNU719_STOMACH	3.28857	3.191	2.22767	2.83261	2.88093	4.66355	1.65059	3.73152	2.05731	2.51778	4.32701	4.81231	2.32787	3.76804	1.09497	3.17903	5.95334	3.21766	2.65068	3.25348	3.23385	1.64411	4.64702	4.6166	3.61279	4.46349	4.27803	1.79043	5.10512	3.25569	2.73068	2.53406	2.47451	1.37777	3.40155	4.36161	1.18587	3.36578	2.68418	2.87885	5.03542	3.50621	1.3023	4.76192	2.49338	6.15529	4.18407
ACH-000899	WM88	WM88_SKIN	2.53075	2.52802	1.73706	1.63486	1.22151	1.9514	2.77055	2.63156	2.92869	2.95457	2.11526	4.30727	1.0774	2.55291	2.86721	1.24824	2.354	1.50123	4.62049	2.82085	2.08101	4.24971	4.71095	2.25876	1.89747	2.62678	4.13051	2.10683	2.19099	1.51888	2.23468	3.18957	3.3254	2.38404	2.24257	1.01424	1.85222	1.97486	2.50948	3.96424	3.36663	1.68916	1.36502	1.78206	2.4229	2.36463	2.64794
ACH-000901	HCC1359	HCC1359_LUNG	1.88902	1.24786	2.59925	2.1627	1.63235	1.39778	1.20034	1.93758	1.62962	1.61103	1.2106	1.85844	2.30726	1.95664	2.04301	1.27041	1.62104	4.32833	1.86774	1.25063	2.47562	2.13345	1.91371	1.14834	2.04799	1.61902	1.51215	1.13937	2.13141	1.61283	1.08958	2.833	2.9614	1.62684	1.19197	1.79821	2.43657	1.56532	2.94371	2.17546	3.23384	1.61331	1.74873	1.67137	1.49099	0.774158	2.70446
ACH-000902	CAL148	CAL148_BREAST	2.91414	2.50611	2.16002	3.05088	5.01752	2.83357	1.37999	3.74487	1.77014	1.2912	6.27906	3.38405	1.77584	2.04451	3.41433	2.19356	2.25319	3.457	3.26464	2.47123	3.3305	3.18788	4.92048	1.53533	1.90553	2.10595	3.20576	3.04021	2.1226	3.36169	1.38914	1.95986	3.31846	1.01421	1.41656	3.194	2.99882	3.21739	5.90497	2.24063	2.07632	1.99193	3.77758	4.1474	1.79226	2.77266	2.10225
ACH-000904	NCIH2106	NCIH2106_LUNG	1.00388	0.589737	0.558197	0.82302	2.5788	0.636523	0.79699	0.746444	0.62844	0.667384	0.712765	0.650056	2.88779	0.664523	0.881704	2.07556	0.871067	1.33079	0.649927	0.774981	1.88104	0.39533	1.55409	0.936648	0.730921	0.57738	0.60043	1.35426	0.321731	0.451784	1.49766	1.36161	0.824931	1.93434	0.934656	2.04012	0.319497	0.320853	0.950143	0.992122	0.83509	0.529179	1.01344	1.22949	0.43758	1.32803	0.466929
ACH-000907	SNU349	SNU349_KIDNEY	3.9353	1.69562	4.9396	1.27956	1.72363	6.80898	3.17795	2.53645	2.38338	2.98403	1.28167	1.52691	5.40411	2.21698	1.77435	5.46891	3.65869	2.90249	2.1409	5.78533	2.47658	2.79421	2.02578	6.12505	4.74632	3.74976	2.68378	1.54472	4.70214	2.55317	2.32053	4.77313	12.3902	4.52282	5.02319	0.770125	7.43407	9.11412	3.98737	1.61639	2.97294	7.05688	4.12904	3.28975	5.98717	1.58131	2.07452
ACH-000908	SNU520	SNU520_STOMACH	1.58899	2.21598	2.35792	0.891723	0.716355	2.75088	0.870751	0.764895	1.15855	3.01874	3.12652	1.54693	0.610296	0.762193	1.10371	0.533794	1.32014	1.90614	1.85409	2.32959	0.740365	1.44871	0.143434	4.91295	1.79902	1.88264	1.46165	4.56701	0.598815	1.68123	3.30021	0.454784	0.84276	2.63207	1.66783	2.32818	2.43712	1.2132	0.863315	0.681691	1.64992	0.839778	0.728392	2.48032	1.76902	1.55575	0.537391
ACH-000909	JHUEM2	JHUEM2_ENDOMETRIUM	2.6362	3.24693	2.48846	8.60053	2.51477	1.34259	1.63813	2.06088	1.72766	1.90759	3.93143	2.42434	1.9399	3.63214	2.20924	0.70818	3.49971	1.84361	2.37296	4.32812	3.32233	2.76755	4.27511	1.36694	2.81221	1.60849	3.71829	2.42718	3.53305	1.77869	2.06756	1.68214	1.34645	1.28865	3.35247	1.71382	1.70134	3.09358	4.84948	2.24844	4.22874	0.827793	2.17446	3.15503	1.73268	1.89132	4.71707
ACH-000912	NCIH2286	NCIH2286_LUNG	1.25346	1.05727	0.816732	0.794317	1.73926	2.00367	1.04642	0.660357	0.868367	0.946997	2.20139	0.290178	0.991953	0.544852	1.61702	1.67949	1.3087	2.29036	1.8042	0.653944	1.68866	1.16246	1.08474	1.31772	0.673849	0.82156	0.814816	1.79073	0.528263	1.61003	0.682001	0.566811	1.25948	2.48538	0.946047	0.886106	1.55377	1.67116	1.08456	1.33914	0.772491	0.705223	0.86217	0.976573	1.23213	0.541698	0.446421
ACH-000921	NCIH1339	NCIH1339_LUNG	1.2624	1.57789	1.11712	1.26248	1.11091	1.06793	2.3638	0.772412	0.641074	1.53852	1.26601	0.861055	1.23039	0.721566	1.75926	0.813139	1.00087	1.3448	0.678484	0.926889	1.38925	0.959386	1.31844	0.882835	2.10463	0.884673	1.10406	0.685139	0.521873	0.761068	1.06163	1.13713	0.938591	2.09497	1.63942	0.369137	1.2873	1.24436	0.889453	1.43817	1.34854	1.13995	1.2789	0.720323	1.05565	1.4835	0.662623
ACH-000923	BCP1	BCP1_HAEMATOPOIETIC_AND_LYMPHOID_TISSUE	0.225849	0.111504	0.208275	0.0967691	0.298655	0.111285	0.305459	0.233704	0.303338	0.43264	0.158002	0.810727	0.469768	0.459612	0.352577	0.241122	0.138165	0.119295	0.0872952	0.0932253	0.0480324	0.27826	0.172837	0.165495	0.173793	0.516931	0.109717	0.119044	0.211356	0.264785	0.386491	0.0835044	0.300471	0.050748	0.0565648	0.211228	0.213046	0.143125	0.0917622	0.102982	0.36266	0.4793	0.243418	0.291486	0.0855415	0.0525708	0.163344
ACH-000925	DV90	DV90_LUNG	1.21817	1.08831	0.947223	0.95608	1.65892	1.46503	1.3816	1.2084	0.576419	1.04983	1.10568	0.745871	1.5337	0.645936	0.399831	1.38622	1.11468	0.490239	1.15811	0.902242	3.78338	1.57356	1.55349	1.73418	1.27287	1.79515	2.54226	1.2717	1.16869	0.3746	0.543075	0.568387	1.91142	0.470537	0.557359	0.859418	1.39029	0.526322	1.73226	0.582438	1.75616	1.83905	1.70401	1.23093	0.682355	1.74203	0.934388
ACH-000928	JHUEM1	JHUEM1_ENDOMETRIUM	2.58467	2.25419	2.63628	3.4643	1.63767	1.54938	2.21782	2.09579	2.2232	1.25788	1.81428	1.8036	2.31442	3.88556	0.902847	2.16337	3.82257	4.11809	3.06777	2.81082	4.77425	1.6575	3.17639	2.7012	2.50898	2.79368	1.83006	2.49705	2.23016	2.61924	2.40906	3.65419	3.30894	2.95702	2.0893	1.86072	1.44533	2.70439	1.55643	1.44698	4.94267	3.06244	3.08254	1.64005	3.36495	2.09603	3.27958
ACH-000931	HMCB	HMCB_SKIN	0.986182	0.98221	0.471704	1.83552	0.711139	0.510265	1.23124	1.62236	0.719242	0.669865	0.531932	0.5435	0.576878	0.620986	0.135241	0.952539	0.587564	0.744201	0.496072	1.22504	0.939871	0.493601	0.804761	1.10756	0.650839	0.54165	0.811461	0.69312	0.731281	0.712979	0.639662	1.69076	2.23799	0.993977	1.33328	0.546782	0.991498	2.15311	1.10857	1.3104	1.54161	0.904714	1.20677	0.925855	1.43136	2.12347	1.39691
ACH-000933	SNU324	SNU324_PANCREAS	3.65217	1.92953	3.24782	2.97958	3.39831	3.17003	3.02403	2.71378	2.69707	6.3233	1.90326	5.86796	5.93614	5.30185	3.94752	2.85823	1.66715	2.47411	3.26014	2.63698	1.80769	3.74434	2.83957	5.37729	2.42167	8.86818	2.28154	2.87974	4.50148	1.39226	1.95566	5.11695	5.76147	1.87363	3.42599	4.82251	4.25181	1.24994	7.29715	3.47799	12.6859	6.71336	2.24231	1.7074	2.4799	2.00008	4.2614
ACH-000937	PF382	PF382_HAEMATOPOIETIC_AND_LYMPHOID_TISSUE	0.104852	0.141528	0.0820037	0.0591629	0.101263	0.128438	0.0511091	0.0425761	0.103743	0.0691744	0.135364	0.216144	0.161585	0.0573342	0.0695104	0.119309	0.137798	0.08427	0.0510034	0.0762969	0.207325	0.106078	0.156047	0.0569017	0.0666423	0.184215	0.100745	0.113819	0.0943882	0.301149	0.121843	0.0483176	0.081848	0.272997	0.0575895	0.38122	0.026043	0.0564516	0.111542	0.0585657	0.0453353	0.020724	0.0402908	0.126195	0.126387	0.19401	0.0612603
ACH-000941	HEC1B	HEC1B_ENDOMETRIUM	2.10809	1.22729	2.45819	2.33558	2.48165	1.56255	1.33282	2.8875	3.05124	2.10114	1.56334	3.77442	2.6323	1.93965	2.12271	1.55674	1.36997	1.34626	1.96237	1.78213	2.42348	2.27745	3.59079	2.12412	2.16479	1.87994	1.31205	3.0058	1.84151	1.98489	2.03989	1.60447	2.99185	1.46545	1.39445	1.83611	2.16116	3.0942	4.01918	1.43972	5.29941	1.9252	1.03907	2.84573	1.98048	0.754981	3.17301
ACH-000942	HPBALL	HPBALL_HAEMATOPOIETIC_AND_LYMPHOID_TISSUE	0.17718	0.203658	0.192588	0.232495	0.0709364	0.102588	0.0663224	0.149222	0.276162	0.0925118	0.388625	0.363793	0.103084	0.293087	0.137468	0.149015	0.0796995	0.1015	0.13911	0.18476	0.14431	0.275167	0.147471	0.122246	0.287012	0.194078	0.0984115	0.0726079	0.312609	0.624699	0.072869	0.152447	0.119787	0.185736	0.0881979	0.388503	0.0811597	0.232072	0.0600357	0.0746239	0.017489	0.0194671	0.122807	0.232502	0.162666	1.33563	0.169593
ACH-000946	HEC265	HEC265_ENDOMETRIUM	2.88107	1.42405	5.02911	1.47255	2.8345	2.69613	2.00728	5.92468	1.79642	2.8147	2.30221	1.7065	2.79321	8.43275	0.969613	3.68914	3.0607	2.69495	3.29981	2.17224	5.98345	2.76149	1.94896	6.5443	4.29538	2.77958	1.81168	1.63402	8.41582	1.64403	2.59196	0.926891	1.15325	2.43843	1.90343	2.57961	3.90012	2.13022	2.41264	2.13906	4.2856	3.54285	2.03167	2.93722	3.3014	0.669284	2.29676
ACH-000952	MDAPCA2B	MDAPCA2B_PROSTATE	2.98292	2.10847	2.66144	8.45837	2.0134	2.58493	5.81562	2.69992	2.79177	4.53588	2.0261	4.70487	2.11328	5.86466	0.919275	0.745877	3.40964	1.47682	2.0702	1.69262	2.04518	2.56674	4.92756	1.51904	3.38583	2.44033	5.12095	1.53874	12.7646	3.07554	2.41879	3.90883	1.92608	1.60989	2.73033	2.65997	1.7443	1.65942	1.979	3.42699	5.98962	2.11329	3.15863	2.81005	2.1143	3.94452	4.75591
ACH-000954	HEC1A	HEC1A_ENDOMETRIUM	1.98659	1.08005	1.47211	1.61062	1.31732	1.2002	1.42815	2.64524	1.40833	1.98204	1.24665	3.2955	3.20346	2.20224	1.774	2.24327	1.83129	4.76636	2.23548	1.2185	1.49784	2.38775	1.71655	3.20047	1.634	1.89372	1.14523	2.12309	3.10604	1.41813	1.82276	3.7205	2.06187	2.30276	1.50535	1.67945	2.12391	2.41511	1.33443	2.30256	1.73103	1.72444	1.26865	3.01395	3.67801	0.56751	0.704899
ACH-000959	SNUC4	SNUC4_LARGE_INTESTINE	1.10259	1.56454	1.0625	1.58575	1.14509	1.08143	1.08691	0.956987	1.25324	0.76397	1.25177	1.36858	0.898015	0.42663	0.430532	0.874492	1.29595	0.921978	0.828569	2.13389	1.62132	1.9091	0.700617	1.01472	1.29806	1.05244	1.644	0.99802	0.802034	1.46274	1.16098	1.03816	0.635051	0.992086	1.088	1.73852	2.29583	2.19827	1.00724	1.08948	1.13255	1.08899	0.458181	1.86503	1.11817	0.714787	0.472232
ACH-000961	ISHIKAWAHERAKLIO02ER	ISHIKAWAHERAKLIO02ER_ENDOMETRIUM	1.94209	2.55997	1.35282	4.35517	2.08646	1.02153	2.98601	1.81907	0.578385	1.41946	1.65718	1.48337	2.62867	1.61943	1.77609	1.36127	1.21075	1.76465	1.25353	1.84145	2.60029	1.90676	1.29684	1.81607	2.39718	2.01963	1.67484	1.7169	0.915956	1.88183	3.03914	2.79181	1.05307	3.47172	1.90794	1.49443	1.10326	2.44544	2.20446	1.92813	1.15319	1.5481	2.66189	1.85238	2.64025	2.32905	1.86221
ACH-000964	MOLT3	MOLT3_HAEMATOPOIETIC_AND_LYMPHOID_TISSUE	0.0994917	0.192816	0.140464	0.0711369	0.0314308	0.0695478	0.114145	0.0348317	0.0401381	0.0370275	0.262598	0.037102	0.190962	0.0488803	0.0529058	0.040886	0.0922722	0.104657	0.0357865	0.0766263	0.0592833	0.0511139	0.0686511	0.178924	0.143672	0.0690133	0.132333	0.113436	0.0751272	0.284281	0.124058	0.103177	0.130569	0.119844	0.0715431	0.247804	0.0278228	0.0709211	0.153028	0.0919371	0.042299	0.0583071	0.106367	0.178049	0.287022	0.180508	0.0551241
ACH-000967	SNUC2A	SNUC2A_LARGE_INTESTINE	5.69718	4.68476	4.01332	8.89914	5.02104	11.1162	4.31725	4.1861	10.8303	6.83222	3.70734	10.4962	6.61037	6.29411	2.90649	2.867	7.03285	4.07296	4.58267	1.64579	4.926	7.68181	5.39202	3.42691	4.47628	7.2792	5.33283	4.86305	7.45654	10.1104	10.2704	5.11451	9.0078	7.0725	2.38919	3.63156	6.49344	11.8396	6.18239	7.6792	5.34545	5.21453	5.43765	3.40365	3.16257	3.96935	7.67065
ACH-000972	HEC151	HEC151_ENDOMETRIUM	1.01307	0.75828	0.776106	1.35804	1.14255	0.940832	1.19218	1.12786	1.26551	0.931616	0.512923	0.842634	0.818257	1.02411	0.204629	0.988248	0.722106	2.24097	0.913148	0.892071	4.1381	0.999943	0.613345	0.871794	1.26471	0.824743	1.19528	0.888263	1.07321	1.59644	1.03835	0.613479	0.600872	0.956427	0.772327	0.798936	1.18191	0.457586	0.633918	1.13624	2.03255	1.41171	1.2086	0.804587	1.26925	0.868747	0.739788
ACH-000975	HCC2450	HCC2450_LUNG	4.57431	2.88298	6.02987	6.22565	1.87829	4.86852	5.92764	4.93184	2.5126	1.73944	3.76675	1.94846	6.86883	4.75878	3.91743	4.04077	8.488	6.44769	4.58144	5.61001	1.57318	7.11036	4.25314	3.12404	5.84665	2.18289	5.32439	1.52453	6.75194	4.12961	1.52314	5.81646	3.71054	2.77235	6.58729	1.02999	3.93088	3.33206	4.10204	5.63305	3.89644	4.6307	4.16172	7.32638	10.7258	4.81934	4.25364
ACH-000982	GP2D	GP2D_LARGE_INTESTINE	3.26133	2.29798	4.04645	3.86876	3.00857	3.79826	1.50426	2.51715	2.06219	3.34674	2.37929	4.65434	2.43579	4.1189	0.995129	1.75302	6.83499	3.14191	4.4576	3.18336	3.05202	3.00636	2.90962	2.74252	3.68952	4.13091	3.66688	3.15727	3.47451	3.02326	3.25402	1.46105	3.01212	1.95506	2.7953	3.17676	4.33531	4.92475	4.38843	3.01463	2.23236	1.9505	1.63681	1.82587	1.77783	1.46662	4.21114
ACH-000984	HEC6	HEC6_ENDOMETRIUM	2.15736	2.07582	2.55334	1.65214	3.07672	1.52006	1.80338	3.43183	1.37773	0.92088	2.31712	1.65267	2.6386	1.50908	1.10052	5.31323	2.20869	2.13963	1.13762	2.87178	1.32437	2.75301	2.77177	4.05958	1.1636	1.8135	1.49681	2.5272	0.909407	1.35656	1.15324	1.40604	2.3081	3.18937	2.12349	1.02211	1.8305	0.7076	7.26348	0.468336	1.31104	2.5475	6.54606	2.27834	0.81839	1.0717	1.58807
ACH-000989	SNU175	SNU175_LARGE_INTESTINE	0.881691	0.851116	0.299504	3.11189	1.43363	0.645951	0.908054	1.35685	1.30178	0.624451	1.64977	0.84071	0.448529	0.992194	0.653094	0.601984	0.870422	1.27026	0.841626	1.54534	0.907003	1.4964	0.590856	0.869298	0.369806	0.72638	1.44693	1.21454	0.841946	1.0104	0.77914	0.920649	0.505409	0.80315	0.737142	1.3801	0.917996	2.03007	0.527991	0.250249	0.540476	0.917354	0.621003	1.41636	0.448732	0.426552	0.520642
ACH-000990	HEC108	HEC108_ENDOMETRIUM	1.70012	1.17768	1.91993	0.505588	1.42228	1.15832	0.944531	1.92224	0.892483	1.0417	0.906078	1.68962	2.24845	1.11273	0.550901	3.33825	2.15862	1.01884	1.6206	2.78396	8.03786	3.50817	1.27276	5.67673	1.58704	1.8508	1.3884	2.4033	1.95036	1.90332	0.871316	1.05793	1.57235	2.16481	0.990722	1.46505	1.70155	1.27505	1.14465	0.389302	0.923399	1.71817	1.80273	2.26481	1.7938	0.630085	1.38396
ACH-000993	JHUEM7	JHUEM7_ENDOMETRIUM	2.28719	1.55147	2.75849	1.20094	2.38456	1.46412	3.41992	1.69587	2.69752	1.45081	1.89435	2.14116	2.60893	1.61756	2.65903	2.65835	1.57624	4.83223	1.70074	3.17294	4.5182	2.29724	1.8846	2.33885	1.75195	2.8027	1.04813	2.32504	1.4351	2.2109	1.75654	2.26118	1.47877	4.90551	2.05931	1.9719	1.96199	1.5703	2.65063	1.61053	2.22436	2.38471	2.7203	2.35962	1.3265	2.11981	4.42367
ACH-000994	HEC59	HEC59_ENDOMETRIUM	2.65445	2.42433	2.0097	3.54621	5.00906	2.09733	3.28496	2.17675	4.18592	2.25128	1.72073	6.26447	2.65792	3.33611	1.98418	1.92026	3.02088	2.84735	1.70169	1.81439	2.21911	2.51887	3.59007	1.90969	3.04128	3.56555	2.22638	2.43064	4.30518	2.11704	2.34576	1.76098	1.01789	1.36342	2.20267	2.81403	2.53497	1.13356	1.28311	3.67543	1.52569	3.36067	3.41142	2.24179	3.31741	3.03556	7.84979
ACH-000996	HEC251	HEC251_ENDOMETRIUM	1.95905	1.9158	1.56931	2.80592	0.964825	1.83028	1.3887	1.8658	2.00422	1.48631	1.4648	1.4831	1.76823	1.13866	1.70095	2.17298	1.29022	2.29903	1.21598	1.56343	3.44355	1.38505	1.29163	2.43579	1.96181	1.67951	1.1661	1.78116	1.40506	1.13531	2.22559	1.97575	3.69303	2.73843	1.82175	1.00419	1.3867	3.26173	1.95668	1.54149	2.53826	1.50089	2.18838	1.94794	1.92431	1.56022	1.6548
ACH-000999	SNU1040	SNU1040_LARGE_INTESTINE	2.61771	2.83913	2.83077	3.12915	1.36437	1.71309	2.08601	2.6541	2.41484	1.58991	2.34582	3.7332	1.20728	2.54336	0.987504	1.02388	4.24676	1.24492	2.79942	3.06824	1.95587	6.91629	2.11721	1.24016	4.24886	2.77096	3.13323	1.33526	5.05541	2.6245	3.07403	1.54627	1.99704	2.1751	2.05321	1.86512	2.72538	2.61771	1.77502	2.13585	1.89482	1.67515	2.29071	2.30197	1.50052	1.91162	3.47534
ACH-001001	143B	143B_BONE	1.01723	0.579861	1.51425	1.25829	0.426346	0.948588	1.02595	0.718772	1.07455	1.38735	0.821764	0.971153	1.96075	1.91297	0.698441	1.96943	0.931328	0.966333	1.68487	0.88036	0.600404	1.22037	1.0309	2.31024	0.573091	1.35098	1.02639	0.908584	1.54106	0.710833	0.639295	1.49893	0.950878	1.10046	1.04308	0.416505	0.883484	1.25493	1.37619	0.734457	0.810433	0.731702	1.24903	1.0042	0.689052	0.693211	0.61615
ACH-001020	BT16	BT16_SOFT_TISSUE	1.82398	0.96396	2.10572	1.36832	2.07067	2.48105	1.25818	2.16697	1.42278	1.85678	1.16446	5.85162	1.1577	2.64921	1.09881	1.02715	1.99184	1.11724	2.92292	1.89393	2.14754	1.85526	3.24177	0.727437	1.59998	1.55567	2.41034	0.999004	2.73736	2.75735	2.22797	1.51146	0.943121	1.38694	1.9349	1.64114	2.19566	3.21615	1.10261	0.667464	3.32502	1.16672	1.60662	1.77603	0.690448	2.37794	2.95864
ACH-001022	CBAGPN	CBAGPN_BONE	0.581487	0.493361	0.689252	1.69132	1.02402	0.44476	0.457597	0.274253	0.337934	0.334998	0.368849	0.56283	0.745456	1.00623	0.836071	0.661741	0.753345	0.762267	0.542892	0.429159	0.304617	0.349844	0.516473	0.284305	0.19669	0.414488	0.40576	0.373485	0.347682	0.981606	0.37434	0.531961	0.230845	0.186884	0.291633	0.873151	0.330336	0.704307	0.721661	0.74756	1.33645	0.731976	0.516014	0.304906	1.62926	0.125281	0.629953
ACH-001028	CHLA06ATRT	CHLA06ATRT_SOFT_TISSUE	0.853578	0.616194	0.851642	0.431112	1.41057	0.714536	0.712049	0.610454	0.928494	0.761823	0.44514	1.69456	1.04382	0.702645	2.11308	0.82512	0.396554	0.410149	0.849374	0.475763	3.12626	0.454316	0.490264	0.813235	0.411577	1.40289	1.08793	0.741688	0.420321	1.84151	0.955992	0.39763	0.420062	0.399167	0.204996	1.65116	1.57701	0.7923	0.707121	1.00835	0.924119	1.18254	1.08938	0.713291	0.933665	0.532589	0.346508
ACH-001029	CHLA10	CHLA10_BONE	1.07272	1.26778	2.38514	1.06034	0.556077	0.345144	1.93981	0.963671	0.658527	0.60977	0.847468	0.27318	0.534769	0.799281	0.338308	0.70432	1.07788	2.79293	1.05942	1.28947	0.341221	1.06581	0.752627	1.21926	0.798559	0.311217	1.14037	1.53279	1.12919	0.361017	0.750704	2.19821	0.955615	0.855362	0.813805	0.875607	0.382989	1.35432	0.516239	1.7408	0.701957	0.768666	1.34578	1.80565	1.34142	0.747301	1.96113
ACH-001030	CHLA218	CHLA218_BONE	1.23169	1.46791	0.825185	2.26626	1.33969	0.538051	1.37202	0.789068	0.949935	0.862646	1.15968	1.76087	1.92806	1.65633	1.14066	0.943332	0.650903	0.789819	1.28602	1.10378	1.08156	0.742507	1.16427	1.80103	0.600264	2.07162	1.51076	1.55222	0.894532	1.31022	0.925153	1.51796	1.12652	0.454154	1.13437	1.46269	1.21172	0.772738	1.03964	1.69923	1.75598	2.09129	0.735479	0.90965	3.13538	2.10996	1.4714
ACH-001031	CHLA266	CHLA266_SOFT_TISSUE	3.28332	3.07732	6.14396	4.51006	2.31955	2.33309	1.2524	3.12684	2.86213	2.73017	5.34615	11.6835	0.841011	2.62088	3.46244	1.61845	2.68214	6.30899	3.01776	1.31688	5.35923	2.18622	2.30257	3.53299	3.95102	3.97289	3.33595	5.29073	2.30594	9.1806	3.20132	2.5515	3.41393	2.26037	1.93542	2.93975	1.73195	3.80055	6.18613	3.02724	2.59834	2.50519	2.94262	3.44527	3.05453	4.54955	6.21727
ACH-001032	CHLA32	CHLA32_BONE	0.838462	1.36182	1.35346	0.797208	0.631728	0.380319	1.9633	0.317477	0.492885	0.817261	0.889669	0.838709	0.714926	0.571948	0.512895	0.325229	0.377274	1.00941	0.657923	0.812372	0.433572	0.604297	0.826214	1.97269	0.516268	1.42429	0.914838	2.21118	0.466816	0.192009	0.59262	1.16324	0.902265	1.44665	0.71959	0.787548	0.213324	0.357941	0.93077	1.30217	0.403764	0.764347	0.824947	1.1523	1.0579	0.986277	0.615321
ACH-001033	CHLA57	CHLA57_BONE	1.58678	1.44888	3.39041	2.22928	0.630046	1.85948	1.34583	1.20996	2.54714	1.13302	1.46999	1.93554	0.748054	1.00509	1.48956	0.308325	0.928724	2.10779	1.97687	2.29903	0.990352	2.29693	0.750683	2.48478	1.41315	2.03273	0.514962	2.30029	0.585472	2.74903	1.57822	1.37173	1.1044	1.10242	1.1578	2.26315	2.0195	1.03024	1.87108	2.24031	0.769732	0.32822	2.02656	1.43653	3.05825	2.18536	0.953385
ACH-001034	CHLA9	CHLA9_BONE	2.42037	1.65135	4.16075	3.50816	0.853539	1.07654	3.85691	1.88239	2.67035	3.04965	0.772898	3.33315	1.56611	5.61572	1.23063	1.38028	1.73189	2.87498	5.02552	2.47907	0.559732	4.2511	2.37565	4.06691	1.75198	3.57294	3.53678	2.93788	2.97439	1.77996	3.11183	2.98357	1.43269	0.887826	1.50919	1.69584	0.607935	1.51363	1.31266	4.12499	2.28451	2.32017	1.74763	2.14631	4.22115	1.81056	5.85895
ACH-001035	CHLA99	CHLA99_BONE	0.947639	0.440385	1.21362	0.611559	0.886655	0.530296	2.69608	0.871796	1.63296	0.890679	0.474192	0.944514	0.835538	0.778957	0.327624	0.693041	0.271901	0.687495	0.863438	1.04537	0.452773	0.75154	1.51898	0.870869	0.512592	1.4887	0.459681	2.57976	0.724358	0.869801	0.747978	0.792465	1.03127	1.0951	0.750873	1.25056	0.548304	0.668587	0.863042	1.4545	0.539762	1.18491	0.794741	0.766057	2.57938	0.62362	1.22504
ACH-001036	CMK115	CMK115_HAEMATOPOIETIC_AND_LYMPHOID_TISSUE	0.180543	0.0800381	0.0582134	0.0944064	0.182734	0.180784	0.127917	0.174783	0.196948	0.151288	0.246434	0.524531	0.186664	0.265627	0.129894	0.162122	0.243052	0.118545	0.121605	0.193518	0.507331	0.194981	0.391614	0.198987	0.105067	0.200629	0.155417	0.316785	0.326185	0.202819	0.335898	0.160988	0.194787	0.0981185	0.0849795	0.141136	0.0966883	0.0929417	0.355648	0.0960907	0.378529	0.199399	0.109094	0.180891	0.174801	0.232261	0.173689
ACH-001038	COGE352	COGE352_BONE	1.00662	0.857553	1.60124	0.48372	0.278906	0.784309	1.41239	0.779823	0.921964	1.43626	0.357825	0.541287	0.932813	0.970956	1.29625	0.418674	0.96734	1.23995	1.0135	0.582274	0.4038	1.1888	0.337628	1.33946	0.894179	1.0471	0.721033	1.1481	1.14536	1.83714	0.688205	0.930599	1.11749	0.528955	0.768248	1.22905	0.701571	0.613557	1.4286	1.94552	0.846143	0.992416	0.884566	0.762026	1.48945	0.390187	1.57433
ACH-001041	COLO699	COLO699_LUNG	0.8503	0.951464	0.364095	1.2747	1.7718	0.707277	1.13611	1.41304	0.826263	0.462852	0.286656	0.849636	0.332772	0.754184	0.409294	1.25433	0.889288	0.523834	0.481231	1.10788	0.926412	0.387138	0.940642	0.59604	0.642291	0.730046	1.29176	0.856672	0.647769	0.405076	0.435366	0.89784	1.17027	1.8642	0.709758	0.809291	0.609566	1.05115	0.741515	1.21356	0.676861	1.14146	0.367447	0.61243	3.5148	1.26386	0.928983
ACH-001048	COV504	COV504_OVARY	5.03668	4.89489	15.6479	2.75202	3.49448	3.86945	6.81794	6.32262	4.82971	6.7843	3.57759	3.30361	6.0457	4.56483	4.0791	4.69842	6.21641	9.14296	6.14422	6.77385	3.0978	4.94856	5.45012	2.59061	3.35849	2.81398	4.59236	3.80024	6.96294	4.32028	3.87286	6.93117	5.9889	3.84158	6.89638	2.46079	2.58547	3.77157	3.22001	8.99922	2.94376	4.10844	4.74574	9.17015	9.29938	4.09662	5.69447
ACH-001050	CW9019	CW9019_SOFT_TISSUE	3.22152	2.25743	4.17089	2.38185	4.84385	2.5482	4.78919	3.9218	3.39766	4.9235	1.20242	5.70465	4.4212	5.43256	1.48758	2.57145	3.01817	1.66059	1.97427	4.42824	1.19499	2.24033	3.33928	1.51965	2.46266	6.65238	4.29788	3.07833	4.97547	1.25411	2.79785	4.23773	2.88786	2.44086	3.10091	1.79816	3.64343	1.55908	2.80639	2.31037	3.07197	3.89972	3.5101	3.05619	1.77092	3.18886	5.64676
ACH-001053	D425	D425_CENTRAL_NERVOUS_SYSTEM	0.749999	0.885255	0.563954	1.08471	0.324816	0.588648	1.07058	0.777561	0.435887	0.472667	0.34423	1.11801	0.892322	0.642448	0.515875	0.94681	0.26374	0.977822	0.167264	0.363052	0.445893	0.18495	0.596331	1.37303	0.814671	1.07033	0.257965	0.2786	0.691294	0.163427	0.517434	0.42209	0.846239	0.540931	0.647142	0.304263	0.296229	0.459053	0.752851	1.32043	0.6102	0.533145	1.28581	0.667202	2.10744	1.06731	0.306521
ACH-001054	D458	D458_CENTRAL_NERVOUS_SYSTEM	0.64039	0.909363	0.457887	0.884158	0.491102	0.179538	1.77325	0.333136	0.734738	0.552559	0.223506	0.510157	0.619689	0.35094	0.710135	0.496237	0.117296	1.08907	0.305231	0.414342	0.21544	0.218592	0.554059	1.11665	0.655019	0.556841	0.28083	0.392051	0.658025	0.371796	0.666322	0.225544	0.697043	0.440889	0.641439	0.156343	0.356637	0.629139	1.00893	1.47693	0.512202	0.817705	1.27528	0.557049	1.04896	0.436052	0.241019
ACH-001057	DERL2	DERL2_HAEMATOPOIETIC_AND_LYMPHOID_TISSUE	0.236741	0.117124	0.148004	0.214633	0.771694	0.0781306	0.0657754	0.329233	0.288328	0.10939	0.0780659	0.0674052	0.319321	0.484565	0.283058	1.23705	0.514932	0.203287	0.160812	0.147618	0.558386	0.200949	0.409996	0.124646	0.19312	0.126305	0.124934	0.118336	0.612797	0.219363	0.19667	0.118792	0.29167	0.095003	0.170066	0.0432116	0.169999	0.309809	0.174072	0.0510644	0.516901	0.275292	0.0990522	0.124984	0.481336	0.112531	0.5519
ACH-001059	DL	DL_SOFT_TISSUE	2.12861	1.68471	4.3808	1.13615	2.4798	1.9775	1.26278	2.41483	3.38389	1.0723	3.69804	2.50229	2.13683	1.25718	1.62835	0.94953	2.02232	1.21513	1.51006	1.59868	4.16397	1.89642	0.440304	0.892224	0.896829	1.34326	0.643014	1.70833	0.969697	6.57843	1.03757	2.29103	2.97827	1.26479	0.814365	5.66109	1.72797	5.41041	2.86918	1.33538	3.49403	0.944506	0.691333	3.02601	3.2878	1.02025	0.439356
ACH-001060	DL40	DL40_HAEMATOPOIETIC_AND_LYMPHOID_TISSUE	0.174183	0.064143	0.16795	0.305746	0.42979	0.0705076	0.0690066	0.135049	0.174802	0.0754333	0.0912122	0.279004	0.162397	0.210715	0.132476	0.179476	0.246675	0.250648	0.119593	0.132043	0.279626	0.10182	0.127442	0.164775	0.0553084	0.0976696	0.0644024	0.52511	0.107226	0.44967	0.188348	0.186169	0.338511	0.0369091	0.0970224	0.143405	0.0339015	0.246419	0.122028	0.205694	0.327203	0.173884	0.0792685	0.109417	0.817297	0.043254	0.165698
ACH-001061	DLD1	DLD1_LARGE_INTESTINE	1.97029	2.25639	2.87217	2.60155	3.37209	1.22146	1.35035	2.12401	1.65704	1.75088	2.14808	2.07439	1.33037	1.40121	1.30111	1.93294	1.53161	2.17981	1.33261	3.731	1.7212	2.99129	1.01827	2.91582	1.3699	1.65401	2.33274	3.32227	1.25699	1.77728	1.74195	1.59299	0.774212	0.884767	1.31218	6.57944	2.15056	1.52022	1.15116	2.13595	0.807935	2.46038	2.44294	6.13864	2.36306	1.29074	1.81402
ACH-001067	F5	F5_CENTRAL_NERVOUS_SYSTEM	1.89814	1.55611	2.24753	1.16744	2.09245	1.31317	1.65352	2.22313	1.86215	1.56471	1.20277	1.82972	0.913105	3.10856	1.83809	0.986796	2.10045	1.14023	1.89571	3.35151	1.71705	1.64302	1.22188	0.818163	0.585394	1.05295	2.48412	1.50113	1.48289	2.86482	0.708066	0.908756	2.55457	1.33044	1.05605	3.04243	2.02711	3.8506	1.64551	1.29916	3.10296	2.26456	0.908962	1.38834	1.30242	0.764967	7.8867
ACH-001068	FEPD	FEPD_HAEMATOPOIETIC_AND_LYMPHOID_TISSUE	0.15352	0.0314457	0.227635	0.0956079	0.187343	0.110357	0.0884697	0.0989976	0.240944	0.190953	0.0655043	0.0844112	0.363866	0.176751	0.12927	0.180444	0.265838	0.114893	0.180521	0.223108	0.0469578	0.0787544	0.178	0.269367	0.178098	0.243689	0.0953175	0.195568	0.275313	0.226195	0.127544	0.12876	0.144385	0.0657094	0.109905	0.297332	0.144068	0.194298	0.184314	0.10548	0.109211	0.116235	0.112683	0.14234	0.201513	0.0771765	0.396176
ACH-001078	HCC1588	HCC1588_LUNG	2.36079	2.67659	1.66456	2.77381	1.95238	1.93125	2.04336	1.69406	2.90366	1.35679	3.53907	2.01615	2.0564	3.35314	1.63659	2.01565	2.31546	1.429	2.71752	4.5716	1.19771	1.37354	1.79479	1.33897	2.04545	1.25081	3.15166	1.64293	1.90052	1.86562	3.39518	3.23495	2.00946	1.70251	1.70225	1.61649	2.27065	3.45221	1.36258	1.56365	3.79578	4.00412	0.895928	2.42985	2.05522	2.42532	2.611
ACH-001096	JR	JR_SOFT_TISSUE	1.14133	0.448001	0.627386	0.590489	0.734327	0.949434	2.99277	0.64968	1.53038	1.74065	0.413923	1.38325	1.08394	1.35533	0.887812	1.05043	0.70642	0.596302	2.38001	0.850736	0.807858	0.518461	0.984715	1.28032	1.43625	1.70898	2.79527	1.22263	2.04203	0.773187	0.812106	0.645231	1.49332	0.804139	0.481547	0.458419	1.90533	0.677116	0.680183	1.889	1.72651	2.16651	0.599507	0.827859	1.70433	3.24057	1.56407
ACH-001097	KARPAS384	KARPAS384_HAEMATOPOIETIC_AND_LYMPHOID_TISSUE	0.102854	0.0203248	0.0897282	0.0866891	0.128659	0.0509455	0.0422383	0.0763622	0.126467	0.0354474	0.0259402	0.0354323	0.260679	0.0838123	0.0391353	0.190912	0.106068	0.154527	0.0572	0.0835334	0.460819	0.0260312	0.104264	0.11192	0.110324	0.127837	0.0585952	0.057731	0.0796341	0.25979	0.110184	0.0624032	0.160792	0.0345012	0.0498366	0.0679756	0.0872184	0.214826	0.116453	0.0595955	0.163533	0.140715	0.0614763	0.0548065	0.180539	0.106686	0.147838
ACH-001098	KCIMOH1	KCIMOH1_PANCREAS	2.56529	1.08279	4.25341	3.01835	4.55874	3.7134	1.93714	1.51306	4.63276	3.18377	0.980672	4.87339	2.25462	3.08658	5.2953	3.32665	2.42043	2.14008	2.01328	2.42264	1.61308	2.53213	2.59087	2.7627	0.999222	5.49993	1.36782	3.20405	1.13106	3.39889	2.00517	1.53652	2.60107	2.52751	1.87601	3.49393	2.25533	3.08521	5.14894	1.30522	3.65618	2.70815	0.798053	1.21909	1.98865	1.05896	2.57553
ACH-001099	KD	KD_SOFT_TISSUE	1.96043	2.27754	2.5608	1.23366	1.02291	0.950584	1.81024	2.50156	2.25956	1.5997	2.82396	1.15463	2.22961	0.977949	1.75794	0.472705	1.85757	1.56504	2.35113	6.33368	3.79125	4.06149	0.837361	1.82984	1.85248	1.13423	3.41102	1.52017	0.847752	4.61139	1.14239	4.378	1.36307	1.21782	1.71914	1.3898	1.07827	5.23265	1.30599	1.127	1.81655	0.913802	1.28988	2.31309	1.32706	2.89976	2.02529
ACH-001100	KHYG	KHYG_HAEMATOPOIETIC_AND_LYMPHOID_TISSUE	0.182084	0.0581899	0.0666229	0.100084	0.55544	0.146105	0.107419	0.152045	0.228906	0.0770127	0.208939	0.140883	0.152052	0.224991	0.170742	0.393385	0.139555	0.14767	0.0490907	0.361647	0.347326	0.0722706	0.163859	0.192678	0.126208	0.097445	0.103851	0.155644	0.152586	0.272324	0.219532	0.0841207	0.140386	0.0458997	0.11987	0.0338703	0.151292	0.327848	0.145102	0.133847	0.870972	0.783253	0.100579	0.20246	0.16343	0.180145	0.227237
ACH-001109	KPMRTRY	KPMRTRY_SOFT_TISSUE	2.1731	2.10177	1.80108	1.48786	4.24635	2.6211	1.9037	3.27482	3.68983	1.32161	2.93894	1.99932	0.880751	4.50519	1.53468	0.718361	1.33705	2.37222	1.94097	2.59629	1.74127	2.48775	2.18075	1.84604	0.659463	1.9536	3.73019	2.2735	1.85615	3.22351	1.93067	1.85819	2.28479	1.50832	1.59342	2.62273	2.31742	3.81217	2.4555	1.76166	3.98276	1.45237	2.67133	1.98543	1.96186	2.19385	3.47727
ACH-001111	L82	L82_HAEMATOPOIETIC_AND_LYMPHOID_TISSUE	0.119831	0.0389643	0.093373	0.0613756	0.106199	0.110611	0.136951	0.11707	0.218508	0.102788	0.0867744	0.103156	0.254592	0.142261	0.0832581	0.152607	0.0752863	0.122006	0.058001	0.13102	0.101235	0.0520348	0.135568	0.196133	0.132733	0.106644	0.109218	0.286928	0.115508	0.347607	0.128135	0.0663272	0.108648	0.0915762	0.108489	0.0506174	0.100218	0.156101	0.164653	0.0876188	0.0891524	0.0288681	0.0920886	0.0815163	0.0827333	0.130255	0.155577
ACH-001113	LC1SQSF	LC1SQSF_LUNG	2.68077	3.53946	3.08802	4.37699	3.00078	3.87229	3.1222	4.53623	3.15328	2.32831	1.72533	1.55958	1.98356	3.53131	2.90355	2.76935	5.03531	3.19519	2.67952	2.81116	0.823292	2.27842	2.59692	1.04998	1.17496	1.68726	1.3827	2.79403	0.655922	2.95354	1.87861	3.55013	3.21417	1.91499	3.09739	2.67477	0.873035	2.53787	1.18215	2.15125	1.45585	2.53426	2.35806	2.36003	2.65814	1.16296	3.49876
ACH-001119	MAC2A	MAC2A_HAEMATOPOIETIC_AND_LYMPHOID_TISSUE	0.107445	0.0524349	0.142101	0.0509524	0.108645	0.0877234	0.0547781	0.146378	0.164971	0.0553195	0.0376506	0.161867	0.1428	0.0623	0.281525	0.175769	0.059542	0.0441572	0.117626	0.143853	0.142306	0.0820149	0.0467421	0.42232	0.0872098	0.184872	0.0793628	0.156289	0.127452	0.202075	0.176971	0.0841352	0.0590694	0.0806194	0.0853852	0.102348	0.120129	0.109152	0.0894666	0.0666166	0.0723784	0.0788966	0.156257	0.0566799	0.0822697	0.0373674	0.140577
ACH-001128	MON	MON_SOFT_TISSUE	1.67386	0.842806	2.04886	0.951151	2.12072	1.85473	2.52401	1.77558	1.98756	0.952863	1.87255	2.36824	2.29394	2.55555	0.668324	2.80531	4.36652	0.935959	2.446	1.15186	3.7312	1.59114	2.39379	1.28345	0.949781	1.12387	0.778832	0.384252	0.967599	1.69769	0.708967	0.642523	2.266	0.95254	0.918386	0.454071	1.82532	1.77451	1.27628	2.61392	2.37922	3.14048	1.05838	1.36014	1.66796	1.48777	1.77585
ACH-001129	MONOMAC1	MONOMAC1_HAEMATOPOIETIC_AND_LYMPHOID_TISSUE	0.124444	0.213342	0.0914243	0.160484	0.0483981	0.0896297	0.117989	0.0856654	0.0202228	0.179853	0.0945907	0.125981	0.104005	0.144275	0.0473419	0.129428	0.231346	0.108907	0.0452286	0.197935	0.138058	0.138877	0.0646659	0.190328	0.133264	0.118507	0.0873841	0.0318089	0.0810449	0.0362934	0.060177	0.264947	0.12039	0.0514773	0.129613	0.151706	0.0502132	0.390637	0.265649	0.106706	0.218277	0.159059	0.20494	0.102762	0.13594	0.104442	0.0546258
ACH-001132	MTA	MTA_HAEMATOPOIETIC_AND_LYMPHOID_TISSUE	0.119603	0.0695578	0.0727078	0.0844599	0.203158	0.0896704	0.0733127	0.105651	0.173773	0.0704254	0.147667	0.183742	0.0973392	0.10326	0.101608	0.101295	0.114478	0.0685139	0.0963263	0.104809	0.21812	0.103426	0.0978497	0.0651687	0.0646697	0.0542297	0.0762024	0.124654	0.119971	0.114947	0.200178	0.0978652	0.137937	0.0681349	0.113688	0.0331224	0.0335219	0.281093	0.109217	0.138689	0.439189	0.199222	0.0607102	0.131109	0.108542	0.102711	0.108742
ACH-001134	MYLA	MYLA_HAEMATOPOIETIC_AND_LYMPHOID_TISSUE	0.304044	0.0434732	0.164071	0.145216	0.369446	0.644616	0.0994162	0.370384	0.256153	0.169756	0.235468	0.21418	0.0543339	0.39326	0.4295	0.356801	0.486752	0.163038	0.30797	0.0671209	0.135389	0.0561022	0.241405	0.262455	0.455777	0.244669	0.109942	0.145575	0.541042	0.574148	0.414608	0.050014	0.285036	0.127492	0.203228	0.516137	0.55552	0.505393	0.207289	0.132518	0.765031	0.157789	0.152588	0.271595	0.427557	0.293771	0.562602
ACH-001142	NHAHTDD	NHAHTDD_PRIMARY	4.25183	7.97018	7.73525	3.31348	1.7933	2.87572	3.68949	2.68905	2.65213	5.26944	5.26626	3.02024	6.14321	5.39963	3.30791	4.42065	6.31638	2.75586	5.51164	4.58487	2.27035	4.68214	3.71812	2.79247	4.9177	2.9649	5.75	2.25052	3.42923	2.63526	4.34861	2.48197	5.01583	5.05146	5.80093	1.75667	3.03523	5.46327	2.99726	3.47326	3.38143	3.73254	3.39734	3.69622	1.84609	6.37539	4.28651
ACH-001145	OC316	OC316_OVARY	1.12533	1.03474	2.83073	0.960032	0.826038	0.947056	1.35586	1.22912	0.625038	0.488782	0.34973	0.624934	1.24594	0.697507	0.295037	1.00929	2.38075	1.94079	1.00272	1.33124	0.673362	0.95032	1.00504	0.821417	1.01184	0.670957	0.617299	0.460088	1.04389	1.01227	0.610932	2.12632	1.05228	0.838718	1.08386	2.75721	0.619838	1.68794	0.805166	1.23477	0.883753	0.745526	1.4538	1.56624	2.51569	0.693788	0.532609
ACH-001147	OCILY12	OCILY12_HAEMATOPOIETIC_AND_LYMPHOID_TISSUE	0.128093	0.0790757	0.0555806	0.0900092	0.14255	0.0815994	0.112643	0.109231	0.10448	0.137865	0.0770297	0.180408	0.125478	0.143294	0.216361	0.167197	0.158688	0.0727489	0.18162	0.109304	0.247727	0.107696	0.140697	0.154926	0.0559838	0.120147	0.151475	0.188612	0.125053	0.176767	0.175138	0.0508643	0.161104	0.0679057	0.0860023	0.0955956	0.0796633	0.213613	0.220741	0.115287	0.322586	0.151092	0.0683281	0.118426	0.066179	0.138987	0.224858
ACH-001148	OCILY132	OCILY132_HAEMATOPOIETIC_AND_LYMPHOID_TISSUE	0.245172	0.117933	0.217309	0.385798	0.712132	0.0549831	0.102828	0.257414	0.385468	0.0625902	0.442519	0.492147	0.199465	0.320926	0.149577	0.162883	0.170963	0.0841986	0.482804	0.438607	0.231493	0.285098	0.266415	0.0819868	0.0792032	0.227021	0.351812	0.192758	0.496749	0.178535	0.211999	0.173518	0.199249	0.205562	0.221228	0.133926	0.0928198	0.0802898	0.135684	0.315209	0.226556	0.27378	0.197933	0.32393	0.128515	0.153958	0.220929
ACH-001163	CCLFPEDS0001T	PEDS005TSUSP_KIDNEY	0.760037	0.234336	1.44697	0.218377	0.320035	0.276285	0.266152	1.91795	0.625774	1.07057	0.244005	0.802305	0.414401	1.45094	0.673644	0.508633	0.788735	1.59644	1.11567	0.75038	0.323526	1.353	0.849665	0.832267	0.672207	0.621168	0.618816	1.01714	1.25734	1.01305	0.783543	0.235581	0.798105	0.197197	0.40345	0.352714	0.415786	1.53042	0.538376	1.14846	0.280081	0.286193	0.280773	0.698685	0.437739	0.182442	1.62224
ACH-001164	CCLFPEDS0003T	CCLFPEDS0003T_SOFT_TISSUE	1.07867	0.267082	1.14158	0.709654	0.693978	1.11315	0.246344	0.987069	1.11177	1.59293	0.431491	0.920971	0.651358	0.908248	1.98556	1.08314	1.26411	1.30725	0.878813	1.56183	0.712082	1.72184	0.839436	1.55941	1.35067	0.796869	0.673547	1.37683	0.965006	1.04683	1.33619	0.435964	2.21573	0.173438	0.445329	0.789057	1.35473	1.94884	1.07393	1.45414	1.73299	0.764221	0.565835	0.865357	0.950143	0.300121	1.77587
ACH-001172	R256	R256_CENTRAL_NERVOUS_SYSTEM	2.09859	1.81738	1.13881	1.85368	1.43284	1.63538	4.14493	2.36193	3.06022	1.7338	1.86275	3.27489	1.03101	3.15566	1.26539	1.86415	0.968007	1.6271	1.82936	2.50858	0.857674	1.47249	1.72328	1.56459	1.51187	1.41872	1.42671	2.98965	1.60515	1.19412	1.57781	1.98106	2.68376	1.08279	1.6805	1.43681	2.62618	1.93575	2.99639	3.79683	5.1015	3.03328	2.41719	2.77133	3.6954	2.36305	1.45366
ACH-001173	R262	R262_CENTRAL_NERVOUS_SYSTEM	2.73081	2.27138	1.87019	3.17213	1.51507	4.24237	3.34463	3.49272	2.72769	1.87504	2.74794	3.60717	1.95706	3.33152	1.68796	2.33393	1.14812	3.09513	2.26172	2.89443	0.822543	2.48113	2.04955	2.19455	2.39604	2.66212	2.19419	1.84398	1.65483	1.54965	1.34646	2.13822	5.49812	1.59572	2.41899	1.63841	2.19584	2.07514	3.48157	3.09098	5.3167	4.40226	4.56435	4.20967	4.38559	2.79549	2.08754
ACH-001183	RT11284	RT11284_URINARY_TRACT	1.12655	0.660279	1.38649	0.993676	0.861727	0.657306	1.03696	1.65788	0.965146	0.926469	0.862116	1.43003	1.33725	1.21052	0.770223	1.93946	1.39121	1.31256	0.893018	1.53887	0.610949	1.39601	0.661073	1.58565	1.01203	1.26404	0.732848	1.25443	1.26485	0.820919	0.491649	2.23515	1.14182	0.965659	0.601932	1.19161	1.11533	1.68552	1.09025	1.12817	1.37758	1.58213	1.20433	2.06042	1.04576	0.655396	1.6591
ACH-001184	SCMCRM2	SCMCRM2_SOFT_TISSUE	0.853339	0.492011	0.790015	0.751708	1.08926	1.5324	0.681599	1.11987	0.422417	1.0926	0.198717	0.947807	0.782625	1.31104	0.410584	1.02449	0.711041	1.82085	0.537563	0.541944	0.672043	0.435185	0.590935	1.38203	0.601865	1.65119	1.01731	0.717498	1.10557	0.773585	0.618407	0.275515	0.805376	0.449848	0.668738	0.797654	0.227353	0.533295	0.27047	0.930618	0.529865	1.06342	0.409532	0.806281	0.921879	0.692215	0.75983
ACH-001192	SKNEP1	SKNEP1_BONE	0.564648	0.713066	1.08948	1.2199	0.252401	0.374532	0.848515	0.279874	0.377935	0.534992	0.377444	0.319243	0.827694	0.445489	0.148465	0.37187	0.130969	1.58326	0.425854	0.454136	0.252984	0.275056	0.24781	0.952104	0.468278	0.584415	0.560161	0.512676	0.337055	0.74167	0.332412	0.660581	0.757095	0.653409	0.782855	0.749238	0.253747	0.147194	0.348098	0.67522	0.569294	0.572758	0.473078	0.755652	0.822922	0.517698	0.530528
ACH-001194	SKRC31	SKRC31_KIDNEY	2.59763	1.10993	5.68947	1.65056	1.48065	3.26399	2.22095	3.09398	1.74236	1.81901	1.31785	0.456896	3.70928	0.971746	0.909577	4.92258	1.65187	4.56768	1.37469	1.59014	2.39874	1.50103	1.48376	3.63497	3.16454	1.25463	1.08901	1.3543	2.96851	2.05801	1.82211	2.71596	5.70519	2.66751	3.81421	0.546333	3.44027	1.9549	3.03799	1.2906	3.6453	3.82387	0.849912	2.74814	1.45932	2.11567	2.02163
ACH-001196	SMSCTR	SMSCTR_SOFT_TISSUE	0.737481	0.31827	0.562113	0.705031	0.538243	0.845033	0.809026	0.679823	0.366727	0.815803	0.160131	0.940392	0.850095	0.640622	0.362654	0.899577	0.549182	0.690694	0.846037	0.661366	0.482967	0.235103	0.768372	0.820475	0.727077	0.867596	0.644337	0.300512	1.56004	0.479035	0.611337	0.664439	0.670878	0.314648	0.953743	0.416082	0.93904	0.893063	0.600361	1.11357	1.74704	1.47587	0.448832	0.426216	1.17863	0.736233	0.822086
ACH-001197	SMZ1	SMZ1_HAEMATOPOIETIC_AND_LYMPHOID_TISSUE	0.142933	0.0596365	0.273483	0.0841865	0.150075	0.0433902	0.124114	0.15247	0.127638	0.154651	0.128167	0.127394	0.240181	0.145542	0.186082	0.0667052	0.113208	0.115423	0.101451	0.294967	0.0889923	0.147472	0.0845393	0.132721	0.126992	0.127156	0.104062	0.110229	0.137034	0.174044	0.115636	0.131384	0.18721	0.070191	0.132593	0.108426	0.0893833	0.183289	0.0850118	0.0456066	0.144701	0.133159	0.0811943	0.35151	0.207999	0.0709999	0.226612
ACH-001200	STM9101	STM9101_SOFT_TISSUE	1.73129	1.91862	2.64857	8.23682	1.23004	0.981984	0.329193	2.39756	1.27355	1.40215	2.33007	2.32745	1.74897	2.89087	1.97621	2.13193	2.13191	2.17266	1.58641	2.51092	1.39001	3.10436	1.24606	1.67493	1.59933	1.82183	3.90603	0.580059	1.71171	2.52231	1.98449	3.57595	0.622597	1.42855	2.03356	1.4282	0.941145	1.32655	1.27068	0.591461	1.17738	1.00397	2.75749	1.54434	0.889322	1.4248	0.932055
ACH-001201	SUMB002	SUMB002_CENTRAL_NERVOUS_SYSTEM	0.858741	1.11025	0.590886	1.50755	0.481436	0.637344	1.54582	0.637653	0.731857	0.70427	0.51365	0.809143	0.617214	0.670345	1.1981	0.34052	0.297509	1.11595	0.626628	0.369776	0.283113	0.182174	0.449424	1.57028	0.802331	0.700343	0.433888	1.2413	0.459111	0.684769	0.921901	0.511216	1.57378	0.760488	0.735236	0.320411	0.318479	0.776457	1.00031	2.20615	0.773356	0.932122	0.555586	0.552188	1.57717	2.05116	0.222333
ACH-001207	TIG3TD	TIG3TD_FIBROBLAST	2.499	1.42681	2.62144	2.92139	1.72982	3.0449	2.39421	2.17048	3.06362	3.66875	1.6595	2.92031	2.81889	5.95314	2.66225	2.12846	2.05185	2.49458	2.2957	2.51504	3.31789	2.53279	2.20538	1.60589	1.69065	2.555	3.08628	1.74171	3.08653	2.06263	2.95379	2.01014	2.40168	2.06457	2.89963	1.91977	3.05748	3.7045	1.75067	2.51884	3.12795	1.55639	2.06656	2.27853	1.73928	2.53039	3.87072
ACH-001210	TTC1240	TTC1240_SOFT_TISSUE	1.42939	1.39455	1.39959	0.89556	1.40102	0.690338	0.620779	1.54454	1.35908	0.874803	1.86926	2.76168	1.37901	1.64293	1.33773	1.01713	0.919262	5.98748	0.825523	1.34713	2.58044	0.828103	0.779328	1.17372	0.623652	1.55135	1.9901	1.09491	0.492683	4.95185	1.08593	1.86032	0.8206	0.84144	0.478363	1.148	1.15616	1.74619	2.21176	1.09724	0.930731	1.01443	0.973626	1.50547	0.554495	0.998966	2.24951
ACH-001211	TTC549	TTC549_SOFT_TISSUE	1.64968	1.20203	2.40982	0.675538	1.48733	1.76677	1.8944	2.76048	2.21229	1.41045	1.35958	1.40019	2.02864	3.34957	1.71856	3.90149	2.68707	0.519506	1.79178	2.4767	2.18618	3.08465	1.39734	2.30637	0.901398	1.98613	1.38489	0.789277	0.924293	2.07894	0.677845	1.7752	1.62419	1.35098	1.56728	1.24737	0.929321	2.15318	1.40257	0.674506	1.19368	1.64877	0.842511	1.47017	1.47805	1.20271	2.16707
ACH-001212	TTC642	TTC642_SOFT_TISSUE	1.75044	1.30759	1.90814	1.62612	1.24103	1.32234	2.11976	4.88453	2.11842	1.39173	1.01136	0.466208	0.941719	1.55044	0.786231	1.20668	3.3134	0.99197	2.12949	1.91931	8.07322	3.5058	1.02804	1.41448	1.44472	0.603673	2.9749	1.30915	1.75916	1.35385	1.40418	0.800984	2.51501	1.9537	1.48985	3.00515	2.3185	2.67949	0.844174	1.29236	2.44859	1.6692	0.966815	1.46098	1.02375	3.03261	1.13595
ACH-001228	UPCISCC152	UPCISCC152_UPPER_AERODIGESTIVE_TRACT	2.38877	0.840472	4.16127	3.21142	3.39113	3.24312	1.09404	3.1696	2.23893	1.60229	2.92947	2.18359	2.0591	4.80851	2.71577	2.33019	2.61652	2.85505	1.98991	3.63913	0.987281	1.85049	1.63094	1.48826	1.15836	2.06867	1.36194	2.04975	1.44442	1.81345	2.08297	2.94657	1.8492	1.25526	2.38371	3.01412	1.75706	1.21723	3.8538	2.28822	1.06243	1.67924	1.29184	2.42419	2.18654	0.495443	2.34154
ACH-001229	UPCISCC154	UPCISCC154_UPPER_AERODIGESTIVE_TRACT	1.56012	1.48403	2.23506	1.44203	1.17294	1.49638	1.99863	1.70312	1.92902	0.899953	0.857827	1.21593	1.31592	1.64633	0.942841	2.4575	1.60265	1.09525	1.44281	1.75743	1.33362	2.07052	1.11039	1.73529	0.698864	2.04894	2.51029	1.46135	1.2419	1.28608	1.4818	1.83481	1.4548	3.20353	1.49166	2.2487	1.02794	1.00184	1.20393	1.56248	0.927769	1.88781	1.3028	1.21213	1.64137	1.28465	1.1093
ACH-001232	UW228	UW228_CENTRAL_NERVOUS_SYSTEM	4.70401	3.88199	7.23594	5.01127	4.97452	8.62207	5.15916	5.44518	7.93746	2.82064	1.12882	5.8538	6.18098	3.5464	5.19337	6.71319	1.8757	4.65216	3.11018	6.70334	2.94594	6.2575	5.56439	5.09734	2.01286	3.2735	4.75577	4.94589	5.34849	2.50973	1.87957	4.66859	4.07412	3.04304	5.17973	1.86507	4.15078	2.97618	3.77126	6.52927	4.49116	7.92044	6.20644	3.88763	1.7025	2.87938	2.49415
ACH-001239	WM2664	WM2664_SKIN	3.17026	3.25411	2.33834	3.74432	3.32889	3.49662	1.12247	2.866	2.63439	4.07131	2.61283	5.69414	2.09316	3.75343	1.47198	2.22445	9.25629	1.95138	3.07633	3.70709	2.86735	3.53739	3.55966	1.73218	3.58745	5.06114	2.61843	1.21975	5.24574	1.23087	1.39846	2.84252	5.60507	2.54235	1.77608	2.84494	4.64932	3.50383	3.48753	2.74962	3.55075	2.07031	2.66246	1.77433	2.54658	1.86752	5.00021
ACH-001270	127399	127399_SOFT_TISSUE	2.95265	1.35205	3.26034	1.99945	2.4369	1.93295	3.69022	2.40842	2.62822	2.3206	2.86077	2.66177	3.5532	3.42737	3.14601	2.51382	3.672	3.41913	3.95523	6.6775	3.67449	2.57435	2.55669	3.25807	1.92976	2.7036	2.33923	2.42349	2.62662	2.31435	2.27823	3.39669	3.86932	1.47935	2.25359	2.46336	2.42071	1.69245	2.40147	5.44952	3.95833	5.17953	3.07684	2.4038	6.20378	3.44558	3.03765
ACH-001275	SYO1	SYO1_SOFT_TISSUE	2.11572	1.92462	3.67306	2.52184	1.34949	1.95322	1.24382	1.62497	3.71646	1.93661	1.71298	1.82725	1.85697	2.52781	2.37934	0.810775	0.787388	1.89368	2.11334	6.0429	2.69463	2.15836	1.50096	1.67983	1.28348	1.99609	2.92561	2.41552	1.68328	4.80394	2.35797	1.83229	1.74494	0.729139	1.84338	2.24928	1.5432	1.04562	4.4309	2.29082	5.09099	1.56744	2.61192	2.32367	1.77726	0.719843	1.92378
ACH-001277	YAMATO	YAMATO_SOFT_TISSUE	1.63641	2.45999	2.07528	0.890057	1.60666	1.39016	1.53807	1.95004	1.1728	1.26573	1.30307	0.674702	1.00506	1.20401	2.28702	0.837455	0.545566	1.61545	1.62889	1.77173	1.49929	1.96583	0.839312	1.76386	0.33294	0.956264	1.55457	2.83769	1.16811	1.19196	1.26947	0.981025	1.79098	0.64051	1.843	2.0847	1.4598	0.804613	2.42921	2.6385	2.69303	1.31664	1.42734	2.0487	1.7281	0.473659	2.08616
ACH-001278	BIN67	BIN67_OVARY	5.06944	2.22204	7.80244	8.08834	5.53326	3.16951	1.28071	4.68318	6.78146	7.18665	8.58755	8.13199	5.74253	4.90381	2.68066	2.12665	3.49442	7.57241	4.01028	3.17568	2.43916	3.53816	3.79847	2.13039	2.63823	5.20399	5.45456	1.41265	6.39951	8.03482	5.92265	4.95935	9.5256	2.41117	3.85527	3.96333	6.36738	5.79375	5.35055	4.08061	4.8341	3.32091	2.63654	3.35729	1.39237	6.41203	8.41005
ACH-001279	SCCOHT1	SCCOHT1_OVARY	1.80944	1.55675	2.42299	2.18495	1.0797	1.30198	2.52501	3.0341	2.26202	2.49618	1.31439	1.91111	1.71764	2.43984	0.841085	1.38982	1.88572	1.89571	2.82378	1.56462	2.05954	1.75829	1.86606	1.88167	1.36659	1.91025	2.37561	1.08439	2.63355	1.56998	0.984279	3.32236	1.67929	1.71323	1.8213	1.98487	1.14692	1.61929	1.24594	2.90587	3.17092	2.22876	1.71744	2.55893	1.24585	0.905636	1.70515
ACH-001280	SCS214	SCS214_SOFT_TISSUE	2.39688	1.63163	4.72617	2.62118	1.82626	3.29753	3.50191	1.83283	2.59669	3.25205	0.784108	1.55003	5.15602	3.80191	4.72916	2.05564	0.870039	4.14311	1.67427	3.27016	0.541887	1.62865	1.70724	2.25231	0.716781	2.82286	1.02442	1.43297	1.58587	2.39376	1.93449	7.38392	2.61334	0.658051	2.05221	1.9495	1.58669	0.929976	7.23819	4.08679	3.14396	4.26928	3.15861	2.55809	4.10782	0.784042	1.99693
ACH-001283	TC106	TC106_BONE	0.753142	0.781168	0.921959	1.21947	0.615035	0.32306	1.51788	0.745564	1.10137	0.794252	0.348164	0.557677	0.782173	0.908371	0.603554	0.443579	0.416226	1.0176	0.906245	0.665883	0.375511	0.789353	0.496027	1.42284	0.449552	1.10284	0.565393	2.15291	0.509228	0.286443	0.556625	0.687342	0.610684	0.960555	0.554815	0.503856	0.37751	0.281492	0.506249	1.18542	0.308036	0.762733	0.719786	0.472103	1.84632	0.620369	0.748503
ACH-001289	COGAR359	COGAR359_SOFT_TISSUE	2.04239	1.47693	3.01306	0.673893	1.5382	1.06262	1.99389	1.71046	2.12363	1.8655	0.981123	4.36901	1.43244	1.70128	1.35811	1.75153	1.92178	1.22579	2.81277	0.469043	2.23503	1.48651	1.51308	1.64565	1.35926	2.41129	1.01572	1.46514	1.94569	3.48053	1.19482	1.29988	2.97875	1.59973	0.986897	1.45182	1.4625	2.50003	1.03627	3.79306	2.82046	2.10245	1.43009	1.67833	1.88141	0.459221	2.94274
ACH-001295	Y79	Y79_AUTONOMIC_GANGLIA	0.425614	0.380309	0.35052	0.322545	0.594376	0.436008	0.55044	0.620726	0.351204	0.451111	0.104127	0.669417	0.547021	0.294552	0.956012	0.75075	0.407509	0.678047	0.392387	0.262093	0.726488	0.180644	0.312389	1.47268	0.443403	0.512687	0.0637378	0.850793	0.184624	0.436825	0.7658	0.152198	0.292249	0.64991	0.276314	0.373112	0.121575	0.149577	0.416543	0.405906	0.345947	0.421005	1.00603	0.25844	0.552578	0.159072	0.223841
ACH-001300	CHLA15	CHLA15_AUTONOMIC_GANGLIA	0.849103	1.05527	0.477232	0.579377	1.06383	0.547223	1.11511	1.04317	0.68254	0.560927	0.933962	0.563039	0.647403	1.14845	1.2417	0.972387	0.875045	0.559898	0.758871	1.03236	1.08106	1.29069	0.620899	0.420398	0.781923	0.476312	0.662709	0.717972	0.775914	0.718454	0.83225	0.75191	1.07569	0.668461	0.495589	0.449304	0.552531	0.985472	0.518042	1.182	1.14497	0.90421	0.576733	1.16534	1.09124	0.927816	1.48632
ACH-001301	COGN278	COGN278_AUTONOMIC_GANGLIA	0.817172	0.727121	0.776918	0.743313	1.40187	0.557352	1.26599	0.811129	0.704371	0.756124	0.561967	0.999743	0.916645	1.51331	1.44182	1.30242	0.261084	0.775281	0.569849	0.692038	1.24732	0.834562	0.934101	0.509848	0.466895	0.693318	0.458175	0.935811	0.678203	0.81273	0.866147	0.59917	1.14259	0.797066	0.476504	0.288199	0.913448	0.998605	0.707142	0.852684	1.30623	0.73292	0.550479	1.00266	0.481482	0.490081	0.749406
ACH-001302	COGN305	COGN305_AUTONOMIC_GANGLIA	0.909214	1.06955	0.71213	0.437389	1.16681	0.904408	0.734717	1.33303	0.478793	0.774362	0.62732	0.722292	0.927396	0.947348	0.775789	0.756804	0.521553	0.847955	0.80605	0.729296	0.834748	0.691995	0.705844	0.729889	0.656817	1.44776	0.256234	0.642578	0.887994	0.469465	0.683196	0.457989	1.88984	0.707423	0.336179	0.59752	1.13535	0.568282	1.12084	0.995798	1.41468	1.4255	1.04383	0.807639	0.496188	0.505443	0.890955
ACH-001303	NB1643	NB1643_AUTONOMIC_GANGLIA	0.686149	0.743113	0.488468	0.734274	1.15354	0.356317	0.917378	0.961061	0.535766	0.340638	0.845291	0.47025	0.591611	1.06697	1.04933	1.06096	0.392084	0.62036	0.75528	0.931831	1.00438	0.793854	0.633243	0.256445	0.533375	0.264211	0.524508	0.6136	0.646892	0.370126	0.684788	0.783505	0.621201	0.941313	0.617656	0.199156	0.510029	0.854119	0.533381	0.383003	1.28034	0.69183	0.579632	1.26136	0.22638	0.557409	0.947858
ACH-001310	HA1E	HA1E_KIDNEY	2.94003	2.88546	4.159	2.11251	1.59839	2.21968	3.54809	2.56235	1.53695	2.89339	2.86182	1.70934	2.2249	2.34615	1.76145	1.24219	2.54093	2.59124	2.35402	3.61598	2.21755	2.31274	3.02462	2.82463	2.36626	2.28653	3.27037	2.06178	2.52134	0.878806	1.34096	4.56737	3.74468	2.57755	4.06592	1.12176	4.50834	8.08031	1.52441	2.6949	2.90936	2.06046	3.2601	3.6627	2.66523	1.09727	3.05487
ACH-001316			2.28653	2.01241	2.79941	2.94717	3.26127	3.97266	1.67186	4.63198	1.91394	1.86125	2.06482	2.54416	1.35639	3.69677	3.46304	3.78043	3.67851	3.16135	4.08076	1.37066	2.44319	2.57282	1.06001	2.38382	1.41674	1.03843	1.41425	1.73547	1.71952	3.24308	3.18749	3.84793	1.68421	1.11566	1.36555	1.47707	1.26048	3.50344	1.15581	1.47127	1.45734	3.64685	1.24633	4.38342	2.10472	1.04952	2.06397
ACH-001318	PLCPRF5	PLCPRF5_LIVER	2.74217	2.87695	1.71888	1.85868	1.80453	1.52089	4.46485	2.74307	2.7798	2.63293	2.78979	6.47892	6.02162	2.71497	3.76231	3.39611	0.682695	1.22835	2.21882	1.91091	2.24594	2.64699	4.03322	4.69206	1.75397	4.76404	2.0367	2.70651	2.80747	2.557	2.32916	5.37462	2.72014	2.97643	1.09801	1.08505	2.58851	1.5448	4.71258	2.18884	1.84596	3.02418	7.89899	2.69416	3.25402	1.35459	1.78812
ACH-001321	TT	TT_THYROID	2.68583	2.94076	2.26571	1.84044	1.25729	2.59162	5.36196	2.39516	2.99168	3.19037	2.40836	2.17544	2.82871	1.42179	2.32959	0.791488	0.832752	0.740754	1.16534	1.21855	0.687786	1.74761	2.08433	1.83327	2.95294	2.79852	1.49459	1.48062	2.77893	1.15917	3.49353	3.09807	6.2038	2.84303	2.7624	0.825448	3.19345	1.84803	4.05393	4.01553	1.35001	3.62599	2.56243	1.2157	1.1205	1.84839	3.54467
ACH-001322	CME1	CME1_SOFT_TISSUE	1.1426	0.695784	1.13357	0.584164	2.32403	1.6628	1.01874	1.15738	1.10835	0.99035	0.832984	1.97328	2.6293	1.29136	1.56271	3.23936	1.14026	0.683809	1.16576	1.28926	1.06876	1.08573	1.03395	0.925735	0.52855	1.44805	0.687247	1.10555	0.513333	0.924321	0.776406	1.43134	1.11743	0.557462	0.811316	0.517055	1.34266	0.68022	2.0873	0.655008	2.0708	1.54755	3.3571	1.45214	1.32373	0.148925	0.638187
ACH-001329	ANGMCSS	ANGMCSS_CENTRAL_NERVOUS_SYSTEM	3.71751	3.13201	5.17804	3.29528	6.75346	5.25149	4.04224	3.26027	2.72041	3.96088	1.63024	3.23048	4.1545	5.09158	2.55865	3.76227	3.24781	4.27332	3.20489	3.43366	1.16172	3.98161	3.49801	2.76694	2.42747	4.18566	2.91806	2.03776	3.5399	4.18366	1.8291	3.18072	5.79756	1.36161	3.62854	4.06941	5.22926	2.59162	4.10603	4.28902	5.12432	4.20597	3.6532	2.50876	7.42213	7.31977	2.99836
ACH-001335	C4II	C4II_CERVIX	4.5346	3.7381	4.91039	7.76791	3.85728	3.83253	3.82913	5.93282	6.09295	3.8247	3.94927	7.24841	2.37743	3.40121	3.89496	2.80763	4.70516	9.65125	8.39213	4.12053	1.11241	8.99115	2.38793	3.43342	3.20288	5.27111	5.89583	5.58335	5.43173	8.08885	4.18263	2.1829	5.04528	7.44492	3.83395	5.70648	5.12149	1.78188	3.59032	7.07861	3.55662	5.05378	3.0532	2.84258	8.41533	6.91321	1.63041
ACH-001339	COLO794	COLO794_SKIN	2.28162	2.73364	2.91183	2.8301	1.88755	1.96842	2.80602	3.10465	1.95376	2.06587	2.809	2.09779	2.33662	2.16759	3.59033	1.44228	0.911852	1.43992	1.97378	3.3679	2.49585	1.86046	1.80709	1.38811	1.91582	2.05134	2.11987	1.61144	2.09324	1.03549	1.85682	2.49778	3.15949	1.36744	2.28829	1.00652	1.39449	2.24003	2.23141	3.39011	3.54245	1.8492	2.65321	2.75111	2.49836	2.51601	2.89889
ACH-001340	COV413A	COV413A_OVARY	5.29605	2.92063	6.84585	9.88232	4.656	3.7212	4.53973	4.15659	1.72141	4.90482	3.11526	3.64062	10.6801	3.6284	13.8134	2.08454	4.90234	4.4524	3.13839	2.87548	3.60902	5.65283	5.04708	3.38815	3.37047	6.62523	3.66367	3.87738	2.89535	3.46748	3.85652	5.48048	17.7495	3.10895	2.92794	4.12412	3.7298	3.76308	4.72344	7.90236	4.16215	7.7086	4.01996	3.0927	6.44854	3.2419	4.88491
ACH-001346	H103	H103_UPPER_AERODIGESTIVE_TRACT	1.73485	2.30208	1.95599	2.76775	0.944315	1.86835	1.45025	1.43313	0.798986	1.18176	1.87539	0.729983	1.30393	1.70803	1.11754	3.16291	2.53646	2.19969	2.05201	0.978962	0.895583	1.16994	1.44133	1.54137	1.27332	0.548693	2.1108	1.01473	1.70678	1.52416	1.15983	1.99617	1.26114	2.39485	2.10961	1.3438	1.62323	1.1318	1.07716	2.22412	2.00288	1.64808	0.991149	1.66209	4.37477	1.23898	1.46603
ACH-001347	H157	H157_UPPER_AERODIGESTIVE_TRACT	3.64277	1.37159	4.05579	2.99276	2.25536	3.48581	3.99973	5.00367	3.01729	1.45546	1.80105	2.58639	5.30242	7.74674	1.84836	3.16246	4.98471	1.94255	2.79299	2.02819	1.10578	2.07242	2.96715	2.10929	1.92497	3.07647	4.02743	1.10041	4.00236	4.38032	3.27375	5.25586	6.11799	2.44626	3.4745	2.18847	1.51642	1.36278	1.84596	1.93357	3.70399	9.28209	6.494	3.49609	5.13362	8.33093	5.09616
ACH-001353	JOPACA1	JOPACA1_PANCREAS	3.16736	2.62445	2.8783	1.39756	1.5592	2.67821	7.02662	3.27202	4.14768	4.47143	1.9583	1.41641	7.56245	2.11913	3.95263	2.48086	1.28072	2.04374	2.39925	3.7959	3.90447	2.01566	1.79877	3.31981	3.74375	4.7634	2.83836	4.62784	3.31127	3.29127	3.25152	2.37314	4.70307	4.76864	1.43657	2.33531	5.6232	1.985	3.45046	2.81573	3.98694	4.23152	2.52924	3.724	1.31426	9.56442	2.70294
ACH-001354	LAN2	LAN2_AUTONOMIC_GANGLIA	0.478246	0.487133	0.390437	0.222856	0.510796	0.524392	0.669776	0.48548	0.463518	0.357573	0.286972	0.75893	0.709189	0.715724	0.711872	0.39345	0.336747	0.542355	0.504838	0.269851	0.239026	0.663413	0.171304	0.133488	0.427789	0.290659	0.300404	0.361685	0.355145	0.903198	0.465366	0.319102	0.339209	0.276436	0.266908	0.334243	0.321283	0.480736	0.204823	0.738868	0.349968	0.680494	0.600051	0.773161	0.462247	0.423962	0.474347
ACH-001356	MB1	MB1_THYROID	2.67475	2.41938	1.64121	2.41542	2.19991	3.81742	3.36583	1.53946	2.47238	2.58504	2.07164	1.50725	2.15838	2.78747	3.56722	3.7446	2.76319	2.53481	1.47849	1.10299	1.63328	1.25264	2.93274	0.591073	2.42072	0.881765	1.53887	2.85489	1.73905	2.30166	2.97335	3.64499	2.93638	2.86713	2.41581	1.57008	2.3909	1.18954	2.85101	2.68457	2.87794	3.30421	0.956186	3.34219	3.91913	3.76375	3.63399
ACH-001366	NGP	NGP_AUTONOMIC_GANGLIA	0.425268	0.409987	0.0894976	0.319461	0.54686	0.524558	0.300781	0.284827	0.358584	0.318603	0.147481	0.393058	0.47901	0.471346	0.212715	0.822707	0.259668	0.599969	0.167358	0.19706	0.289888	0.174052	0.218188	0.363743	0.21201	0.29314	0.307417	0.720876	0.217181	0.476585	0.538173	0.280176	0.722657	1.25645	0.0967704	0.193005	0.509671	0.330252	0.457243	0.593192	0.559187	0.271465	0.121667	0.334536	0.369547	0.734217	0.496636
ACH-001367	NMB	NMB_AUTONOMIC_GANGLIA	0.693688	0.966501	0.42482	0.310372	0.935886	0.589478	0.803665	0.543312	0.317661	0.255154	0.575817	0.800419	0.527344	1.05672	0.660357	1.20119	0.516889	0.921493	0.769622	0.537267	0.804894	0.430584	0.607185	0.12875	0.505485	0.314469	0.402955	0.567355	0.670202	0.410804	0.720745	0.469191	0.831085	1.08971	0.398295	0.124292	0.650024	1.02653	0.500231	0.928622	0.890747	0.61806	1.44495	1.25736	0.647436	0.400526	0.742438
ACH-001369	OCIC5X	OCIC5X_OVARY	2.20817	2.82172	2.88676	2.17482	1.19473	1.10597	1.81194	2.23354	1.441	0.554088	4.0729	1.89598	2.0859	1.71371	1.75537	1.64394	1.52501	2.33879	3.19529	3.26041	3.32768	4.48418	2.01006	2.61985	2.20187	2.23691	2.28022	2.10044	2.40953	2.48406	1.1517	2.75989	0.820762	3.09671	2.58399	1.30876	1.53389	2.08431	1.04524	2.74426	2.02084	2.42786	2.32142	6.63242	2.74346	1.02908	2.0607
ACH-001370	OCIP5X	OCIP5X_OVARY	0.846424	0.347743	0.522728	0.396869	0.939454	0.894015	0.601526	0.804562	0.63401	0.772917	0.227756	0.247746	0.502863	0.89369	0.892944	1.11546	0.739597	0.366979	0.661362	1.51265	0.785052	0.725938	0.579922	0.84309	0.895718	0.830881	1.73771	0.338992	0.66795	0.741787	0.261914	0.327524	0.506107	0.94631	1.29378	2.01737	1.05345	0.957282	0.887288	0.460595	0.858663	0.997887	0.419251	1.22869	1.11347	0.560064	1.43271
ACH-001375	PACADD119	PACADD119_PANCREAS	2.19149	0.869392	2.13676	2.99353	2.98589	2.26564	2.42615	3.46418	3.56837	1.62031	1.27632	2.66626	1.74511	1.53298	1.10387	2.81119	1.89382	2.64028	3.6803	1.77768	3.20535	1.96262	2.56158	0.781164	0.730869	1.61156	2.12405	1.7807	2.87196	2.67821	2.57358	1.85336	2.42612	3.32773	2.57594	1.17884	1.87423	2.39645	1.27071	2.60032	1.97038	2.16942	1.03059	1.27196	0.889385	0.616867	1.87697
ACH-001376	PACADD135	PACADD135_PANCREAS	2.14619	1.10166	1.16049	1.03054	2.93716	2.10939	1.52447	1.472	1.42992	2.33487	1.23391	2.30565	1.97882	1.27547	2.82202	2.87934	1.78978	2.62245	1.96178	3.19644	2.85546	1.82425	1.15684	2.54637	2.79965	3.61468	2.19206	3.01771	0.813544	2.48251	1.63103	1.37698	2.10591	2.41676	1.85475	1.69273	6.90613	1.95602	0.881362	1.58109	3.77665	6.23068	0.883873	2.53536	2.89925	2.01274	1.6734
ACH-001377	PACADD137	PACADD137_PANCREAS	3.2738	2.99037	2.82658	2.37298	2.87343	1.99432	4.36793	1.42778	6.47712	2.99032	2.79708	5.20701	4.5525	2.93093	4.75875	2.24288	2.6403	1.43698	4.35283	4.80078	2.97571	3.27143	3.15429	1.94461	3.27047	2.55914	2.73007	3.55291	2.60567	4.1637	5.64217	5.87567	3.64751	3.64913	2.16501	2.03737	2.77619	4.90862	1.50515	2.50671	6.2579	3.09826	1.45071	1.92982	4.61586	3.13912	2.40142
ACH-001378	PACADD159	PACADD159_PANCREAS	1.75384	0.837862	0.933426	0.502936	1.41672	2.46808	1.83397	1.43373	1.82373	1.39541	1.18775	0.904881	0.864307	2.04153	1.44887	1.75612	1.26085	1.31857	1.90319	1.21323	3.26738	0.921632	1.2596	2.80215	2.24906	2.27846	1.94987	2.02533	2.13223	1.40697	2.15216	1.49779	1.58286	2.62341	1.27278	1.00131	3.72305	1.47216	1.77784	1.43466	1.92171	2.04223	1.28514	2.04151	2.07061	1.7063	1.99519
ACH-001379	PACADD161	PACADD161_PANCREAS	2.17943	1.99855	3.05452	4.11267	2.71948	1.51621	2.73691	2.0509	1.57706	2.87859	2.16096	2.87875	1.53428	1.26394	2.7007	2.40454	3.29072	3.99093	2.1706	1.14486	2.71859	2.54811	2.28686	1.01008	1.32246	1.85224	1.79223	4.26824	1.50284	3.43438	3.63098	1.52766	2.92634	2.90097	1.45655	2.51257	1.47084	1.81262	1.44918	3.20573	3.32197	2.62525	1.46428	4.19558	1.57128	1.76414	1.53849
ACH-001380	PACADD165	PACADD165_PANCREAS	3.06489	2.35262	2.5458	3.79491	2.69774	2.66279	5.11777	4.02247	3.19841	2.30741	1.86434	3.04977	2.66003	1.67473	3.47115	3.8458	3.12731	3.47833	3.05584	3.54641	2.09549	2.22912	3.84115	2.39741	3.17418	1.71288	2.63249	5.18899	1.71409	4.94896	3.17829	2.86686	5.70206	1.89344	2.55131	0.808256	2.85975	3.94756	2.27099	4.1071	1.96814	2.44124	1.59832	2.79612	6.79991	1.71573	2.67173
ACH-001382	PACADD188	PACADD188_PANCREAS	2.92342	1.14227	2.09936	2.39246	4.71936	3.7251	2.37608	2.02644	4.26125	3.50763	2.65269	3.79873	0.772315	2.25021	7.66703	2.36977	2.5406	4.16987	4.00748	2.63503	2.07504	2.20828	1.61898	1.25576	3.47878	2.13084	4.03055	3.08158	1.88525	4.35715	3.87868	1.05207	3.211	2.95249	3.37212	2.33005	3.00851	4.28994	1.04809	2.07175	9.01565	3.88242	0.675337	4.85551	4.813	1.90998	3.52708
ACH-001386	SCLC22H	SCLC22H_LUNG	1.1261	1.43586	1.34535	2.01977	0.780602	0.302136	1.48678	1.26986	1.96998	0.252003	0.316647	0.458997	0.709109	0.549533	1.58259	0.369822	0.68875	1.45018	0.725158	0.580273	0.369777	1.34621	0.571279	0.753871	0.926821	0.446441	0.624786	0.940011	0.995178	0.919189	1.13455	1.56021	2.25482	1.0519	1.53279	0.361049	0.686129	1.22179	1.06629	2.56033	1.55864	0.558756	0.380368	0.927738	2.03709	0.4363	0.837517
ACH-001388	SUM102PT	SUM102PT_BREAST	0.977232	0.408519	0.815539	1.19697	0.592365	1.25049	0.525988	0.82323	1.27423	0.708812	0.502963	0.576203	0.882988	2.25226	1.44632	0.681217	0.740125	0.57826	1.25708	1.25082	0.528957	0.860148	0.282808	0.667786	1.19274	0.803467	1.55637	0.17093	1.03243	3.56687	1.25251	0.336679	0.489547	0.719493	0.540481	0.325882	0.682971	0.485024	0.258376	0.59437	0.944603	1.92093	0.603233	0.883589	1.48072	0.807041	1.68452
ACH-001389	SUM1315MO2	SUM1315MO2_BREAST	1.5484	2.16733	1.29833	1.69343	2.86161	1.34481	1.72196	2.0208	1.35402	0.961459	0.697101	2.03796	1.67832	0.929895	2.5587	0.971578	0.970325	2.61218	0.983485	0.927849	1.89391	1.40919	1.86686	1.41795	0.61334	2.90573	1.29993	2.03587	0.910216	0.967519	0.696106	1.75766	1.68737	1.59015	1.12669	2.30537	1.26267	1.38945	2.00658	1.74826	1.89293	0.709016	1.84668	1.61166	0.931918	0.820807	0.979485
ACH-001390	SUM149PT	SUM149PT_BREAST	1.23854	0.699305	1.54966	1.33454	0.80616	0.973535	1.23959	1.28234	1.11772	0.751042	0.392932	0.343322	0.617445	1.45103	1.98531	0.85554	1.38679	0.719476	0.889916	1.05442	1.60792	0.711704	0.622223	1.11021	0.755919	1.02025	1.14174	0.614566	2.0744	0.93218	0.802926	0.567887	1.11606	0.826945	0.777925	1.99639	1.54166	0.669058	1.03908	1.53942	1.75921	1.63812	0.926135	0.595665	1.27586	0.940698	1.70147
ACH-001391	SUM159PT	SUM159PT_BREAST	1.8816	1.01222	2.06506	1.04393	1.73274	1.26879	2.54996	3.62328	2.04505	1.69873	0.395022	2.08831	0.954208	1.72762	1.95227	2.51344	2.09869	0.931218	2.23308	2.26738	0.816318	5.84723	3.00486	2.15	0.733804	1.94642	1.55617	0.77983	3.28288	0.651793	1.05579	1.49879	1.43141	0.832754	1.1648	3.51808	2.18183	0.853909	1.89046	2.41129	2.08042	5.1778	1.27597	2.45944	1.62965	0.786929	1.66505
ACH-001392	SUM185PE	SUM185PE_BREAST	2.06726	0.987223	1.91947	2.02468	1.7351	3.72139	2.33008	2.25955	1.4521	2.29847	0.944481	0.817933	3.47828	1.38516	2.86065	1.79345	3.27261	1.56512	2.7235	2.64589	1.19523	1.10222	1.87003	3.25642	2.13744	4.23025	1.42498	2.60879	2.82837	1.33748	2.12921	2.39542	1.57885	1.45174	2.41447	1.3094	3.85066	2.34231	1.16106	2.11081	1.34846	1.92039	1.45527	2.08192	3.07401	0.856098	1.67448
ACH-001394	SUM229PE	SUM229PE_BREAST	1.65551	0.953051	2.73497	1.82393	0.927454	1.74532	2.11371	2.35892	1.91807	2.35951	0.90063	0.920363	0.476863	2.09532	1.96934	1.28633	1.30307	1.54699	1.78834	0.51479	0.577425	1.38629	0.540375	2.23668	1.08874	1.17101	1.40939	1.57801	2.27888	0.814916	2.41785	0.951637	2.07016	1.67762	1.46457	1.53947	1.01044	1.54906	0.781444	1.34723	2.21559	2.77316	0.83749	1.81283	1.10784	1.35202	1.90698
ACH-001395	SUM44PE	SUM44PE_BREAST	2.15964	1.16543	2.42056	1.36937	2.60487	5.84148	1.40439	2.71009	1.36833	1.40562	1.15807	0.941939	0.809246	2.11931	2.40688	3.42405	3.23038	1.31429	2.74602	3.50803	0.691106	1.99263	1.57968	3.09102	2.24839	1.96856	2.47181	2.167	1.28563	1.7585	1.18322	0.405427	2.31973	0.580898	1.75267	2.63599	3.02019	1.78223	1.18134	1.51886	2.2681	7.4917	2.79335	2.80751	3.94184	2.60449	1.74873
ACH-001396	SUM52PE	SUM52PE_BREAST	2.21176	2.03215	2.59746	2.15576	2.07034	3.4264	1.38769	5.06027	1.89769	1.87822	1.55864	1.3765	2.77865	2.01921	2.45632	3.78263	2.68331	1.66151	1.51016	3.21315	0.980633	2.6343	2.58332	3.55331	1.82679	1.96447	1.36148	1.4728	2.96528	1.62577	1.9619	2.61719	1.57274	1.90715	2.19033	1.12052	3.22278	2.65848	1.03923	2.72123	0.852151	1.47598	4.11784	5.22483	4.02473	0.367962	1.44525
ACH-001403	TO14	TO14_OVARY	4.06708	3.32099	4.88985	3.27963	3.21625	4.11574	6.00163	5.54734	5.03556	3.18853	2.23715	3.30882	9.53644	5.0871	2.82702	6.74572	2.10247	2.91013	3.18035	5.87192	2.55852	2.18428	4.86679	3.93328	3.19483	3.21513	2.03233	3.53076	4.1837	4.04235	2.77046	4.516	6.20434	4.50102	4.65475	1.87576	3.08496	3.55993	6.2838	2.92317	2.69288	3.51078	2.96984	3.0887	3.34693	3.80346	6.57848
ACH-001407	UMUC13	UMUC13_URINARY_TRACT	2.7487	1.79901	3.9692	1.4988	3.94291	1.90705	2.1766	3.77837	1.53349	3.3434	3.24148	4.26031	1.45933	6.819	4.03885	3.07278	5.44661	2.60076	1.46713	2.51338	1.25817	3.68595	3.39627	0.838394	3.62407	1.4387	2.2534	1.35174	2.67004	2.68572	1.39168	2.13706	1.80408	1.51198	1.91726	3.45722	0.847996	1.36496	4.01323	3.1433	2.37592	7.17529	2.59026	3.11373	6.0739	0.829189	2.60684
ACH-001408	UMUC14	UMUC14_URINARY_TRACT	1.90994	1.33082	3.72467	0.7621	1.09438	1.69294	2.2962	2.09722	1.11521	1.45403	1.13893	1.6008	3.52258	2.49317	2.34943	4.19971	2.90793	1.48151	1.65494	1.79037	1.41844	3.7204	1.91324	4.01958	1.03377	2.71621	0.769172	1.25198	1.27441	2.22597	1.16977	3.34049	2.05679	2.06811	1.96603	1.94786	0.802712	3.16988	1.7557	1.11226	1.20544	2.06107	1.52408	2.12123	1.71908	1.40782	1.29077
ACH-001409	UMUC16	UMUC16_URINARY_TRACT	2.78637	1.42965	5.05855	2.80679	1.94937	2.88995	2.49634	3.46463	1.45986	2.44086	1.67645	1.75433	3.2976	2.15986	5.05199	4.95553	4.24087	4.11047	3.00124	2.47811	1.4907	1.98391	2.43428	2.39511	2.76337	1.76628	0.830105	2.46188	2.57219	1.86044	3.46421	5.69818	4.81297	2.63757	3.06162	0.886917	3.39537	2.82062	2.5553	3.20761	2.78789	3.88527	1.36166	3.10487	3.47194	2.53772	2.87076
ACH-001410	UMUC4	UMUC4_URINARY_TRACT	2.54561	0.436085	5.92053	3.27303	1.87632	2.55246	1.23745	2.19349	3.28989	3.74588	4.08253	1.63852	0.793264	3.09262	3.31636	1.33906	1.26751	2.75395	2.89642	5.66084	1.23571	5.2756	0.826342	3.2652	2.15269	1.98906	2.9805	3.68148	1.33147	6.4839	3.55686	0.799653	1.77282	2.62582	1.81438	4.03921	2.59044	2.24475	2.66965	0.699146	2.50819	2.04869	0.60385	3.82151	3.35883	1.23241	2.35597
ACH-001411	UMUC5	UMUC5_URINARY_TRACT	1.45834	1.39171	2.07699	0.798948	3.0489	1.6281	1.45272	1.97629	1.22586	1.24018	1.73828	1.30563	1.90959	1.22778	2.00324	2.61871	2.3937	2.60134	1.05526	2.39178	1.09674	1.2936	1.0041	1.39937	0.828311	1.34675	1.65278	2.34749	0.748973	1.53186	1.96729	2.4396	0.683577	3.15118	1.45567	1.09424	0.540902	1.87675	1.46452	0.68796	0.151124	1.10428	0.577813	1.37394	1.00481	1.36978	1.36868
ACH-001412	UMUC10	UMUC10_URINARY_TRACT	2.30311	2.88788	2.32587	3.11609	2.08551	1.57107	1.96198	2.02224	1.92971	2.78828	1.25819	1.44551	1.41973	0.759838	2.70102	1.45423	1.74032	1.94358	0.474104	2.61217	4.61675	1.39195	1.7189	4.11829	2.34093	3.5914	1.62199	5.20537	1.6974	1.33926	1.42205	2.87213	2.39784	5.56931	0.794737	2.11337	2.36234	1.59491	1.73541	2.27221	1.09728	1.14675	3.49843	3.19781	0.814988	1.85859	1.20628
ACH-001413	UMUC11	UMUC11_URINARY_TRACT	1.95638	1.33128	1.36546	2.12854	2.50403	1.70016	1.63656	2.35067	1.28216	1.97145	1.71163	3.61737	1.03087	1.83249	2.28868	1.80644	1.82683	2.10103	1.276	0.811141	1.71049	1.93128	2.14664	0.891935	1.91009	1.31792	1.63366	1.70316	2.00798	2.74054	2.19716	1.55783	2.68937	2.23085	1.38382	1.72071	1.38232	2.27834	1.67523	1.28569	3.2609	2.27519	1.48658	1.86819	1.2505	1.24405	2.0033
ACH-001414	UMUC6	UMUC6_URINARY_TRACT	0.652856	0.660644	0.913021	0.673329	1.24877	0.764607	1.94227	0.755798	0.470032	0.381142	0.713645	0.796786	0.288058	0.703244	1.06411	1.20203	0.723289	0.536157	0.685074	0.434481	0.358105	0.729962	0.606438	0.468257	0.289663	0.792278	1.15568	0.744506	0.507605	0.892334	1.05364	0.528437	0.312187	0.901751	0.454404	1.21212	0.369141	0.264753	0.281358	0.606955	0.461968	1.11289	0.287495	0.897121	0.366341	0.605787	0.400487
ACH-001415	UMUC7	UMUC7_URINARY_TRACT	4.65483	4.10393	4.93617	8.30634	2.78653	3.66775	1.79707	5.28218	4.44111	4.393	3.17495	4.57386	3.89748	3.29535	2.50401	2.53877	3.39185	6.97469	3.12569	10.0101	2.49004	3.35521	4.52802	2.50273	4.68933	4.36038	5.94182	6.16693	4.17745	5.16478	2.33584	7.23868	5.82263	9.13327	3.47079	5.13635	5.22171	2.1556	5.56999	3.11052	7.47045	5.92521	2.42985	6.30519	4.76606	9.2314	5.64392
ACH-001416	UMUC9	UMUC9_URINARY_TRACT	3.9276	2.74132	4.93536	7.18014	1.62214	4.92089	3.41461	4.49648	2.39654	2.84885	2.99974	3.40108	2.08628	1.0797	1.78061	4.14664	3.53846	6.75737	2.64246	7.5954	1.6956	2.91673	2.11867	7.42306	2.67886	7.26683	2.58674	8.03708	3.66923	2.87444	4.73871	4.81616	7.64466	5.40804	2.25526	3.2886	4.84275	2.34606	3.99291	2.79959	3.79366	3.14175	3.07266	5.30803	3.01792	6.40428	3.61499
ACH-001419	VP229	VP229_BREAST	2.15609	1.5318	1.87953	3.37895	1.71486	1.59668	1.82613	1.91133	1.14901	1.37799	2.50975	1.68352	2.70318	1.96681	2.68861	3.44977	3.3447	1.92878	2.17262	4.57695	2.47108	1.61485	1.39238	4.44027	1.42672	2.57459	1.35276	5.58541	1.54952	3.61462	2.16563	2.21651	1.35138	1.63096	1.04555	5.42408	2.44323	2.4092	1.16152	2.79888	1.05645	3.51716	1.7777	2.20764	2.0659	1.3456	1.31291
ACH-001421	WERIRB1	WERIRB1_AUTONOMIC_GANGLIA	0.594844	0.87397	0.489487	0.158125	0.738479	0.254299	2.10511	0.790748	0.636211	0.652309	0.10031	0.443468	1.0111	0.337456	1.01863	0.669531	0.207957	0.861942	0.350047	0.0952049	0.323649	0.19453	0.188971	1.45936	0.38736	1.1501	0.117361	1.34681	0.524945	0.384349	0.585406	0.259116	0.610096	1.71008	0.299558	0.313097	0.558447	0.194532	0.573183	0.567621	0.178608	0.313757	0.919422	0.383538	0.753695	0.172561	0.10706
ACH-001422	WPE1NA22	WPE1NA22_PROSTATE	4.15817	5.0081	3.85684	7.93801	2.69871	3.23266	5.55347	4.50097	3.16803	4.90154	3.47354	2.79351	6.52378	2.83403	3.2319	3.75731	6.27157	7.5255	4.69633	2.7929	2.8783	3.92288	3.31333	2.54931	3.38831	3.31372	1.85419	2.75257	6.34202	4.30552	5.21291	6.63515	7.69754	5.07142	4.11209	1.28697	2.60058	1.58211	2.79942	7.45548	4.59265	3.58746	1.78465	5.37901	6.77863	5.01089	2.96864
ACH-001430	TC138	TC138_BONE	1.02217	1.52919	1.29606	1.37711	0.316761	0.391292	1.20238	0.597365	0.546723	1.09313	0.721718	0.648519	2.09888	0.593073	0.842741	0.448112	0.382207	0.928933	0.76278	0.86309	0.724092	0.248029	0.984531	2.41201	0.78334	1.2772	1.93828	1.10922	0.484443	0.485344	0.678723	0.915085	1.64533	1.38189	1.3132	0.594711	0.497192	0.142255	0.636501	1.32484	1.7111	1.52895	0.823698	1.32149	1.97972	0.933285	1.20397
ACH-001431	TC205	TC205_BONE	1.67817	0.689329	1.35594	2.20293	2.12378	1.13715	0.946806	1.76913	1.26694	1.4866	0.367797	1.93752	1.08989	2.76664	1.14549	0.792181	1.18638	1.79211	2.14398	1.67675	0.388154	0.93669	1.5333	1.29984	0.77067	1.89178	1.2808	1.5054	1.45459	2.50566	1.61915	0.923542	2.32479	0.957043	0.759998	2.2283	0.323782	1.28835	1.492	3.07901	1.73756	2.83058	1.12793	1.85494	2.8848	0.224196	3.56775
ACH-001433	CCLFPEDS0008T	CCLFPEDS0008T_SOFT_TISSUE	2.35583	2.03658	1.76413	1.12682	2.67978	1.62354	3.37193	2.9395	2.27412	1.51332	4.33368	3.13218	1.94612	2.29971	1.98576	3.19401	1.27739	1.85365	4.17011	2.39269	2.45239	2.33005	2.87008	1.66443	0.852022	1.53483	3.78369	1.80929	2.24332	2.64478	1.68804	2.57971	3.90579	1.26574	1.1131	1.93538	2.70728	3.78961	4.9948	3.64405	1.77109	3.90116	1.59968	3.30412	2.6036	3.1866	1.67629
ACH-001441	921	921_UVEA	1.39587	1.82335	1.42467	2.00421	0.918552	0.834134	2.81842	1.32605	1.72658	1.55966	1.47036	1.22877	1.03906	1.69247	1.54922	1.10368	0.831982	1.52175	1.94197	1.73707	0.767693	2.10765	0.889664	1.60525	0.997737	1.70038	1.58553	1.97676	1.34454	1.3384	1.517	1.36059	1.26054	0.941159	1.1831	0.429869	0.814602	1.04721	0.751734	2.33462	0.710705	1.46549	0.789467	1.20386	1.74243	1.25163	1.60472
ACH-001450	BLUE1	BLUE1_HAEMATOPOIETIC_AND_LYMPHOID_TISSUE	0.118999	0.252599	0.122528	0.0519697	0.226465	0.0962838	0.143298	0.137722	0.107488	0.0467069	0.0931605	0.153602	0.0770678	0.0724556	0.066247	0.12855	0.11354	0.039284	0.0717922	0.116262	0.171212	0.170664	0.161164	0.193147	0.111685	0.120344	0.0773593	0.0822312	0.148645	0.145532	0.0977642	0.0391763	0.0378198	0.0348742	0.0740744	0.0706459	0.1426	0.0680298	0.0586408	0.0632821	0.0344079	0.140735	0.0680407	0.27218	0.155541	0.0472129	0.0654248
ACH-001451	BOKU	BOKU_CERVIX	1.92618	1.84488	1.8734	1.50206	2.96042	2.1709	0.548909	1.48766	1.83514	0.908459	1.00651	1.70399	2.01659	0.936724	1.36282	2.21956	1.88048	4.84709	1.67667	3.00353	1.2784	1.49975	1.08511	1.8168	0.954057	2.32971	1.50054	1.9022	1.2075	2.43101	1.0504	1.44795	2.83524	1.85704	1.55585	3.90015	2.05661	2.57414	3.61134	2.78678	1.69223	2.21845	2.15343	0.933067	2.999	1.38846	1.20833
ACH-001454	C10	C10_LARGE_INTESTINE	6.49339	2.49243	6.48688	4.83616	8.73876	11.3975	5.44026	5.98773	8.74953	9.19587	1.94079	11.3416	4.19366	6.60833	7.87948	6.11783	6.60547	7.15609	5.61935	12.9051	2.67472	4.42944	11.269	11.5636	5.08648	5.73182	5.50997	12.5716	5.9832	8.15686	7.55727	3.66438	4.80689	9.53984	7.40308	3.63805	6.98472	2.53388	5.3467	12.0615	7.93369	7.60643	3.91915	5.8464	6.57189	9.27479	13.831
ACH-001456	C125PM	C125PM_LARGE_INTESTINE	2.61217	1.48113	3.48981	2.50331	0.731963	4.46982	2.13505	1.75705	2.89944	2.799	1.93637	1.79211	3.61921	1.43206	3.62772	1.10668	2.83108	1.3275	2.32386	5.761	1.20603	2.7193	1.42539	2.2909	1.85913	2.67287	2.32315	1.23422	1.88841	6.6868	2.19729	2.15674	2.98613	1.9446	1.50566	1.56956	3.33587	3.19953	1.576	0.882095	2.86802	3.502	0.830483	1.93765	2.64387	1.53072	1.97974
ACH-001458	C75	C75_LARGE_INTESTINE	2.00662	1.17073	2.73235	1.85952	0.624638	2.04277	1.91089	1.45505	1.9687	1.83758	0.853299	2.74618	1.34483	3.1407	1.04276	0.860837	1.21498	1.5246	2.04467	3.44293	1.06509	1.45838	1.2564	1.9189	2.12552	3.3142	2.66662	1.28346	2.6476	2.4178	2.82892	2.07407	1.90155	1.40849	0.98751	1.44517	2.72901	3.03221	1.37357	1.95315	4.71376	2.14103	0.705161	1.27747	1.5429	2.90799	1.64152
ACH-001459	C80	C80_LARGE_INTESTINE	2.25482	1.73954	2.13441	2.58236	1.25368	2.55202	2.03283	1.38696	1.50505	3.00523	2.1363	2.75986	1.41404	2.19179	2.65941	1.03997	1.5824	1.46499	2.64946	2.60051	1.43874	1.51134	2.08127	1.63128	1.4429	4.24623	4.37835	2.08538	2.0592	2.61777	2.24584	1.04132	1.72043	1.92051	1.2233	2.02427	5.76166	2.54805	1.81405	2.44778	3.21756	3.11966	0.527278	1.61641	1.65605	2.5368	1.75278
ACH-001460	C84	C84_LARGE_INTESTINE	2.30239	1.6474	3.26635	2.71089	1.34529	2.63841	2.8601	2.11313	2.24875	2.38965	1.04065	1.99574	5.31676	4.10402	2.65531	1.29049	1.50107	1.29034	2.14068	4.81998	2.80698	2.19302	1.32407	2.31693	2.40679	2.7924	2.48223	0.9819	2.48332	2.21692	4.02245	2.98925	2.40266	1.36744	2.18094	1.64941	2.99866	3.19229	1.31293	2.09636	3.04071	3.93558	0.8167	1.94899	2.76625	2.2687	1.90788
ACH-001461	C99	C99_LARGE_INTESTINE	2.13876	2.40398	2.47986	3.42133	1.24808	2.68117	2.61975	0.812107	1.23178	2.85396	2.55475	1.18667	2.14978	2.16552	2.62932	0.747785	1.72559	1.84646	1.71052	4.50714	0.656513	1.47409	1.03779	2.31892	1.92764	3.23609	4.30771	1.73169	1.41939	2.52033	1.72712	1.54573	1.45833	1.29055	1.72317	2.15644	2.28818	1.87812	0.77373	2.31534	2.31177	2.55365	0.54766	2.26743	3.0731	2.60479	1.10488
ACH-001484	CI	CI_HAEMATOPOIETIC_AND_LYMPHOID_TISSUE	0.254324	0.102464	0.246391	0.223867	0.3363	0.319417	0.401703	0.309414	0.283287	0.253043	0.295292	0.147942	0.163158	0.270509	0.219646	0.214839	0.189038	0.284856	0.381126	0.247653	0.238568	0.329225	0.168329	0.23964	0.231839	0.178602	0.152604	0.40083	0.375653	0.2565	0.236238	0.247363	0.264152	0.0817038	0.273239	0.26565	0.330755	0.312647	0.205685	0.247841	0.773834	0.327715	0.251163	0.252592	0.622506	0.512735	0.246527
ACH-001485	CII	CII_HAEMATOPOIETIC_AND_LYMPHOID_TISSUE	0.192414	0.0702578	0.1252	0.16229	0.359101	0.0983429	0.204515	0.251789	0.109725	0.144169	0.231206	0.115037	0.0811901	0.28845	0.202666	0.263809	0.31341	0.160968	0.25934	0.361435	0.295962	0.0866993	0.183179	0.184451	0.232671	0.119238	0.0811981	0.254117	0.361986	0.0803363	0.107286	0.149289	0.215161	0.0719603	0.0792885	0.11982	0.239753	0.295113	0.100134	0.203736	0.512996	0.291389	0.23484	0.0714316	0.479072	0.360658	0.347512
ACH-001495	EMTOKA	EMTOKA_ENDOMETRIUM	2.21155	1.7144	1.90526	3.16345	2.0214	2.01884	0.740858	0.76499	1.86459	1.14134	1.76874	1.89945	2.54578	1.59892	2.79689	1.10775	1.77638	3.52694	0.815033	3.28795	1.26147	1.5796	1.25799	2.2236	2.10441	2.05035	1.42909	1.94749	1.57714	3.80509	2.31648	1.94187	3.37233	3.13985	1.33647	1.60554	2.26859	1.32294	1.6485	1.06742	1.9224	3.32451	2.54971	2.20466	3.77161	2.4294	2.96828
ACH-001509	H357	H357_UPPER_AERODIGESTIVE_TRACT	1.04898	1.30458	0.933026	1.26002	0.608045	1.18342	0.700596	1.09245	0.505833	0.552755	0.471785	0.233005	1.02961	0.551521	0.810516	1.37108	1.27961	0.535798	0.654178	0.940566	0.913252	0.402166	0.332092	1.3654	1.09399	0.96406	1.80349	0.579243	0.563451	1.04441	0.863209	0.936441	0.985401	2.71469	0.881925	1.2295	0.660429	0.384818	1.23616	0.82114	0.758057	2.00293	1.03229	1.3771	1.63019	1.15953	0.694024
ACH-001510	H376	H376_UPPER_AERODIGESTIVE_TRACT	0.892841	0.449357	0.372989	0.525235	0.322545	0.708734	0.817518	0.809678	0.655046	0.433358	0.457661	0.384798	1.25794	0.899332	1.19919	1.37621	0.862521	0.280864	0.786258	1.22134	0.799377	0.435097	0.499504	1.30439	0.982235	0.879815	0.824546	0.448827	0.704191	0.605417	0.553152	0.343849	0.6009	0.626161	0.563707	0.884843	0.860209	0.556337	1.12659	0.931014	1.07936	2.85843	1.34423	0.820235	1.46608	0.781623	1.11865
ACH-001511	H413	H413_UPPER_AERODIGESTIVE_TRACT	4.57067	5.40709	3.34683	3.21408	2.22796	3.21914	5.69567	4.3361	5.96564	3.28197	2.7078	5.13708	3.32968	6.0054	2.95717	5.6958	4.86464	5.20308	3.52787	7.11202	4.55656	9.20075	4.64956	3.98543	5.81425	3.10104	5.1932	3.86701	7.69504	7.19216	5.8419	3.52561	4.3142	5.05043	3.73583	1.76344	3.97028	2.0194	2.16033	4.51266	3.53894	6.07415	4.99454	4.16778	10.982	8.99566	4.73536
ACH-001513	HCA1	HCA1_CERVIX	3.09965	0.388916	5.83699	5.01596	2.1336	9.92769	1.71062	3.32004	4.27403	3.65171	1.18777	2.60299	0.902954	6.11252	2.04617	3.2231	2.76235	2.91339	6.05093	1.99544	2.76452	2.90553	2.03842	6.39508	2.46676	3.03391	1.9874	6.32576	6.48539	4.50841	5.63185	0.82538	1.77559	2.11906	1.91796	2.78632	5.06297	2.99153	0.815892	2.74592	4.19055	2.53331	1.97001	3.1985	3.97277	2.1641	2.55579
ACH-001515	HCS2	HCS2_CERVIX	3.02985	3.92965	2.75166	5.44144	2.84053	1.9288	6.21513	3.25281	4.21807	2.99626	2.00651	2.72722	1.46602	2.95881	1.3354	1.75339	2.04483	3.27656	3.85572	4.6924	2.35141	4.76934	2.20322	1.06026	1.37585	1.57335	3.26607	5.97162	2.3676	1.17705	4.23209	1.51462	2.29906	2.62507	3.93616	2.28441	1.67614	2.26303	2.13966	8.18474	5.31343	3.05601	2.67838	1.37938	1.89877	1.88529	1.55041
ACH-001516	HCSC1	HCSC1_CERVIX	2.29948	1.96785	3.60125	7.1999	2.36204	1.54817	1.41588	1.3094	2.25482	2.38243	2.07287	4.81141	1.97686	2.68678	1.31638	1.41394	1.24187	4.40084	1.87629	1.43846	0.698844	1.42563	2.12466	1.30549	1.11092	2.14974	2.59957	2.58797	2.06908	2.51093	2.42774	2.39913	1.54574	1.53481	1.88686	2.01395	1.94162	1.30218	3.77182	5.50702	5.19878	2.81326	1.63885	2.01469	1.46998	0.8234	1.67706
ACH-001518	HEC116	HEC116_ENDOMETRIUM	1.40629	1.20039	1.82819	2.73942	0.787442	1.02452	1.77051	1.90143	1.19962	1.22956	0.626341	1.37609	1.26887	1.3509	0.720424	1.50264	0.35131	2.97951	1.55839	1.9298	0.651855	1.78887	1.0323	2.56582	0.848785	1.79681	1.92298	1.90726	1.60144	0.612654	1.64423	0.912315	1.08594	0.869702	0.906935	0.922996	1.70517	2.0314	1.57841	3.09259	2.1171	2.09105	0.835034	2.56894	1.17716	0.934268	0.982499
ACH-001520	HG3	HG3_HAEMATOPOIETIC_AND_LYMPHOID_TISSUE	0.219544	0.0275329	0.0944463	0.132798	0.382169	0.158909	0.33158	0.337615	0.261388	0.192016	0.303403	0.0818178	0.153461	0.228699	0.157567	0.135597	0.225544	0.204295	0.259488	0.358117	0.389507	0.150257	0.12245	0.305429	0.31258	0.184067	0.311646	0.283982	0.22621	0.237641	0.157989	0.0834974	0.12556	0.0916252	0.241636	0.20305	0.25964	0.275198	0.097468	0.0690622	0.582359	0.284586	0.155334	0.437389	0.405636	0.298591	0.332968
ACH-001521	HKA1	HKA1_SKIN	1.16624	1.61273	1.16819	0.917352	1.20644	0.71374	0.73569	1.12601	0.792669	0.871888	1.69466	1.18974	0.935109	2.03062	1.02958	2.32997	2.06329	0.948102	1.31246	1.9501	1.02689	0.936051	0.70967	1.47771	1.16095	0.707043	0.438048	1.1557	0.77465	1.16107	1.07239	1.94706	0.501369	1.34331	0.774453	0.69052	0.713402	0.729613	0.784337	1.05688	0.454327	2.46562	0.821661	2.03498	1.35545	0.644882	1.73222
ACH-001522	HMY1	HMY1_SKIN	1.92019	3.2528	1.74118	1.25154	1.05151	1.71703	1.38993	1.31647	2.19314	1.09394	2.50629	3.69314	0.977994	1.90709	2.11732	1.1138	0.991535	1.54983	1.39836	2.44997	0.660645	2.5519	1.72434	1.29654	1.49741	1.54798	1.00733	1.26124	1.07075	2.64068	1.53829	2.11081	3.21407	2.0352	1.0557	1.7648	1.13345	1.31331	1.74099	1.87218	1.3897	1.76952	0.726005	2.50229	5.75496	1.76609	1.86251
ACH-001523	HSC1	HSC1_SKIN	3.09151	3.62883	3.51894	1.97315	5.63461	3.47519	3.04413	2.13682	1.59177	2.15558	4.52018	4.64653	1.87502	5.09841	5.27786	4.93739	3.34037	3.75088	2.25191	3.65435	0.465893	3.95492	2.17273	2.16146	1.42598	1.94707	1.67371	4.43284	0.903976	4.61168	2.79213	3.23066	1.92502	3.84579	2.16653	2.29056	1.3531	1.82284	2.42699	3.0511	0.702274	4.04124	1.30436	2.0821	6.03602	3.68186	2.02934
ACH-001524	HSC5	HSC5_SKIN	4.44032	4.09013	2.43344	2.84341	2.33423	3.53198	5.28799	3.19422	3.33797	3.05922	3.47232	6.55961	5.12783	2.71908	3.52239	4.06542	2.35642	2.31815	2.47916	6.98402	1.40378	4.19225	6.44095	3.16097	5.51066	3.20333	7.26178	8.15907	3.21715	2.18784	3.42261	6.57636	6.26036	4.98713	4.45707	1.73738	3.54662	1.43567	5.16657	3.259	4.06474	8.28221	3.46897	10.1368	9.67869	15.4949	3.68818
ACH-001532	JMURTK2	JMURTK2_SOFT_TISSUE	1.42691	1.43912	2.77684	1.27727	1.95092	0.633142	2.01708	1.80687	2.40833	0.757239	0.910412	1.16748	0.278646	1.06138	0.734282	1.26866	0.897185	2.17283	0.695613	1.29659	2.75068	0.896737	0.649202	1.16443	0.609137	1.40538	0.946943	1.47718	1.64238	1.21188	1.17378	1.05937	1.64157	1.11241	0.618315	1.58722	1.9168	4.08831	1.3493	1.1327	2.1994	1.35613	0.982611	1.44822	1.19995	0.488633	1.04166
ACH-001536	KKU100	KKU100_BILIARY_TRACT	2.85576	0.750081	3.89136	2.50461	2.53354	3.57883	2.73127	3.72104	2.04355	1.59959	1.68341	0.880511	0.261263	2.91718	3.44097	2.61241	2.86698	1.07303	3.91727	2.20768	1.30592	4.7542	1.47583	3.01067	1.9063	1.53269	3.57864	3.02152	2.0009	1.99183	3.02542	0.788449	2.17856	2.21676	1.25097	2.33254	2.2828	6.11832	0.898096	1.45613	6.05493	4.65222	1.10184	3.30352	3.63028	2.38277	2.75639
ACH-001538	KKU213	KKU213_BILIARY_TRACT	1.69903	1.89525	1.39452	1.00043	2.29355	0.971192	3.81171	1.97486	1.65645	1.41296	2.01788	2.06906	0.615466	1.33206	1.9858	1.91274	1.70402	2.03348	1.62669	3.36855	3.01828	1.71211	1.34047	1.95871	1.86382	1.48358	1.3443	3.81091	2.06595	1.3056	1.99145	1.30797	1.0518	1.50343	1.36239	1.26868	1.64889	1.48304	1.19024	2.43761	1.86354	1.09227	0.942543	1.72529	3.60008	2.70229	2.17256
ACH-001539	KML1	KML1_HAEMATOPOIETIC_AND_LYMPHOID_TISSUE	0.218426	0.252983	0.16276	0.114744	0.289496	0.193824	0.230141	0.241191	0.227859	0.247978	0.25764	0.172573	0.0755869	0.0727323	0.241965	0.184972	0.300138	0.168927	0.207637	0.1794	0.112983	0.102111	0.107063	0.296075	0.2156	0.243411	0.412981	0.309431	0.247502	0.0988273	0.110436	0.13179	0.264032	0.0370476	0.0769212	0.240807	0.353098	0.290342	0.349056	0.274594	0.189739	0.319599	0.210333	0.263127	0.159707	0.469796	0.196196
ACH-001540	KMLS1	KMLS1_SOFT_TISSUE	3.65666	1.77351	3.33379	2.43297	3.06576	4.00031	3.73854	2.95786	4.92023	5.6512	1.49024	4.30829	3.82898	8.97383	2.18918	2.70476	2.5763	2.78096	2.49528	2.79601	0.926629	4.51434	2.14484	2.51403	4.4948	5.85781	3.92547	1.6566	2.71185	4.85581	3.52332	3.01686	7.88525	1.71623	2.65106	3.048	3.47931	1.29581	5.80699	2.03567	4.19206	6.70691	2.66084	2.20902	7.55182	5.80333	3.26411
ACH-001541	KMS28PE	KMS28PE_HAEMATOPOIETIC_AND_LYMPHOID_TISSUE	0.529745	0.424503	0.558125	1.16321	0.142734	0.487373	0.296908	0.389663	0.448372	0.598569	0.836844	0.575036	0.231723	0.782439	0.415425	0.0940427	0.795969	0.331404	0.598092	0.669333	0.155991	0.651501	0.490241	0.230962	0.626883	0.298421	1.04603	0.61044	0.657693	0.453388	0.63428	0.453696	1.06497	0.273111	0.507658	0.592285	0.280466	0.574338	0.232034	0.457967	0.539666	0.491309	0.321128	0.753248	0.870121	1.08081	0.485373
ACH-001543	KOSC2CL343	KOSC2CL343_UPPER_AERODIGESTIVE_TRACT	1.38808	2.0178	1.22232	1.56435	1.43547	1.19072	1.81941	1.44861	1.11405	1.73624	1.03897	1.08153	0.68033	1.17471	1.55926	2.31401	1.66899	1.62145	1.00301	1.2207	1.22422	1.36441	1.01592	1.87987	1.29422	1.25342	2.61447	1.45665	1.12523	1.68234	1.01503	1.33748	1.38228	1.52084	1.0105	1.28371	0.933029	0.986445	1.19001	1.72996	1.26936	2.91126	1.13781	2.36292	2.5754	1.5705	1.2493
ACH-001548	LS	LS_AUTONOMIC_GANGLIA	0.738458	0.686722	0.43255	1.23905	0.282841	0.707242	1.4721	0.702858	0.815895	0.464196	0.332302	0.605556	0.263504	1.25929	1.01525	0.945572	0.681509	1.09803	0.779792	0.616194	0.892941	0.869821	0.490516	0.390761	0.514121	0.398199	0.644469	0.738173	0.49432	0.757821	0.627322	1.23376	1.1675	1.01379	0.442636	0.763044	0.591478	0.332927	0.783663	0.824079	0.957042	0.853558	0.333481	0.625212	1.1256	0.586784	0.865861
ACH-001550	MCC13	MCC13_SKIN	2.65181	0.86004	2.02596	4.27151	1.52898	2.30047	2.32452	3.0018	3.05463	2.90146	1.47031	2.20053	3.53176	2.88351	1.78978	4.22754	3.14375	3.74523	3.24967	2.75877	1.09269	2.89787	2.42607	3.63268	1.43586	3.13614	2.13446	1.58552	3.65935	0.677301	1.7823	2.06934	4.74355	2.00531	2.15301	1.09816	3.22471	2.81683	1.29961	4.7737	3.30251	2.53983	1.69691	3.06382	2.50457	1.45775	2.42777
ACH-001551	MCC142	MCC142_SKIN	1.6766	1.20227	1.51016	2.05702	0.934372	1.39063	1.33523	1.42789	1.51781	1.58054	1.01795	2.00597	2.25741	2.03836	1.35269	1.32911	1.35429	1.1478	1.2033	2.36475	1.09965	2.48379	1.44478	1.6271	1.61415	1.87526	1.74504	0.916657	1.74107	1.77121	1.05351	1.89501	2.49964	0.62086	1.8062	1.38718	1.60817	1.14321	1.90743	1.5109	2.33046	2.68605	1.09302	1.41438	2.09913	1.63007	1.49481
ACH-001552	MCC26	MCC26_SKIN	2.60943	1.62085	5.62213	4.35363	1.60125	1.87318	2.99233	2.53038	2.11555	2.6056	1.8341	2.53454	4.58805	1.99224	2.03223	1.93774	1.64365	3.30455	1.95352	3.15632	1.18122	2.30464	2.88803	1.71983	2.03221	2.52201	2.46468	1.40286	3.395	1.98451	1.7831	2.88645	3.40348	2.06931	2.91412	1.93909	2.279	3.54542	1.76395	4.23484	2.66772	2.4976	1.04944	3.55074	2.75852	2.24294	2.30601
ACH-001554	MEL202	MEL202_UVEA	1.84184	2.25756	1.40193	2.44	1.10232	1.10148	3.02072	1.155	2.77331	1.86504	1.44508	3.37045	1.48215	2.15748	1.10676	1.51534	0.805146	1.00536	2.55354	1.71197	1.01197	2.25095	1.95904	2.28867	1.3319	2.80155	1.79251	2.21503	1.79558	1.38277	1.32027	3.39761	2.01967	1.34691	1.61255	0.931566	1.73003	1.92761	1.08344	4.00158	2.3882	1.55051	0.89813	1.58459	3.94295	2.36692	1.8335
ACH-001555	MERO14	MERO14_PLEURA	2.60003	2.87763	5.51008	4.82893	0.710938	2.98146	6.62515	1.78793	3.18223	4.93007	1.17205	4.1345	2.81575	2.07373	3.67771	1.10962	0.890317	1.47755	1.71439	2.38077	1.69968	1.75174	2.7121	3.28119	3.52542	2.13377	2.85989	2.73142	1.77197	2.46992	4.78146	2.59665	1.9196	2.28243	3.19239	1.93843	1.46004	1.40384	2.63132	2.14052	3.97072	3.43105	2.13282	2.63075	3.45512	4.42038	2.21548
ACH-001556	MERO25	MERO25_PLEURA	1.794	1.16917	4.66769	2.63511	0.997033	2.0676	6.92464	3.47675	1.21338	1.7181	0.6093	1.25336	1.62809	1.82626	2.43112	1.98518	1.69967	0.726493	3.30124	2.72837	0.379752	2.68045	1.36862	4.49602	1.02315	1.46134	1.23772	1.86836	2.61341	1.98772	1.04713	1.26016	2.16904	1.6143	1.53242	1.22082	1.26432	2.5045	0.59464	2.91958	0.747691	1.33879	2.15066	0.774162	2.11792	1.55045	0.806568
ACH-001557	MERO41	MERO41_PLEURA	3.40315	3.36401	5.28609	2.55925	2.64669	4.92088	4.39075	3.53295	4.14404	4.50316	2.39106	3.02865	2.82017	2.88979	2.04436	2.69055	2.69124	2.81654	3.60857	3.89466	1.98612	3.89845	3.88419	2.87197	2.64238	3.26275	3.84719	2.86439	4.72847	3.36574	2.69048	2.3632	7.98354	2.56134	2.04444	1.65361	3.49298	4.34491	1.60957	2.9637	2.69849	3.40081	1.83562	3.08021	5.22932	2.86774	3.66264
ACH-001558	MERO48A	MERO48A_PLEURA	4.3192	3.82614	8.83143	11.602	2.47563	3.0254	6.97669	6.7689	4.57457	8.16684	2.34705	4.13794	3.98684	4.39291	3.42703	2.61626	1.34615	5.71746	4.08874	2.95137	1.66974	4.77815	5.38304	3.04405	3.89214	3.82306	3.82469	3.59648	8.19355	2.19023	3.35772	2.88815	5.46449	5.49375	4.83432	2.32874	3.77672	4.75082	2.09166	7.32143	1.75231	1.81991	2.92615	5.48882	4.14506	2.07943	6.88538
ACH-001559	MERO82	MERO82_PLEURA	3.49217	2.70344	6.38026	5.7618	3.6857	2.76711	3.62613	3.77903	2.59893	5.73056	3.38265	3.53221	4.38778	3.41225	2.9422	1.69414	3.14007	5.04532	4.31607	4.17666	3.58371	4.29001	4.29324	2.81278	2.4857	3.07469	3.2028	2.78643	3.25264	3.30416	2.63821	3.36323	4.88399	3.02844	1.45528	1.9472	3.18575	3.08126	3.09973	8.41678	3.96587	3.49065	1.65266	4.28227	4.83781	2.62538	4.77889
ACH-001560	MERO83	MERO83_PLEURA	2.60017	2.33155	5.46228	5.36195	0.92962	2.16481	6.93963	2.3908	3.20127	4.03237	1.2607	2.18167	2.85231	2.28997	4.94628	2.2429	1.75646	1.24083	1.99363	2.1162	1.21771	1.74842	3.44517	3.40767	1.99196	2.78056	3.98384	1.53312	2.33097	2.09734	2.3038	2.72779	3.76731	2.52709	3.19474	1.42348	1.32008	2.88407	1.50954	2.19951	3.66082	1.94212	1.51856	2.84039	2.1884	3.29746	1.6992
ACH-001561	MERO84	MERO84_PLEURA	3.34716	1.50369	7.12334	1.54825	2.08529	2.9959	7.60747	3.97297	5.25112	5.65997	2.15051	5.19016	2.96527	4.10709	3.28591	2.17614	1.94038	3.1705	5.29381	3.58488	0.993628	3.19382	3.8442	3.90997	3.58935	3.52661	2.25246	1.80229	7.39858	2.00387	3.24943	1.12981	3.53424	2.92658	4.69376	1.24877	3.40463	4.26324	1.08352	6.70094	3.49299	1.75246	2.02798	2.35226	2.39138	4.51774	3.05356
ACH-001562	MERO95	MERO95_PLEURA	3.65393	4.68213	6.86146	3.64952	2.61286	3.89684	5.85201	5.1935	2.8163	4.16275	1.93478	2.16715	2.24726	1.31123	3.20749	3.14283	4.39774	3.45375	4.41293	6.09717	1.77102	4.95691	7.09704	4.47504	3.08862	3.11633	4.30942	3.29164	3.00262	1.80558	2.54896	2.748	4.19037	3.08254	3.48965	2.94577	3.31582	4.79179	3.10148	8.70098	2.70223	2.8801	0.713528	4.23058	4.39063	1.6937	2.09076
ACH-001563	MM127	MM127_SKIN	3.05621	1.01832	5.6573	5.72892	1.96001	2.07213	3.86462	2.20966	1.82293	3.87423	1.71309	3.68046	6.29408	5.47222	2.58216	3.71644	2.21394	2.29706	4.90046	3.81322	1.12108	1.23784	4.28245	2.49521	1.83388	3.0529	2.83479	1.38391	2.8514	1.29487	2.41064	3.81827	3.54597	1.12841	2.76965	0.819014	1.8797	1.72306	2.56703	4.19815	8.70859	5.41149	2.7477	1.62857	4.21742	4.11129	2.47906
ACH-001566	MM370	MM370_SKIN	2.19236	2.33614	2.0183	1.72977	2.37597	1.84873	0.883318	3.21444	1.99866	1.04675	2.00644	1.82502	0.642186	3.38794	1.54907	1.85006	2.40342	1.82052	1.62235	3.63052	3.23769	2.90595	1.34739	1.34126	0.827909	1.49652	1.9098	1.18622	2.58591	2.32667	2.93419	2.02835	2.33194	2.04467	1.55277	1.9427	1.65106	2.07587	1.60148	2.36817	2.72146	3.55061	1.48741	0.791203	1.87104	2.35841	2.93742
ACH-001567	MM383	MM383_SKIN	2.42309	1.83744	3.22379	1.28149	1.20758	2.094	2.51366	2.94905	2.33058	2.82214	1.19883	1.8336	1.73647	4.11839	3.51203	1.59525	0.337499	0.852638	2.98727	2.72043	2.22139	1.41665	2.23222	5.2562	2.18391	5.56745	4.01127	4.00868	2.891	1.54882	1.02058	1.11757	2.19955	2.67528	2.8965	1.65315	3.30235	1.65179	1.94809	1.90382	2.04622	0.621426	1.32637	1.33639	2.29155	1.91256	2.16716
ACH-001568	MM386	MM386_SKIN	1.5439	1.92209	1.05557	1.19899	1.65852	1.65868	1.38948	2.56116	1.37821	0.871269	2.96201	0.924923	0.757321	1.38094	0.985155	1.33766	1.10008	0.669692	1.12948	1.79761	1.68753	1.24783	1.31908	2.12622	1.11409	1.93774	2.05872	1.0454	1.19217	0.645116	0.912703	1.2855	1.66485	1.04318	1.04027	1.9808	1.70115	1.80107	1.6131	1.72846	1.22208	2.73256	2.37357	2.13789	3.38083	1.59395	1.25702
ACH-001569	MM415	MM415_SKIN	2.67012	3.91924	2.48233	2.37618	2.2247	2.07422	3.14841	2.32884	2.253	2.22565	3.61191	2.2599	1.63487	3.14146	2.68673	1.34906	2.27414	2.45271	2.24915	2.78039	1.38883	2.23322	0.873513	1.04728	1.37367	2.52311	3.52244	1.77157	1.93386	1.19308	1.87518	2.10541	5.95017	1.94628	1.81388	2.05959	2.66596	2.26074	2.60855	3.39033	5.45171	4.37726	1.50576	1.87517	2.69342	3.56762	3.60601
ACH-001570	MM426	MM426_SKIN	3.64757	6.09431	3.47311	5.31676	5.31462	2.41523	4.00646	4.22511	3.74947	3.48314	4.35926	2.53735	1.79492	2.92223	4.07342	1.53849	3.03538	5.0656	1.98439	3.94342	1.40655	3.25695	2.14529	3.07228	1.76036	3.73889	2.14812	4.77092	1.9891	1.71505	3.46352	2.69138	8.57532	4.1759	2.33762	3.37828	3.18344	3.6584	3.80595	5.02344	3.65595	3.26858	1.60499	2.49746	3.14518	2.79139	3.17437
ACH-001573	MOLM1	MOLM1_HAEMATOPOIETIC_AND_LYMPHOID_TISSUE	0.256031	0.0652835	0.305266	0.42604	0.225544	0.214874	0.314472	0.209902	0.205468	0.238176	0.174069	0.11984	0.392122	0.343314	0.1207	0.59204	0.387712	0.197172	0.0815019	0.121664	0.589903	0.106219	0.15528	0.329144	0.128184	0.228572	0.0806445	0.21738	0.360307	0.131134	0.471112	0.148909	0.289202	0.103891	0.0848577	0.210614	0.18532	0.1844	0.253288	0.222347	0.734536	0.472848	0.19049	0.270984	0.398787	0.259903	0.218049
ACH-001574	MOLM14	MOLM14_HAEMATOPOIETIC_AND_LYMPHOID_TISSUE	0.0937305	0.0442503	0.0355033	0.157541	0.216665	0.0720617	0.158299	0.0807675	0.123549	0.0602498	0.150028	0.053781	0.0833723	0.220801	0.132469	0.148537	0.0832588	0.0990366	0.0538953	0.240648	0.0971701	0.0656899	0.0499887	0.133866	0.0837649	0.0539552	0.0494834	0.133531	0.0572578	0.0574757	0.0783203	0.0709643	0.0983589	0.0467348	0.0828511	0.0988554	0.0587241	0.159561	0.0540873	0.119683	0.175046	0.0692138	0.133612	0.181948	0.0793578	0.0870337	0.0655136
ACH-001577	MUTZ8	MUTZ8_HAEMATOPOIETIC_AND_LYMPHOID_TISSUE	0.217107	0.112408	0.420017	0.19495	0.0792742	0.168973	0.168612	0.0911062	0.146977	0.221461	0.119853	0.358431	0.641872	0.478548	0.160668	0.129969	0.0958942	0.297051	0.0377665	0.353356	0.378304	0.163532	0.122627	0.31866	0.0503646	0.209129	0.0469984	0.361813	0.0809862	0.259623	0.306096	0.176804	0.274374	0.030521	0.0456072	0.158341	0.0423132	0.106664	1.37201	0.231647	0.264439	0.344	0.234675	0.314271	0.23156	0.0372382	0.0598079
ACH-001578	NCCIT	NCCIT_TESTIS	1.43303	0.981478	1.12008	0.967695	2.15213	1.05871	1.16959	1.58821	0.886389	0.904046	0.802378	1.61822	0.636089	1.80084	2.09612	0.635719	1.9885	1.6684	1.69318	2.22211	0.414813	1.02285	0.88948	0.616175	1.40995	0.995706	1.1953	1.75955	1.5795	2.17294	1.23246	0.698371	2.71371	0.725783	0.990408	1.35421	0.825509	1.00656	1.02964	1.26364	0.287195	1.3462	1.32271	1.37842	1.6855	0.497898	1.60199
ACH-001607	NOZ	NOZ_LIVER	2.33454	2.40961	2.00844	2.63198	2.12212	2.0282	2.95782	1.31535	2.46807	4.90324	1.92864	4.67615	1.19866	1.76099	5.60257	1.93099	1.54145	1.59354	1.44787	2.17398	3.3244	1.72816	2.35302	3.60494	1.39015	2.4101	2.56811	4.71727	2.09192	2.29088	2.53246	1.21806	1.52384	2.33351	2.06027	1.62892	1.84907	1.0123	2.303	3.82465	1.34747	1.78663	1.89354	2.57684	2.51538	3.12364	3.0949
ACH-001608	NP2	NP2_CENTRAL_NERVOUS_SYSTEM	2.85753	2.46622	2.99735	4.27073	4.00095	4.70061	1.85409	3.48193	2.36646	3.80337	1.27227	5.28285	2.52505	4.10551	2.88789	2.22608	1.17751	5.09871	2.05372	2.25533	1.1584	3.04075	3.82151	1.95193	2.06073	3.91433	3.2282	1.47417	2.73233	1.68942	1.66687	2.17178	3.50503	0.991054	2.72719	3.31002	3.32347	3.16173	9.36161	3.00762	6.03923	2.87176	2.22153	2.68038	1.70552	1.33673	2.15792
ACH-001609	NP3	NP3_CENTRAL_NERVOUS_SYSTEM	2.35403	1.97434	2.20991	2.62013	2.25552	3.52891	3.01794	3.07914	1.9382	4.9872	1.23722	1.46792	3.67576	3.56468	4.04471	2.52751	1.50512	1.89885	0.736942	2.52353	1.32707	3.47884	2.37262	2.03585	2.2916	3.37739	4.19465	2.19267	2.12013	1.59349	1.82595	0.904962	2.49561	1.38965	2.93062	1.23995	2.96495	1.44907	5.42928	2.09712	4.66625	1.85815	1.80341	2.56994	1.86871	3.95887	2.03742
ACH-001610	NP5	NP5_CENTRAL_NERVOUS_SYSTEM	2.22864	1.49286	1.72774	1.70882	1.84272	2.05113	1.88513	2.36531	2.11095	1.79639	2.75369	4.64648	3.17678	1.75074	2.42621	2.60934	1.2639	0.982324	0.775797	1.69567	1.7361	1.26713	3.23542	1.61983	2.30959	2.54842	1.55932	1.63052	1.24046	0.927955	1.11408	2.11856	2.52886	1.19418	2.32099	1.77576	4.29125	1.73357	4.70002	2.70994	3.6131	1.77735	2.53526	2.24654	4.92564	2.34387	1.34707
ACH-001611	NP8	NP8_CENTRAL_NERVOUS_SYSTEM	5.26554	3.977	5.17207	7.15281	5.67555	2.16013	5.51462	6.1639	5.08038	4.58656	2.1094	4.72508	2.95132	7.88855	7.6207	5.86757	2.76969	8.03874	3.28623	3.2169	2.58138	2.69297	3.76547	2.52279	4.0654	3.03909	2.54407	5.94664	8.62121	2.13518	5.15211	4.11055	13.2065	2.43612	3.47902	2.23921	6.55872	10.3029	7.2023	7.41925	10.672	5.5051	6.40769	3.52243	4.42781	5.50843	6.27276
ACH-001613	OCIAML4	OCIAML4_HAEMATOPOIETIC_AND_LYMPHOID_TISSUE	0.171698	0.0648248	0.119511	0.0860183	0.178815	0.0556494	0.194606	0.142997	0.330874	0.10031	0.130904	0.402556	0.133657	0.390381	0.0311465	0.136446	0.139094	0.0492367	0.096763	0.118234	0.338381	0.0866488	0.367045	0.108152	0.0544081	0.0639521	0.0901303	0.348509	0.267668	0.254469	0.237822	0.162939	0.217176	0.04193	0.0409934	0.330134	0.154241	0.102689	0.564253	0.278599	0.153583	0.418855	0.0632514	0.166952	0.225037	0.0325525	0.290166
ACH-001616	OCILY18	OCILY18_HAEMATOPOIETIC_AND_LYMPHOID_TISSUE	0.230706	0.175848	0.201306	0.283445	0.356289	0.121427	0.215737	0.490446	0.239121	0.256713	0.235609	0.129979	0.129276	0.313201	0.243601	0.303595	0.196244	0.192343	0.169687	0.193737	0.107622	0.262523	0.133238	0.214962	0.248957	0.239355	0.261654	0.226527	0.627698	0.184285	0.207153	0.140763	0.0864254	0.0524666	0.117049	0.218335	0.330757	0.311604	0.148196	0.0720565	0.219009	0.297461	0.299887	0.370906	0.115429	0.0990207	0.332191
ACH-001618	OCIM2	OCIM2_HAEMATOPOIETIC_AND_LYMPHOID_TISSUE	0.638406	0.413573	0.617337	0.481369	0.704277	0.471441	0.537821	0.602978	0.798743	0.31279	1.92853	0.858089	0.35188	1.02858	0.588533	0.317465	0.363763	0.264818	0.527921	1.4949	0.277392	0.463864	0.640625	0.292701	0.757105	0.552315	1.06199	0.486309	0.837799	0.867671	0.798637	0.472573	0.355395	0.768034	0.574518	0.853154	0.224407	0.325089	0.295873	0.360828	0.262897	0.867597	0.18799	0.584766	1.22323	2.97651	0.817965
ACH-001619	OCUG1	OCUG1_BILIARY_TRACT	1.70036	1.27412	1.35959	0.899885	3.12524	2.5793	1.49052	1.25985	1.85022	1.53867	0.99072	2.89049	1.56943	1.30069	1.03976	1.55965	1.94651	1.69989	1.07991	2.25572	1.264	1.1708	1.42275	3.03976	1.29789	3.83255	0.938172	1.51715	0.912783	1.1646	0.631719	0.881948	1.99362	1.049	1.27761	2.5096	2.35629	0.888175	1.29303	1.96101	2.08038	4.02371	1.55292	1.5058	2.98794	1.28628	1.14853
ACH-001622	ONDA7	ONDA7_CENTRAL_NERVOUS_SYSTEM	3.2374	2.66596	2.221	1.511	3.68287	3.39935	2.4778	3.32558	5.31315	5.12772	1.15721	4.39392	2.97376	6.86637	3.16523	3.23609	2.00161	2.05761	3.00867	2.51545	1.49221	4.08475	3.13703	2.56439	3.02245	6.17506	5.79186	3.66102	3.9681	2.14427	2.44892	2.36582	3.00378	1.44005	3.39506	7.96074	4.73445	1.81711	5.23299	2.79074	4.45202	3.57836	2.07695	1.21729	4.05907	7.52753	4.24001
ACH-001623	ONDA8	ONDA8_CENTRAL_NERVOUS_SYSTEM	4.15018	2.53662	8.49535	5.3033	3.81705	6.55894	2.845	5.84806	2.69567	6.28857	1.4307	4.92305	4.40966	6.92085	5.76822	2.03046	4.39682	9.83443	4.97344	3.87067	1.38279	3.31651	1.75443	1.99934	4.68192	3.8876	1.79524	3.70021	3.53664	6.80504	5.35169	2.30988	4.74432	5.40256	3.83816	2.98946	3.34836	4.02032	3.58918	4.32235	3.53546	3.18602	2.16178	2.22614	3.32856	3.68279	6.29745
ACH-001624	ONDA9	ONDA9_CENTRAL_NERVOUS_SYSTEM	5.11405	1.95266	7.51122	1.77334	4.61252	4.03221	3.35837	5.21272	5.21611	3.38117	1.98934	5.57514	4.58906	21.1058	1.94813	5.43463	4.9992	8.67425	3.58044	8.27936	2.2014	3.74812	3.29712	3.95071	3.80428	5.94567	2.65951	3.31434	5.57044	3.61055	3.00474	4.99019	4.16255	1.90528	3.52588	5.98363	2.89834	2.92347	8.6066	3.86635	5.87039	13.0009	10.612	4.86286	4.80836	5.22441	10.246
ACH-001627	P4E6	P4E6_PROSTATE	1.4031	1.44652	1.42072	1.5761	0.990516	1.56365	1.16427	1.50406	0.585512	1.30405	1.30875	0.730513	1.39477	0.895517	0.642354	1.75523	1.55152	1.17584	1.17457	1.52869	3.30766	0.882094	0.856795	1.75421	1.21865	1.34958	1.97912	0.882144	1.12457	3.00918	0.97833	0.950393	0.988873	2.21324	1.51678	2.79286	1.03914	0.825599	1.73234	1.56788	2.00321	1.84218	1.01282	1.71849	3.14217	1.65195	1.09177
ACH-001628	PEA1	PEA1_OVARY	3.43322	2.57974	4.60672	2.27052	2.76619	2.31628	5.20497	2.28918	2.48645	3.43721	2.92816	3.14438	3.88674	3.36925	4.18948	2.04598	1.76309	5.12778	4.16494	4.44976	1.45396	2.30186	3.25357	3.27897	2.84423	3.27751	2.41767	6.0977	3.32737	3.63265	2.1264	3.21437	2.67374	4.34311	4.14433	2.46092	3.24478	3.26014	3.81221	4.34808	2.35381	2.93566	1.93449	2.47301	4.55291	3.12985	4.24139
ACH-001632	PEO4	PEO4_OVARY	1.9081	0.497594	1.88623	3.19225	2.42043	1.59711	1.21569	1.44752	0.993928	1.74517	1.63322	0.655381	1.35326	0.989354	1.51796	1.11809	2.5848	2.69282	1.50505	2.06946	1.85067	1.48083	0.765772	2.53556	2.43931	1.82656	1.5515	1.82865	1.71533	2.3184	0.331067	0.897297	1.55357	1.83777	1.16701	3.85909	5.75122	2.45142	1.06884	2.00155	1.14131	2.28693	1.5271	1.74704	3.80603	1.51248	2.97155
ACH-001634	PGA1	PGA1_HAEMATOPOIETIC_AND_LYMPHOID_TISSUE	0.156256	0.0466903	0.146266	0.172245	0.135279	0.151734	0.142049	0.191329	0.127042	0.102381	0.14369	0.048819	0.27971	0.0876676	0.297356	0.150623	0.163553	0.381566	0.10487	0.0645465	0.131031	0.076353	0.0649005	0.252334	0.272141	0.10602	0.117747	0.225173	0.119514	0.103863	0.123183	0.0723588	0.113313	0.0552054	0.363218	0.263473	0.18302	0.255524	0.103622	0.104307	0.47035	0.145708	0.0912142	0.109761	0.360094	0.448376	0.198788
ACH-001636	RAMOS	RAMOS_HAEMATOPOIETIC_AND_LYMPHOID_TISSUE	0.15358	0.154239	0.115475	0.151621	0.289827	0.0600883	0.142136	0.229613	0.210341	0.0813499	0.118205	0.0629091	0.136808	0.220447	0.124363	0.330685	0.220855	0.0753155	0.175386	0.148545	0.271058	0.204195	0.0973327	0.142775	0.127782	0.164508	0.333588	0.0368001	0.375192	0.0910982	0.102265	0.124359	0.0897455	0.0304241	0.131896	0.0912999	0.116983	0.161893	0.0819588	0.199157	0.600159	0.204262	0.12827	0.100205	0.241117	0.168272	0.0508746
ACH-001642	SCC3	SCC3_HAEMATOPOIETIC_AND_LYMPHOID_TISSUE	0.206014	0.150945	0.241193	0.238878	0.262965	0.229626	0.0801828	0.176837	0.201856	0.0958215	0.19829	0.0313879	0.106486	0.360082	0.512541	0.292488	0.172155	0.228705	0.1146	0.281501	0.108222	0.100843	0.0609918	0.605944	0.197435	0.135932	0.182117	0.495642	0.0981961	0.351573	0.190342	0.083191	0.107279	0.155543	0.243327	0.105668	0.0891298	0.337996	0.0912554	0.0650641	0.12953	0.17159	0.238804	0.054438	0.346321	0.162034	0.12906
ACH-001645	SEKI	SEKI_SKIN	1.97708	1.42847	0.891908	4.03698	1.42037	1.21276	2.77389	3.62229	2.66217	2.22864	1.66697	1.98891	0.535823	2.67819	1.41888	1.29399	0.320206	0.46247	1.31766	3.02761	1.78088	2.09878	1.10753	2.91161	1.41973	1.48083	2.69693	3.49136	2.71492	0.620759	0.862784	2.41573	2.78323	0.669282	2.22725	0.826105	3.02608	2.42342	2.28168	2.42974	3.14815	2.02979	2.18135	2.42101	2.64383	2.1927	2.6224
ACH-001647	SHI1	SHI1_HAEMATOPOIETIC_AND_LYMPHOID_TISSUE	0.090599	0.0748244	0.0762945	0.0442545	0.0482921	0.0627808	0.115229	0.0997608	0.227323	0.0751938	0.0987039	0.103553	0.0688507	0.108486	0.150044	0.247424	0.11278	0.0901935	0.0410931	0.034538	0.124421	0.1035	0.0329994	0.233234	0.0675264	0.0450601	0.0131647	0.181791	0.075614	0.0955354	0.0905905	0.130687	0.145961	0.0766458	0.0543797	0.0229805	0.0649127	0.17086	0.103272	0.0890998	0.0841578	0.0792261	0.10878	0.0935933	0.153991	0.0679275	0.05059
ACH-001648	SHMAC4	SHMAC4_PROSTATE	2.243	2.47804	3.41733	2.81323	1.98911	2.50078	3.32195	3.01532	1.83906	2.12541	1.45226	0.936493	2.0597	2.0207	1.86997	2.45383	2.74447	2.06958	3.41822	2.86515	0.910753	2.76957	2.09552	1.84128	1.60877	1.83414	2.87402	0.9493	3.23549	2.95418	1.96535	4.76505	1.41382	2.87238	3.76778	2.35454	1.41988	1.6708	1.4556	2.48529	1.83739	1.83771	0.70469	1.90611	1.12066	1.86427	2.14437
ACH-001649	SHMAC5	SHMAC5_PROSTATE	2.89481	2.27907	3.85473	5.47989	2.27225	3.22019	2.54437	4.06981	1.48115	1.91941	2.45166	1.04322	3.97699	2.83756	1.66935	3.79483	2.8365	3.38766	1.65464	3.72853	2.12519	2.04975	2.0644	4.64453	1.65234	3.21173	3.21974	1.42403	3.0321	2.6306	1.84923	3.1399	4.06578	3.40795	3.96149	1.84566	1.84118	1.89797	1.76133	3.91058	3.03675	2.43409	2.34081	3.56545	3.24432	1.81738	2.23663
ACH-001651	SKGI	SKGI_ENDOMETRIUM	1.34118	1.0636	1.97711	1.70622	1.44431	1.64734	2.09343	1.28926	1.11142	1.10488	1.15331	0.64408	1.36844	1.25322	3.06581	1.14663	1.20687	0.976655	1.98459	2.91789	2.89886	1.69235	1.23465	1.25187	1.34164	1.0884	2.01294	1.23569	1.03921	2.38807	0.981386	0.706069	0.62328	1.35461	1.90841	1.43788	0.727147	1.34233	0.359634	1.25391	0.705104	0.519699	1.10788	0.9295	2.63385	1.81797	0.511127
ACH-001652	SKGII	SKGII_ENDOMETRIUM	2.44001	3.97521	3.3765	2.11136	0.727747	2.09326	2.42974	1.80734	1.88064	1.5905	2.21794	1.10831	1.82364	1.72182	1.61767	2.07023	2.25857	6.79295	2.43355	2.40282	2.13026	1.55767	1.28473	3.17083	2.34006	2.12736	2.15191	4.59583	1.48096	2.34344	1.73765	2.02295	3.09657	2.91912	1.93273	2.42089	2.43243	1.67823	2.61461	4.05977	1.96859	2.13966	2.77252	0.995607	2.66301	4.07132	1.50342
ACH-001656	SKNO1	SKNO1_HAEMATOPOIETIC_AND_LYMPHOID_TISSUE	0.120852	0.0956028	0.0539372	0.118401	0.177756	0.0776648	0.0871658	0.134573	0.145664	0.120682	0.0879936	0.272867	0.211612	0.155381	0.0546731	0.270395	0.0601371	0.0767096	0.0723518	0.174841	0.395458	0.112353	0.153473	0.0445964	0.0265932	0.145133	0.0631831	0.0940712	0.135225	0.144272	0.236957	0.0675818	0.124983	0.154736	0.0451794	0.172113	0.17484	0.0616773	0.409992	0.0704417	0.206642	0.0979624	0.0487247	0.103264	0.0581457	0.0241169	0.0549186
ACH-001664	SNU638	SNU638_STOMACH	1.91698	0.950634	2.32881	5.64138	2.58758	0.70996	1.30611	1.29889	1.38524	1.38376	1.5708	1.43602	9.88802	2.68252	1.96516	1.57094	1.71669	1.14619	1.51756	5.66247	1.97435	0.793743	0.966113	1.92227	1.7578	2.06858	2.18382	1.15091	2.6572	1.08747	2.41291	3.99205	0.636808	0.598049	2.3723	1.41974	2.03313	0.783845	1.53594	1.6784	4.85492	1.70933	1.27456	1.23569	2.13277	5.04428	1.28693
ACH-001668	SUSA	SUSA_TESTIS	0.992102	0.547522	0.755343	1.87116	0.91564	1.10585	0.90701	1.68302	0.332007	0.651983	0.546873	0.30801	0.670745	1.00562	0.616837	0.871184	0.95639	1.4233	0.573844	1.12498	0.522916	0.487755	0.216427	1.05652	1.1532	1.08006	1.19311	0.496383	0.831728	0.623022	0.323049	0.777285	1.15819	0.603604	0.747108	1.35287	1.12592	2.03743	0.92731	0.983851	0.551246	2.06878	0.999421	1.71389	1.92169	0.230485	2.03466
ACH-001670	TASK1	TASK1_CENTRAL_NERVOUS_SYSTEM	0.782809	0.648217	0.288125	0.622729	0.747957	0.560554	0.423498	0.649865	0.66387	0.57303	0.51451	0.390529	0.797661	0.566816	0.908345	0.715532	0.694473	0.698544	0.934848	0.781118	0.284282	0.357116	0.50779	0.973831	0.554466	1.1979	1.16509	0.826992	0.282575	0.720761	0.477622	0.705265	0.789049	0.504795	0.886757	1.17041	0.724495	0.442252	0.396047	1.08397	0.748245	0.914175	1.01351	0.486362	1.52065	1.51735	0.867367
ACH-001673	TFK1	TFK1_BILIARY_TRACT	1.34329	1.80148	1.8752	0.972664	0.720506	2.395	0.953375	1.08642	0.533914	0.843879	1.09199	1.00043	0.906064	0.484336	0.660407	1.50901	1.1682	2.02575	1.30723	1.34942	1.78374	1.25392	0.94943	1.37841	0.949222	0.699347	1.22084	1.24341	0.70522	0.714925	2.07693	1.67863	1.39579	2.34337	2.45317	0.714583	1.22251	1.85461	0.858156	0.860703	2.15837	1.09566	0.877131	1.14993	0.283796	0.819637	0.413757
ACH-001677	U2904	U2904_HAEMATOPOIETIC_AND_LYMPHOID_TISSUE	0.165541	0.17418	0.115549	0.245528	0.468769	0.123303	0.285756	0.290377	0.237747	0.114348	0.0626626	0.261549	0.0652926	0.305935	0.19486	0.256781	0.169652	0.155156	0.137161	0.131488	0.224071	0.18639	0.150843	0.128951	0.10029	0.280979	0.197317	0.15452	0.293813	0.0991761	0.05895	0.161454	0.165717	0.0968515	0.105609	0.283864	0.126972	0.0604583	0.160435	0.140651	0.346866	0.248375	0.312746	0.0803757	0.245337	0.077422	0.192434
ACH-001685	UHO1	UHO1_HAEMATOPOIETIC_AND_LYMPHOID_TISSUE	0.422961	0.28383	0.501404	0.274036	0.325375	0.240654	0.376752	0.308876	0.269479	0.453244	0.144331	0.710259	0.413718	0.318585	0.701296	0.12749	0.216406	0.785724	0.529092	0.541081	0.164441	0.193972	0.523052	1.00805	0.341066	1.06491	0.340795	1.61263	0.31432	0.455791	0.540971	0.231673	0.443763	0.267723	0.41343	0.137203	0.203604	0.350803	0.314196	0.370694	0.265799	0.247007	0.360751	0.367641	0.0493538	0.0960338	0.805747
ACH-001687	UMRC3	UMRC3_KIDNEY	1.89013	0.951253	2.02083	1.55354	2.54453	1.88186	0.730693	2.06991	1.38973	1.22664	2.35399	1.73408	0.919174	1.58554	0.949571	1.45539	1.71271	3.08472	1.50654	2.54612	2.09218	1.9778	2.14125	2.00218	2.1889	1.60987	2.38004	1.31552	2.37185	1.96612	0.976933	1.56037	1.08894	1.14405	1.39075	1.61854	2.02921	1.3118	1.71993	1.00674	0.997179	1.27958	2.38732	4.92519	3.27481	1.04765	2.38668
ACH-001688	UMRC7	UMRC7_KIDNEY	1.47861	0.644411	1.15132	0.564197	0.899373	2.30016	0.847565	1.02876	0.493028	1.97156	1.18593	0.733829	0.851393	0.884021	1.31166	3.22053	0.835671	2.19861	1.04194	1.43239	0.825563	1.29167	1.44257	4.99019	0.997884	3.23337	2.5973	1.44929	1.08433	0.795081	0.996918	1.0178	0.608668	1.03206	1.48056	0.629397	1.9624	0.693636	2.7203	0.434109	0.85348	2.39704	2.94635	4.23005	2.34082	0.811159	0.865917
ACH-001690	UPCISCC026	UPCISCC026_UPPER_AERODIGESTIVE_TRACT	1.54658	1.85325	1.77737	1.90039	1.02167	0.804349	2.18118	1.76523	1.23009	1.33312	2.24355	1.15771	1.93474	1.70953	1.36128	1.79673	1.09778	2.32241	1.40245	3.08861	1.44647	1.58678	0.823909	1.59228	1.21942	1.21976	1.77716	1.43638	1.73998	1.48034	1.74186	1.70954	1.02633	1.13157	1.0982	0.974851	1.04004	1.59466	1.06219	2.59139	0.958994	2.13655	1.59815	1.64199	2.03037	1.78067	2.08117
ACH-001692	UPCISCC040	UPCISCC040_UPPER_AERODIGESTIVE_TRACT	1.94559	1.98472	1.76246	0.431109	1.2316	1.78118	3.45145	1.77237	1.87295	1.19162	1.24915	1.73333	1.09181	2.41261	1.25709	2.6765	1.61593	1.30497	1.85501	2.19325	1.34925	1.53208	1.84636	1.9341	1.55735	1.73563	1.34821	1.70762	1.76652	2.12433	1.68752	1.39475	2.00124	1.49366	1.49306	1.33778	1.56392	0.70313	2.22783	2.0456	1.63067	1.70169	2.07296	2.01859	3.97553	1.71111	3.85717
ACH-001694	UPCISCC074	UPCISCC074_UPPER_AERODIGESTIVE_TRACT	3.329	4.20037	3.1062	4.54998	1.79748	3.20825	4.50508	2.24402	3.88969	1.96399	3.69961	3.37636	3.26607	2.54759	1.77592	2.19603	1.42716	3.64598	2.73665	5.13198	2.21926	4.21356	2.28656	1.51756	1.97027	1.8712	2.67724	4.98757	1.10245	3.92683	6.75538	3.4029	1.89078	9.21355	3.483	1.5416	1.1396	1.74737	3.44005	4.98289	4.87648	3.36331	2.37303	4.41119	2.38419	2.10261	5.25206
ACH-001698	UPCISCC116	UPCISCC116_UPPER_AERODIGESTIVE_TRACT	0.728151	0.680307	0.631436	1.54738	0.541499	0.481481	0.845106	0.448331	0.648605	0.562969	0.75121	0.474384	0.322297	1.00259	1.16496	0.610653	0.646477	0.707175	0.695326	0.921275	0.684001	1.01804	0.631772	0.606555	0.648918	0.50248	1.11454	0.381047	0.495867	0.821429	0.927164	0.594104	0.4196	0.426357	0.433948	0.375008	0.336031	0.343492	0.720806	0.852234	0.650553	1.51008	0.531125	1.124	0.55385	0.47802	0.791474
ACH-001699	UPCISCC131	UPCISCC131_UPPER_AERODIGESTIVE_TRACT	3.06139	3.73011	2.75482	1.7029	1.34449	3.37652	4.84209	2.72359	2.3814	4.29298	1.46597	3.06717	4.97937	2.66505	2.74325	3.39585	2.32201	2.34749	2.79096	3.29419	1.51356	3.48271	3.00457	5.31828	2.37471	3.95811	2.66976	2.92943	2.46969	1.47055	2.33185	5.12291	3.9884	3.46259	1.63731	2.29328	1.87818	1.6364	4.03524	3.19464	2.57647	5.64546	2.9114	2.29205	4.42401	3.74513	4.22915
ACH-001712	HS860T	HS860T_BONE	5.17375	2.00967	8.52262	7.53542	3.64665	2.55691	5.84962	4.87834	8.17891	10.1146	2.31369	7.61302	4.94647	7.63134	4.32428	2.34081	2.98112	2.52372	3.01402	7.73203	4.85814	4.11741	4.99793	3.04275	3.62777	6.37022	5.18198	4.22653	5.68865	6.39027	2.56963	4.5641	7.48592	2.56606	3.93864	3.50954	5.24137	5.19099	4.35287	4.83144	6.44065	3.13599	2.58058	2.41388	6.14637	3.49959	7.30346
ACH-001719	OCIC4P	OCIC4P_OVARY	1.6497	1.61	2.42901	2.24685	1.15375	2.17138	0.782098	0.9699	2.23653	0.971501	1.49402	1.82495	2.32533	1.26046	0.707813	1.37751	1.64017	1.80663	0.635425	2.25207	2.44829	1.29285	1.43916	2.13339	0.821754	1.66703	0.555275	1.42832	0.903134	3.20327	1.67022	1.41656	1.92867	1.31842	1.08087	1.4961	1.58782	1.76289	1.8897	1.22622	2.8088	1.87828	1.67979	0.852685	1.92103	1.03296	2.45701
ACH-001735	SEMK2	SEMK2_HAEMATOPOIETIC_AND_LYMPHOID_TISSUE	0.131756	0.0900523	0.116918	0.344079	0.0945484	0.0658447	0.0851173	0.23674	0.188262	0.0961062	0.110264	0.254224	0.0516404	0.287387	0.0887832	0.152644	0.136184	0.233448	0.187361	0.226477	0.0702055	0.382666	0.143453	0.116779	0.10659	0.0547725	0.139173	0.173649	0.253934	0.0920101	0.0985238	0.235241	0.0923477	0.0183407	0.208764	0.0757359	0.0496405	0.107548	0.067824	0.078234	0.040846	0.0677549	0.150179	0.207397	0.358237	0.0733749	0.123016
ACH-001736	HB1119	HB1119_HAEMATOPOIETIC_AND_LYMPHOID_TISSUE	0.0654966	0.0328828	0.0384185	0.118194	0.0667237	0.0573965	0.109939	0.0866259	0.0891705	0.049369	0.0408405	0.0416757	0.0436912	0.0565487	0.0812073	0.113652	0.0936143	0.0708628	0.0568982	0.115387	0.0486414	0.0724422	0.0255698	0.0419989	0.0421191	0.0370253	0.0461045	0.0454346	0.0703704	0.0516819	0.0830442	0.170738	0.088856	0.0358513	0.0735948	0.0481626	0.0373084	0.0623035	0.0699459	0.047381	0.057557	0.0565923	0.0489197	0.0783229	0.0763399	0.0440327	0.0460999
ACH-001737	HSB2	HSB2_HAEMATOPOIETIC_AND_LYMPHOID_TISSUE	0.192282	0.0750182	0.427829	0.288138	0.113821	0.166283	0.0539213	0.0651374	0.0773555	0.0889948	0.155568	0.10414	0.428695	0.109303	0.0266683	0.0966108	0.35858	0.15979	0.0291772	0.180306	0.381529	0.131039	0.232817	0.0822992	0.146189	0.154458	0.168104	0.159996	0.110457	0.369539	0.0710523	0.108546	0.239634	0.0981122	0.0909245	0.505583	0.0607555	0.159516	0.367881	0.0931671	0.240781	0.135476	0.218624	0.455233	0.13872	0.0689056	0.131137
ACH-001740	RH28	RH28_SOFT_TISSUE	1.50821	1.2943	1.68244	0.817332	0.950839	2.44659	1.36549	1.18956	0.442479	2.8797	0.340629	3.82544	2.79531	1.99376	0.826505	1.10385	0.79221	2.42752	1.66869	0.802577	1.66322	0.975745	1.11197	1.69023	1.77637	3.27016	1.104	1.6029	1.70562	0.765762	1.41992	1.3532	1.02142	1.05916	1.8072	0.71707	1.32179	1.0219	1.87757	2.24389	1.23194	1.10974	1.24087	1.63686	0.966731	0.991562	0.461678
ACH-001741	RMS13	RMS13_SOFT_TISSUE	1.17074	0.478801	1.22415	1.04219	0.790677	1.35149	0.695248	1.78491	1.0318	1.68903	0.298757	1.13419	1.06431	1.8934	0.164219	0.465155	0.803371	1.96053	1.22622	0.833157	0.782298	0.566859	0.593688	1.4126	2.26843	1.36765	1.5305	0.535256	3.18876	1.45702	1.07703	0.858802	0.751799	0.45778	1.75854	1.15109	0.718048	0.562311	0.738245	1.59738	1.62309	1.60348	1.03754	0.659886	1.4032	2.33205	2.5542
ACH-001743	RC2	RC2_SOFT_TISSUE	2.19627	1.01744	2.92626	2.33009	0.760493	2.83734	1.73794	2.71841	1.4036	3.81301	0.450827	2.99145	2.2421	3.61428	0.32503	1.03631	1.11007	5.46883	2.39208	1.63253	0.929229	0.963862	1.57809	2.03322	3.27069	4.11274	2.9232	1.05314	3.73154	3.1613	1.70694	3.01382	1.39206	0.871953	2.86617	1.77237	1.36381	0.949042	1.03383	2.76149	2.16549	1.54265	2.09266	1.4737	1.94923	3.65963	3.51167
ACH-001745	RHJT	RHJT_SOFT_TISSUE	0.94048	0.704205	0.842006	0.831918	0.682934	1.372	1.09853	0.803261	0.61921	1.33076	0.126957	1.41899	0.679517	0.858964	0.368811	0.781566	0.637718	1.26264	0.547878	1.3997	0.73283	0.827772	0.707703	1.94286	0.770156	1.62359	1.95783	0.940998	0.877818	1.05554	0.664367	0.748063	0.589069	0.466944	1.12467	0.983711	0.52339	0.477367	0.784782	1.64167	0.777122	0.566699	0.836691	0.754531	1.50923	2.13092	0.591474
ACH-001750	TTC442	TTC442_SOFT_TISSUE	2.8035	1.56398	2.61371	2.59766	1.20265	1.65998	4.87625	3.00932	2.8363	3.41607	1.03839	3.20984	4.67604	2.97763	1.84025	2.35206	0.973709	2.91554	2.29149	1.98447	2.04879	2.47478	2.11032	4.08122	1.75705	4.92691	4.79807	2.06689	5.50473	1.17208	0.979791	2.57918	3.98723	2.64082	2.72089	1.89432	3.80989	1.005	4.03074	4.61338	2.04677	3.64235	3.39168	3.17949	6.2374	2.38341	3.939
ACH-001751	RH36	RH36_SOFT_TISSUE	1.90542	1.35217	3.07151	1.98106	0.523875	1.58868	2.81322	1.23171	2.07637	3.58425	0.43997	2.5991	3.13829	4.59029	0.802088	1.95911	0.467899	1.06778	1.49668	1.06982	0.966467	1.46238	3.01057	3.57174	2.05666	4.10607	3.27898	0.92716	3.88259	1.29372	1.48051	2.02654	2.30589	0.379301	2.49964	0.637229	0.987643	1.02244	1.3642	2.45117	2.07724	1.70781	0.430147	1.22537	4.9422	3.29497	1.96034
ACH-001765	RH4	RH4_SOFT_TISSUE	0.860617	0.386911	0.62154	1.00675	0.700548	1.49448	0.793788	0.711084	0.741233	1.10755	0.21478	0.977882	2.01054	1.19826	0.375156	0.93641	0.691488	0.869089	1.23656	1.16666	0.613693	0.448852	0.319579	1.40202	0.566003	1.28482	0.924132	0.597501	1.21697	0.324704	0.555906	0.967784	0.683264	0.490092	0.764867	0.779533	1.00886	0.51515	0.595779	1.24766	1.91176	1.46545	1.00075	0.647342	0.917531	1.43241	0.431985
ACH-001786	SNU1544	SNU1544_LARGE_INTESTINE	1.39988	1.8895	1.02412	2.70781	2.43682	1.06529	1.92716	1.51855	1.43416	0.96567	1.509	1.00941	0.830786	1.58089	2.60056	1.19439	2.01499	0.719618	0.858956	1.58104	1.19273	2.31919	0.733804	1.3474	1.28414	1.31722	3.52696	1.24898	1.00451	2.7341	1.29565	1.5407	1.35881	1.05272	0.975882	1.56738	0.651408	0.984693	0.592551	0.275601	0.38489	1.25716	0.702375	1.52606	2.62989	4.01984	0.965424
ACH-001790	RH18DM	RH18DM_SOFT_TISSUE	0.934442	0.675482	1.09819	0.747439	0.847678	0.510949	1.31252	1.23141	1.09831	0.781317	0.443425	1.10342	0.721965	0.869271	0.543728	0.952285	1.01664	1.22818	1.20058	1.57747	0.526292	1.40321	0.963847	1.14782	0.802492	0.928807	0.749311	0.557896	1.1846	0.232229	0.556965	0.986528	1.09646	0.28696	0.824646	1.20495	0.853255	0.634835	0.582974	1.01286	0.90286	0.485113	1.57542	1.60317	1.58681	0.925235	0.475803
ACH-001791	LPS6	LPS6_SOFT_TISSUE	1.57213	0.58984	1.19654	1.45465	1.88397	2.52355	0.617307	1.52338	0.864177	1.31965	0.575779	0.941535	0.351048	2.14777	0.598693	0.786664	1.74579	1.95894	0.960889	0.697593	1.06122	1.38017	0.891896	0.860008	2.0937	2.05487	2.04002	0.602191	1.60425	2.54092	0.92364	1.05186	1.21385	0.975085	1.61429	2.42919	2.98126	1.88783	2.22435	1.14627	3.23011	2.73443	1.17233	1.82745	2.14701	0.65223	3.89686
ACH-001793	LPS27	LPS27_SOFT_TISSUE	1.82224	0.460275	3.80273	1.43528	0.936404	2.41184	2.32822	2.00481	1.83855	2.55197	0.717757	1.35663	2.44726	1.83514	1.35215	3.01649	1.30115	2.07363	1.25895	2.0791	0.914337	1.64769	1.86178	1.73581	1.6955	1.33546	1.45341	0.722662	1.86496	1.41419	1.46036	2.52335	2.46299	0.38834	2.32267	1.32169	1.85808	2.57144	3.54649	1.51335	2.31901	1.2337	1.70282	2.29574	2.53891	1.12627	2.32246
ACH-001794	93T449	93T449_SOFT_TISSUE	4.78246	3.53977	5.47029	2.76205	6.20027	6.62111	4.16668	3.28978	6.11078	9.25194	2.09901	9.37899	4.82931	7.85327	3.95736	5.62629	5.04998	2.865	6.30925	6.11519	2.76589	7.32797	5.27588	3.31745	5.4335	5.51641	2.04803	3.32592	5.27443	6.93116	3.75408	3.82512	4.03234	4.2	5.94961	2.09115	7.16857	4.1274	6.0627	4.19229	3.49742	5.92614	2.35659	3.80489	3.57949	2.51441	5.87217
ACH-001795	94T778	94T778_SOFT_TISSUE	4.27272	5.11969	6.11917	2.01643	3.49129	4.98427	3.33966	4.01396	2.27956	4.91768	2.71877	4.44111	5.19399	4.21215	2.01324	4.96938	1.62891	6.4569	5.59436	4.71788	3.37866	4.25428	4.75302	3.59703	3.74901	3.36512	4.03448	4.47338	5.13914	3.77717	1.91989	4.31195	4.28204	3.42614	4.41711	2.75912	6.9768	3.42896	8.62609	5.06539	2.12696	3.98809	2.46947	5.86788	6.02753	2.68399	3.33984
ACH-001796	95T1000	95T1000_SOFT_TISSUE	3.24864	0.939827	4.12612	2.70576	4.20329	3.3974	3.86745	2.67458	3.53666	4.96563	0.837717	4.03092	3.41309	8.45411	1.74982	2.92966	4.32991	4.80732	1.88859	3.23403	2.18852	1.84135	3.52482	2.63138	2.80967	5.72737	2.28426	2.41826	2.8604	4.46975	3.73978	3.59448	3.75745	1.89864	2.71768	8.05462	2.59699	1.58895	4.50227	3.10181	4.89508	3.94776	1.78882	1.84262	9.853	5.08115	4.68488
ACH-001799	LPS141	LPS141_SOFT_TISSUE	3.01692	1.3845	4.03503	4.88101	2.65421	3.51788	5.07085	8.72134	2.42771	3.45811	1.0078	2.33885	2.90265	4.36111	1.28322	1.69196	2.40774	2.43398	1.90211	3.0876	1.54089	3.04261	2.66877	1.59374	3.42059	1.997	3.46355	1.65376	7.54704	2.40984	1.83942	2.84203	4.73698	0.741337	4.29192	1.61612	4.68551	2.55241	3.53294	4.57874	4.60521	3.20173	2.59607	3.36794	5.33478	2.42935	3.03008
ACH-001802	LPS853	LPS853_SOFT_TISSUE	3.45569	1.17476	1.96438	2.06855	1.43892	4.21601	3.58675	4.19744	3.1414	4.11062	1.85428	8.919	3.48501	5.64652	0.958273	4.48427	1.29691	1.85476	3.63869	1.85788	0.987373	2.81496	9.25756	2.74954	3.00932	3.9899	4.39251	1.27943	14.4142	1.46905	3.71895	2.89444	2.27042	0.701454	6.19856	0.979004	6.24292	0.925047	3.20648	4.68478	4.97843	4.85751	2.91128	7.03496	7.47258	4.68355	3.75872
ACH-001804	LPS510	LPS510_SOFT_TISSUE	3.33123	2.11595	5.93169	3.21803	2.39363	5.74256	1.76164	3.68841	3.35268	4.4779	1.00422	5.62789	2.79206	4.81144	2.75861	3.10442	3.74101	3.68849	2.77751	2.03054	1.93701	3.09853	3.80489	2.01807	3.09405	4.4592	3.03146	1.66083	4.44175	3.59161	1.86947	2.53779	4.1955	0.953502	3.18182	4.46674	3.96972	2.25728	4.10815	4.41048	6.76377	2.48369	2.20985	3.14981	4.47904	2.11433	5.51612
ACH-001807	LPS067	LPS067_SOFT_TISSUE	6.00843	5.59247	8.72109	9.69257	3.18525	5.36317	6.48584	5.30973	5.18021	9.35689	2.34056	11.3439	3.82474	7.60345	1.97744	2.08601	1.94229	4.28215	3.13009	5.88059	1.75224	3.44893	6.09462	4.25168	4.4061	8.5658	4.85947	4.2905	5.00374	3.99888	5.9394	6.08393	12.6319	1.24138	4.60827	3.82737	11.7726	6.33367	9.57238	4.98702	13.3978	4.75672	2.56597	4.16959	4.54311	4.05013	12.9096
ACH-001814	OS252	OS252_BONE	4.17584	3.33283	4.19104	6.46551	1.96201	2.91183	3.15322	2.9674	5.04064	6.24646	1.52227	6.19365	4.38004	5.12667	1.76069	0.878445	3.82504	5.33079	2.35316	3.32456	3.06399	2.63418	4.35641	2.66419	5.36326	5.31966	3.17297	2.69575	6.16212	4.11746	2.98552	4.44745	8.78664	2.22055	4.1686	3.22743	4.85524	4.49589	9.09188	6.00128	11.884	4.79529	3.79229	2.11558	4.45189	4.343	2.95832
ACH-001818	C396	C396_BONE	6.18022	4.56251	7.91899	11.7943	4.49882	8.21611	4.95602	5.12574	10.6114	7.89554	3.27381	5.67706	2.9762	9.59006	4.64564	3.78118	4.40735	4.60756	5.99048	6.15492	5.69675	6.42652	5.03302	3.20485	4.90533	5.61476	4.07698	5.24272	11.2889	3.37168	8.60908	3.76533	5.61122	3.62607	4.85731	2.9594	10.2324	9.87289	5.01399	4.36745	10.3115	4.41815	4.13745	4.57865	4.32411	5.24201	9.04276
ACH-001819	MFM223	MFM223_BREAST	2.98012	1.79719	3.83299	1.66492	1.34321	3.0326	1.11546	3.19596	3.69169	3.68768	1.96637	12.5453	2.82375	2.87828	4.24716	2.00628	3.79232	2.07308	7.35179	2.16857	0.431159	3.65466	1.8923	2.94703	4.39277	2.73105	3.07595	3.51238	4.02308	3.19341	4.25601	3.73714	2.15616	0.731573	2.56519	1.07874	3.08378	1.79249	1.42197	1.73222	1.50705	1.20634	2.35615	3.85976	6.20498	6.14708	1.28625
ACH-001820	COLO824	COLO824_BREAST	1.84012	1.18328	2.64667	3.3696	2.30833	1.30483	0.763792	1.18377	0.989666	1.26967	1.27244	1.61332	3.32168	2.0766	2.12549	1.36191	2.61324	2.20806	1.58499	2.52561	0.594447	2.68269	1.13228	0.681722	1.12672	1.16507	0.629604	1.48541	1.22389	1.43744	1.70449	3.92597	2.55378	1.28451	1.39404	1.32427	1.56061	2.42044	0.909048	3.02259	2.86412	1.71971	0.635569	1.58789	3.22701	0.935306	0.964242
ACH-001834	ICC10	ICC10_BILIARY_TRACT	3.65528	3.86734	5.06307	2.96288	1.54315	5.53481	7.31301	4.03104	4.36211	3.57347	2.60039	4.36206	3.83054	2.52325	4.80802	4.13118	1.9345	4.85591	5.42412	6.10109	0.622274	4.21949	4.34003	5.72732	2.96498	3.42035	2.3653	3.27989	5.23745	2.15414	2.20898	5.65307	4.95466	5.04154	4.54345	0.998388	3.9222	3.54693	3.03057	5.92943	1.04495	0.99229	3.71083	3.49234	5.83773	2.5276	1.75401
ACH-001835	ICC106	ICC106_BILIARY_TRACT	3.27437	2.43986	4.7585	3.17674	2.6289	2.56909	5.97442	4.01476	3.33661	3.62409	1.67667	5.09491	4.41516	2.52859	4.67761	2.71656	1.81049	7.4907	3.50064	2.69151	0.498735	2.20913	3.20562	2.94733	2.4038	3.23304	1.81712	3.5911	3.19422	3.03189	4.50788	3.93293	4.2453	3.09094	3.15705	1.64354	3.51322	3.7339	2.57282	5.3844	1.88778	2.56821	1.88199	2.37424	3.33915	1.68029	1.30114
ACH-001836	ICC108	ICC108_BILIARY_TRACT	4.68615	2.14961	6.81065	3.65942	3.85594	3.95245	5.08256	3.93865	2.48254	6.8164	3.34982	6.26279	12.4238	2.74444	7.45857	6.03475	4.55516	9.76627	5.59723	4.78742	1.16337	3.43868	4.5775	5.7898	5.12101	4.32402	3.40223	4.13593	4.67494	4.2339	3.00204	6.3367	6.49982	2.36263	6.3376	1.82625	4.37998	2.65942	3.92818	6.56776	2.68326	3.49365	1.8829	6.17229	9.17401	5.33732	2.29016
ACH-001838	ICC12	ICC12_BILIARY_TRACT	1.95397	2.22658	3.14536	2.04258	1.36659	1.46582	3.64071	2.58218	2.11669	2.54975	0.921611	1.01439	1.43156	2.03914	2.60355	1.40656	1.70531	2.91001	2.06727	2.66866	1.66996	1.92036	1.92887	2.44341	1.61028	1.22355	1.82346	1.76855	2.34469	1.38935	2.63922	2.05642	2.5799	1.61018	2.23739	0.951179	1.93605	1.39301	1.27086	4.17081	1.90404	2.42728	1.72561	3.30344	2.76699	1.46944	1.67387
ACH-001839	ICC137	ICC137_BILIARY_TRACT	2.61932	3.00829	1.22308	1.38847	3.01043	6.49863	1.10743	2.45583	3.29895	2.28666	2.16766	6.11916	2.92826	2.82679	1.85823	2.91854	2.44378	1.24799	1.901	2.48001	1.8588	2.64173	4.23784	2.44536	2.27592	2.97954	2.15931	1.77775	2.6446	4.76503	3.4392	1.67031	2.66176	2.35466	2.73376	1.98941	5.18406	4.26576	2.4984	2.6455	3.15739	4.60289	1.01073	1.83624	2.78905	1.29398	1.96267
ACH-001841	ICC15	ICC15_BILIARY_TRACT	1.63767	1.1563	2.39114	1.49283	0.964582	0.714205	2.9308	2.04063	1.62388	1.24492	1.12577	0.618842	4.45331	1.27544	2.27785	1.63081	2.52605	1.28122	1.78331	2.10414	0.833205	2.32448	0.978996	3.43733	1.64534	1.60409	1.33407	1.13167	1.35556	0.960882	1.54999	3.31559	2.08268	1.65253	1.60591	0.632482	1.99913	1.06917	1.524	1.94614	0.740164	1.30276	1.22227	1.91388	3.72956	1.24187	1.17011
ACH-001842	ICC2	ICC2_BILIARY_TRACT	4.25881	4.18107	3.16821	3.11567	2.69193	3.19254	4.39136	3.31916	2.92544	4.23979	5.93499	1.78884	4.83071	1.32157	6.51833	3.68486	4.32245	3.93057	2.48319	9.2518	2.96056	4.639	4.51676	4.09169	3.94023	4.48252	6.08714	4.20252	4.40437	6.09704	4.17012	5.16974	2.85455	13.347	3.02575	3.92608	3.55124	2.64021	3.69096	5.9184	2.92835	3.00279	3.64057	4.76266	4.7538	6.40033	2.448
ACH-001843	ICC3	ICC3_BILIARY_TRACT	1.09661	1.6636	1.19508	1.00265	0.502835	0.698727	1.10639	0.982388	2.17624	0.835732	1.02327	0.952692	1.38235	1.70435	1.62829	1.59413	0.66649	0.54342	1.14609	2.28757	0.45177	2.43344	0.422534	2.89193	0.642814	1.66648	1.02799	1.00912	1.08282	0.534031	0.65217	1.44783	0.541052	0.950529	1.04127	0.994643	0.82159	1.0498	0.760606	0.770334	0.648041	1.18608	1.35224	1.47578	1.15242	0.681055	0.707036
ACH-001844	ICC4	ICC4_BILIARY_TRACT	3.48897	4.1099	2.93683	1.45564	2.52831	5.33958	4.00147	2.98487	5.18191	3.2939	2.97197	3.95079	6.98697	2.05069	5.39815	5.55502	3.07088	1.8154	3.36451	6.38481	2.06565	2.82126	2.93386	7.40974	4.20887	2.94985	1.7053	5.46994	1.70529	3.64503	4.03611	5.44445	6.8515	2.86942	4.29991	0.934534	3.80767	4.9453	2.141	2.36545	2.50878	4.1478	2.93108	3.16901	7.0888	3.0916	1.43051
ACH-001845	ICC5	ICC5_BILIARY_TRACT	6.96734	6.75307	7.40608	6.89689	6.09214	7.64808	8.06297	6.80672	5.92505	7.31766	6.93842	7.2245	7.67825	4.69197	5.99737	6.61968	4.68621	12.0418	9.61087	1.88089	2.91172	3.52853	5.97097	5.70749	9.88655	3.76238	3.42725	10.9014	6.56442	9.76816	5.59876	9.81249	7.94946	3.56514	7.84254	1.42939	10.052	8.37094	4.77565	9.71567	3.32928	3.41435	3.16889	9.30851	19.3557	4.04774	2.96327
ACH-001846	ICC6	ICC6_BILIARY_TRACT	3.60848	4.06894	6.20791	3.96324	1.5861	2.89017	2.83039	3.69651	3.95352	3.33018	2.21731	2.47333	14.8403	1.72948	13.1706	4.05444	1.56404	6.32022	3.53829	3.00198	2.84438	3.47547	1.78707	4.79809	2.34767	2.16748	1.44619	6.10558	1.5653	5.27303	2.90437	5.90306	8.43281	4.89333	3.74649	0.66666	4.78645	4.55913	3.9017	2.50058	2.29099	1.78733	1.47101	3.23116	3.5511	2.85087	1.35302
ACH-001848	ICC8	ICC8_BILIARY_TRACT	2.8706	3.50899	2.10864	1.65783	2.29442	4.89688	1.82321	2.18887	2.86467	2.79109	1.64511	3.96795	1.56126	2.35877	2.19555	2.88536	2.19127	5.95895	3.87851	1.71058	2.10424	2.53723	3.16351	2.37494	2.40164	3.29623	3.77217	2.06855	5.54829	5.82169	2.86714	3.91872	3.00988	3.87428	4.54179	2.19153	3.93924	2.22732	2.77047	4.37872	1.93834	2.87391	2.40335	2.57186	4.25069	2.74392	2.53692
ACH-001849	ICC9	ICC9_BILIARY_TRACT	1.30106	0.879656	1.71859	1.18531	0.783437	1.14554	1.53603	1.11654	2.29315	1.3201	0.312153	0.988695	0.522088	1.57604	0.730276	1.24657	1.15697	1.29217	1.83936	0.361139	0.612467	0.895925	1.01056	1.50971	0.93192	1.2365	1.532	1.24492	1.68591	3.46154	1.6638	0.994186	1.52726	1.69889	0.760318	0.990888	1.33845	1.39403	0.885422	1.65112	1.38516	1.05328	0.616094	0.599476	1.62359	0.9722	2.51183
ACH-001850	G415	G415_BILIARY_TRACT	2.3395	1.68372	1.79279	3.53709	2.13081	1.598	1.35919	1.36474	1.78645	1.75433	3.54096	3.13842	0.543975	3.5668	5.0541	1.93798	3.48309	4.29495	2.85257	1.4623	1.72456	3.2356	2.70788	2.1242	2.3893	0.957162	1.79746	1.84252	2.52558	2.88726	3.56307	5.5751	2.10619	2.24889	1.5254	0.814139	1.09899	3.53932	1.14082	3.43222	1.73914	2.60383	2.31321	2.9029	4.21001	1.27031	1.90432
ACH-001852	HKGZCC	HKGZCC_BILIARY_TRACT	2.10648	2.26119	1.89672	1.84602	2.14209	1.43685	1.57868	2.28653	2.27486	0.813455	1.21777	1.73401	0.355593	1.70297	3.01723	1.11574	1.92866	4.23825	1.5758	2.99757	1.63178	1.37621	1.33199	2.4023	1.54945	1.81414	1.5024	2.97575	0.865509	1.88177	3.31733	2.25966	2.56985	1.79582	1.2104	1.85868	3.31824	2.01076	1.76237	4.54595	0.948839	3.18547	1.49911	3.00028	5.08855	1.40876	1.94161
ACH-001853	KMCH1	KMCH1_BILIARY_TRACT	2.47389	2.53017	3.55665	2.1302	1.93155	1.47492	2.71113	2.28117	1.81121	2.99525	1.91346	2.73075	4.94088	2.57209	5.2837	2.43711	2.559	1.43244	1.78116	5.37074	2.67186	2.80122	1.61179	2.88402	3.67124	1.0409	2.57068	3.91195	1.56861	3.94455	4.96648	6.24913	4.11252	4.73198	1.9154	1.28265	1.38961	2.52068	1.95105	1.60393	2.3315	3.37651	2.44539	2.60107	2.90717	1.38664	1.26673
ACH-001856	RBE	RBE_BILIARY_TRACT	2.92322	2.28349	1.59737	2.66504	3.32095	2.53138	2.15632	2.51844	2.42244	2.40917	2.32311	1.79959	2.71908	2.25707	6.51751	1.65658	2.50792	2.39959	2.89998	3.1917	1.68328	2.76593	1.97544	3.61705	4.85255	1.74612	1.73473	4.09401	1.93515	2.10184	1.99388	1.83712	3.18596	2.80445	2.22469	0.788869	4.96011	2.80797	2.04098	2.01318	3.35687	2.25786	2.15095	2.481	25.5735	1.21003	2.32032
ACH-001857	SG231	SG231_BILIARY_TRACT	1.51478	1.34923	1.29814	1.41095	1.26333	1.30374	2.02789	1.39261	1.55137	1.29505	0.823719	1.31247	1.73528	0.584166	2.78071	1.39779	0.78883	1.02182	1.4972	2.66265	2.41033	1.71886	1.16097	2.2357	1.17345	1.5011	1.52891	1.8915	1.1839	1.48741	1.76757	2.24197	0.967749	2.23739	2.18682	0.664753	1.33702	1.75174	1.02438	1.49285	3.33823	1.60402	0.772152	1.24138	2.9197	1.28727	1.5266
ACH-001858	SSP25	SSP25_BILIARY_TRACT	3.93494	3.2682	3.86225	2.9254	3.92834	3.66122	3.68935	4.14293	3.44841	3.63793	2.46604	4.89499	3.85461	6.35355	5.85877	5.63218	3.89317	5.2379	3.28939	3.91556	1.80323	2.98462	4.20642	3.51937	5.29871	2.78744	2.11091	3.72372	3.35571	2.46973	2.35043	4.80101	6.82862	1.50889	4.13868	2.2072	4.69575	3.44873	5.49377	4.07419	3.07429	6.14002	4.17359	3.93026	4.30874	3.32314	4.41486
ACH-001861	TGBC1TKB	TGBC1TKB_BILIARY_TRACT	3.86974	5.26681	5.82532	3.47316	2.70787	2.93423	9.86099	3.97177	2.51191	5.20163	3.99856	3.33762	2.39073	2.45784	4.11075	3.9661	2.45104	11.49	3.25336	3.20173	2.8853	4.98023	2.93245	5.04144	5.05891	2.89403	3.6007	9.65128	4.24815	6.02935	7.32192	5.03094	4.53593	4.11624	1.7204	2.64598	2.85164	2.95011	1.82851	6.97936	0.860718	2.32063	1.77009	4.1813	5.92899	5.1741	1.17769
ACH-001862	TGBC52TKB	TGBC52TKB_BILIARY_TRACT	3.26789	3.18771	2.44794	4.6625	4.63347	4.10317	3.45065	1.95476	4.40035	3.81168	2.57772	7.76043	2.11105	2.31399	7.79442	4.22997	1.60715	2.27256	4.03899	1.75242	3.04193	2.33338	3.89818	1.79883	2.62192	2.56299	1.68284	3.63615	1.9016	4.37886	3.46746	3.11685	4.32811	2.45128	2.5903	1.6619	2.11735	2.42777	3.78688	3.33601	4.27824	2.75977	2.2471	3.33388	1.71242	2.83301	4.24553
ACH-001863	TKKK	TKKK_BILIARY_TRACT	3.14556	1.7587	4.73832	2.28921	3.39945	3.4276	3.92463	2.06291	3.16466	4.69325	4.98598	2.05027	0.72166	2.02013	7.83225	2.84437	3.18971	3.75797	3.49382	3.32906	1.26758	2.85254	1.33194	3.66282	4.74532	1.72167	1.42606	5.56219	1.91561	4.47631	8.0215	2.21522	1.79007	2.20701	2.99378	2.42295	2.53734	2.48778	0.736463	1.31847	2.88028	1.97562	0.267079	9.04359	5.88017	2.64121	0.79576
ACH-001864	YSCCC	YSCCC_BILIARY_TRACT	4.34157	4.36541	2.30648	3.03862	3.40889	6.29329	9.67569	6.27406	3.61495	4.42908	5.00274	3.73044	4.18574	1.95558	9.88583	4.66436	5.8164	3.45254	4.22509	8.2412	2.36315	16.4904	2.56269	4.0549	4.60288	2.27252	2.29027	8.31656	3.99377	5.02677	3.58687	5.40104	7.83255	3.63038	3.11219	2.0625	3.0599	5.08982	2.81591	8.20068	1.59936	3.91756	2.58715	11.2949	5.86215	4.87214	1.08567
ACH-001959	CCLP1	CCLP1_BILIARY_TRACT	1.02869	1.21174	1.98748	0.683261	0.480927	0.660803	0.879865	0.84663	0.941527	1.07334	0.53967	1.20875	1.82406	0.939882	1.17141	1.33288	0.722433	2.48709	2.54037	1.80467	0.742542	2.74326	0.993961	2.66888	0.704578	1.63317	0.605733	1.23762	0.670396	0.523166	0.579228	1.67759	0.337897	1.03428	0.894245	1.02515	0.914616	0.916305	1.32235	1.64216	0.171471	0.431771	0.87322	1.32916	0.962	0.176823	0.569415
ACH-001960	CCSW1	CCSW1_BILIARY_TRACT	1.82693	1.86254	0.910224	1.78488	2.68296	1.13592	0.377636	1.10212	0.40901	1.16611	1.57315	1.43065	1.22209	2.12364	1.31813	3.02381	3.8707	3.18058	1.20591	2.03836	1.02481	0.951667	1.10254	1.13052	1.75295	1.27898	1.30962	1.52309	0.924081	2.70972	1.64177	3.1668	1.29738	1.42924	1.52166	1.18308	2.4657	1.1875	1.64611	1.77572	1.78759	2.17023	0.365058	2.01176	3.79883	1.10453	2.58535
ACH-001961	GB2	GB2_BILIARY_TRACT	4.59641	2.82709	5.20925	1.82517	3.5062	6.56441	8.8754	4.8217	7.57089	7.05555	2.10267	9.23446	6.4835	3.96324	6.43537	5.4686	2.70656	3.20259	3.77073	6.56395	2.07988	4.05256	4.7086	5.43106	3.35231	4.73025	1.17049	7.49256	2.6305	3.59762	5.53143	4.2688	8.24459	3.44591	3.74848	1.6821	4.15714	2.56399	5.48637	3.4997	3.3017	6.73079	3.29511	4.28028	6.99909	2.29516	4.85795
ACH-001991	NZOV9	NZOV9_OVARY	1.87929	1.56263	2.52585	7.42327	1.61598	0.406449	2.62103	1.01532	1.53618	2.87925	0.724816	3.33499	2.82889	2.22668	0.769985	1.42465	0.919992	3.65593	1.43413	2.46201	1.13982	1.16928	2.3738	1.87389	1.09927	3.80827	1.89091	0.75648	2.41725	0.981537	2.1888	0.663045	1.20377	1.408	1.77955	1.29372	1.95126	0.987198	2.33182	4.48511	4.33216	1.65676	1.88466	3.38022	0.727909	0.620061	1.88985
ACH-001993	NALM16	NALM16_HAEMATOPOIETIC_AND_LYMPHOID_TISSUE	0.212223	0.118977	0.424966	0.341494	0.173802	0.159638	0.159481	0.247367	0.113882	0.303696	0.0678398	0.194429	0.186625	0.311399	0.181833	0.24072	0.424794	0.209602	0.229102	0.415138	0.192319	0.53803	0.442433	0.301584	0.219386	0.25375	0.058752	0.248141	0.292334	0.146077	0.103174	0.466967	0.314209	0.0473758	0.137615	0.187386	0.142985	0.220981	0.201512	0.146966	0.299904	0.106851	0.249475	0.10487	0.347377	0.104801	0.0747265
ACH-001997	ECC2	ECC2_BILIARY_TRACT	5.20201	8.19166	6.4044	7.23896	3.02071	3.06383	5.95289	2.22145	2.95667	11.7691	5.07828	5.4138	12.8384	4.09836	9.33604	2.83781	5.38896	4.04199	3.25239	7.9086	3.8696	3.91297	5.86442	12.7749	6.63005	4.78408	2.91405	7.30296	2.86136	9.14934	6.74375	8.84844	7.18406	3.85706	3.97513	2.89556	2.13106	3.79757	4.13635	6.1606	1.71341	4.7238	3.91191	7.43375	5.35077	2.18449	2.40634
ACH-001999	9505BIK	9505BIK_PANCREAS	1.73118	1.24834	2.03524	1.7283	1.55432	2.56203	2.3376	1.1127	3.27897	2.78338	1.00598	1.46291	1.36895	1.22817	4.30441	2.92576	1.28453	1.87191	1.99912	0.899633	1.91852	1.52754	1.08596	2.01251	1.096	1.81346	1.94532	2.59354	1.60205	2.60071	3.54837	1.40834	1.87346	3.02852	2.36633	0.643336	2.0916	2.09811	0.979242	0.954797	1.4704	0.960844	0.920535	1.57025	1.9258	1.38485	1.32532
ACH-002001	A375SKINCJ1	A375_SKIN_CJ1_RESISTANT	1.24758	0.811631	0.885755	1.28837	1.04593	0.709551	1.70418	1.72457	1.77532	1.53337	0.615978	0.857866	0.830026	0.948015	1.72118	1.30885	0.860297	0.746819	1.13877	1.18525	1.53836	0.933667	0.79234	1.69658	0.988944	1.43499	0.952029	1.58853	1.03142	0.71475	0.369668	1.21135	1.62498	0.820387	1.07317	1.00115	1.89359	1.05488	1.25493	2.02559	1.18002	1.04438	0.916283	1.96352	3.0365	0.745191	1.07148
ACH-002002	A375SKINCJ2	A375_SKIN_CJ2_RESISTANT	1.35446	1.44239	0.946004	1.46222	0.965668	0.956608	1.8754	1.70928	1.01509	1.56346	0.591266	1.05654	1.04074	0.678571	0.875852	1.35297	1.19123	1.60655	1.91628	0.904563	0.64478	0.454744	1.08832	1.1351	1.43826	1.13439	2.19247	1.19743	2.22245	0.957338	0.595135	1.66001	1.35104	1.16163	1.33187	1.5056	2.18881	1.03712	0.607573	2.32647	1.39444	1.0324	0.790035	3.05101	2.49025	2.24724	0.883486
ACH-002003	A375SKINCJ3	A375_SKIN_CJ3_RESISTANT	1.35059	1.08307	1.03697	1.19449	0.844593	0.794118	1.99681	1.89593	1.695	1.51927	0.808229	1.01743	1.10048	0.927614	1.37399	1.26968	0.813776	0.806873	1.15909	1.04289	1.83648	1.08403	0.917158	1.74396	1.01137	1.45976	1.34672	1.16421	0.882012	1.12051	0.390551	1.26209	2.29294	0.782595	1.09807	1.1569	1.58605	0.920514	0.645491	1.8392	1.40453	1.44387	0.971464	2.60936	3.03123	1.2303	0.538753
ACH-002004	UACC62SKINCJ1	UACC62_SKIN_CJ1_RESISTANT	1.56998	2.80501	1.1379	1.31802	1.28389	1.70751	2.13503	1.78118	1.15538	1.33055	1.09889	0.777052	0.7954	0.805856	2.5197	0.23765	1.65321	0.91525	1.41771	4.9145	1.05003	2.66125	1.01017	1.53734	1.10844	0.995097	2.16913	2.21345	0.6403	0.463322	1.06927	1.50616	1.95522	2.44424	1.40453	1.7251	1.41943	0.668535	1.02025	2.39586	1.48018	1.43978	1.67714	3.51253	2.94503	1.25589	1.11464
ACH-002005	SKMEL19	SKMEL19_SKIN	1.91898	4.96872	1.50017	1.53183	2.42501	1.86003	2.04193	1.70904	1.85547	1.69575	2.41459	1.9688	0.997492	1.10649	2.0987	1.22997	1.80865	2.46636	1.50458	1.67138	0.508341	1.32591	1.12554	2.18379	0.89095	1.68741	1.40692	3.36766	0.878131	1.30798	1.48375	1.66438	2.79495	4.1259	1.3907	1.40953	1.44086	1.32863	1.94066	2.25709	1.22013	2.22307	0.782327	1.68965	2.46283	1.50947	1.40342
ACH-002011	MP46	MP46_UVEA	1.4187	2.00155	1.00081	2.22234	1.91289	0.95328	3.05564	1.1321	1.07221	1.08047	2.3762	2.10963	1.50286	1.29818	1.83928	1.16735	1.5126	0.793	1.45534	1.36422	1.0157	1.1915	1.14372	0.889489	0.808656	1.72155	1.1318	1.60689	1.19819	0.940778	1.52311	1.62843	1.42559	0.917016	1.14761	1.89491	1.19266	0.703296	0.499969	2.09878	2.22784	1.36267	1.45873	1.44602	2.06924	1.88997	1.58151
ACH-002015	MEL285	MEL285_UVEA	1.59838	2.28716	1.48665	1.82129	0.699908	1.67043	1.85965	1.38704	1.78048	1.73952	0.697071	1.61745	0.766487	1.60626	1.43929	1.70564	0.690149	1.35264	1.75	3.59867	1.25884	2.35324	1.71044	2.0079	1.43556	1.79768	1.8184	1.33658	1.59498	1.55763	1.24431	1.51419	1.21246	2.42081	1.1148	2.33564	1.5223	1.11993	1.1861	1.4634	0.707247	1.16472	2.22744	1.46946	3.35276	1.02639	1.28817
ACH-002016	MEL290	MEL290_UVEA	4.03193	7.32492	4.69806	5.67529	1.81476	4.36299	3.58767	1.55396	4.95633	6.31081	2.08656	7.35337	2.05222	2.82291	4.86691	1.00726	0.881253	2.43324	3.1319	4.79624	2.0247	4.34816	3.56748	4.05362	4.06021	4.65587	2.56075	1.69604	2.40083	10.1929	3.98892	4.40997	3.30275	4.06826	2.35522	2.77086	3.87343	5.51719	2.69902	4.9953	2.02629	2.27423	2.39598	3.33873	4.70624	1.39333	3.7775
ACH-002017	OMM1	OMM1_UVEA	3.00599	2.41443	1.36965	2.05602	3.57353	2.09464	8.02075	1.68636	2.8499	5.0731	1.90259	5.39496	1.76108	2.06219	2.12232	1.92886	2.77615	1.55982	3.28966	1.08411	1.80817	1.46616	4.58098	2.72832	1.7341	3.54232	0.827324	6.71193	4.19157	2.47067	3.33536	0.95653	6.78144	4.83531	1.94366	0.996973	2.67491	1.85372	1.5157	7.82101	2.8478	4.92845	0.61305	1.03678	3.36565	6.26893	2.86574
ACH-002018	OMM25	OMM25_UVEA	2.10719	3.15078	1.27598	1.88851	1.55366	1.40481	2.95477	3.05688	2.10028	1.43539	2.59287	2.08589	0.478855	1.79468	2.75429	1.24586	1.48225	1.6508	2.23925	2.83873	1.15911	1.93369	1.23237	1.70255	1.75706	2.12065	1.15614	2.65633	1.51491	3.29525	1.99304	2.05798	3.20246	1.86342	1.33911	0.960093	3.06949	3.64228	0.651367	3.16711	1.11317	1.81864	3.17691	2.22412	2.88575	0.565161	1.91825
ACH-002019	HOKUG	HOKUG_CERVIX	1.93729	2.22776	2.48739	4.16005	1.81146	1.72845	1.85024	2.18176	1.82049	1.50103	2.05917	1.72011	0.625961	1.91504	3.02164	1.63305	1.60545	3.24277	1.77451	2.57577	2.10519	2.43152	0.826123	1.09715	1.15872	0.707404	1.76448	2.6578	2.12655	3.58534	2.77101	1.75841	1.47029	2.03983	2.26313	0.88396	1.28127	1.14494	0.807229	2.38809	2.79315	1.62322	1.12564	1.94905	1.34613	0.751948	1.31366
ACH-002022	PMFKO14	PMFKO14_LARGE_INTESTINE	1.41862	1.54211	2.04134	2.35225	0.361149	1.0501	1.10016	2.05834	1.73264	0.475539	0.960958	1.79887	1.20196	1.30442	0.799826	1.4677	0.790536	1.69756	0.961197	2.06239	1.03751	1.92711	0.72066	2.87287	1.77613	0.957345	1.03708	2.83108	1.251	2.18395	1.74137	1.70311	1.85062	1.61747	1.51964	0.660949	0.88014	1.16658	1.13781	1.10235	1.27572	1.33652	1.84884	1.57701	2.07396	1.09044	0.883763
ACH-002023	TGBC18TKB	TGBC18TKB_LARGE_INTESTINE	4.1464	2.03745	8.40839	6.80856	1.13195	3.19935	5.79516	2.70077	3.82353	6.1247	2.87287	3.97269	6.5585	3.20354	3.76139	3.7388	2.42095	8.60258	3.6632	9.41209	3.27088	3.67184	3.32504	11.4056	4.05089	4.26292	1.82347	6.76291	2.47895	3.67305	4.78089	6.41005	8.05285	4.50439	2.01864	0.836354	2.2102	2.918	4.12348	5.00796	2.22984	3.05434	2.71907	4.38225	6.76679	1.74825	2.06045
ACH-002024	ECC4	ECC4_LARGE_INTESTINE	2.1059	2.46073	2.04503	1.37227	2.30789	1.04066	2.82735	1.66743	1.65741	2.98795	1.93433	2.29214	2.43295	1.15738	2.08665	0.973891	1.19636	4.67137	1.94953	2.54366	0.680635	2.03957	1.91908	1.29352	1.35094	1.37228	3.03876	1.60025	2.29236	2.13817	3.12527	2.24105	1.92075	1.20492	2.08048	0.786157	1.59518	0.991337	2.60413	4.64702	3.59338	2.75658	1.94597	2.23892	2.34549	3.82761	1.1387
ACH-002025	TT1TKB	TT1TKB_LARGE_INTESTINE	3.39387	2.32515	2.75116	4.39874	2.14063	2.94712	4.71438	2.87561	4.93173	3.66253	1.74772	4.25944	3.26701	5.33565	3.03527	2.08856	2.80934	2.05723	3.44902	4.0891	1.58024	3.86574	2.58138	2.62605	4.70492	2.77932	3.28831	2.40945	4.35591	3.26804	6.80923	2.31198	3.93885	1.67386	2.74958	0.875525	2.38758	2.74697	2.5838	3.53528	4.34114	4.83391	1.85792	2.96137	3.98077	3.40576	5.19267
ACH-002026	HHUA	HHUA_ENDOMETRIUM	2.1612	0.993714	4.57992	3.38245	1.10385	1.19365	0.994628	3.5241	1.4076	1.50386	0.97988	2.20233	1.829	1.44798	1.3026	3.93062	1.86363	3.27775	2.05291	2.41608	2.51205	5.76017	1.63922	4.30204	1.15323	0.887416	1.15157	2.93653	2.47865	1.93258	0.979484	1.51359	1.8921	0.839999	1.8287	1.01426	2.4433	0.924339	2.79021	2.92229	2.23891	2.1165	1.70898	4.29369	4.42882	0.547516	1.7551
ACH-002027	HOUAI	HOUAI_ENDOMETRIUM	1.78322	1.24031	1.68073	1.09769	1.25721	1.3056	1.99654	1.54653	1.42152	1.80409	0.644701	1.18004	2.93197	3.04426	3.97753	2.58897	1.17426	1.2757	1.50563	5.03533	3.33394	2.14478	1.95337	2.42679	1.29849	1.43086	1.51925	1.3617	1.39736	1.48782	1.67292	3.82756	0.989493	2.75098	1.55961	0.421809	1.20252	0.80939	0.788941	0.786047	4.28158	2.61363	1.24873	3.80601	2.17234	0.848108	1.79579
ACH-002029	SAS	SAS_UPPER_AERODIGESTIVE_TRACT	1.46348	1.26792	1.74293	1.66456	1.0604	0.32414	1.20839	1.0597	1.31393	1.11516	0.819908	0.96999	0.629183	1.51067	0.83636	1.24178	0.525068	2.62275	1.40945	1.25721	1.86834	0.653109	0.826185	2.15091	0.789344	1.34167	1.1299	1.71118	1.84346	1.08302	1.19124	1.07937	1.36804	1.52321	0.630572	1.3802	1.67114	1.55697	1.77345	4.24378	0.994291	1.71443	0.854486	1.13342	1.92902	0.713984	1.48257
ACH-002038	HSKTC	HSKTC_OVARY	5.96541	5.85531	7.4767	4.47206	3.34563	7.58943	2.01141	5.50391	5.31217	4.87634	1.56882	14.1928	16.1287	4.04751	15.9707	5.28035	3.09852	7.41934	3.07495	12.3996	3.70722	4.66163	5.12208	9.36469	3.36609	4.89624	4.52232	7.37508	0.949552	8.82525	11.7019	9.71483	10.9711	2.7614	5.79566	3.55234	3.18184	4.60457	7.50567	6.07195	4.25976	11.4444	5.12791	9.7211	4.69742	5.46901	3.1632
ACH-002039	PK8	PK8_PANCREAS	1.88572	2.43417	2.95785	1.95587	2.87983	1.44712	1.17321	1.97819	1.11321	1.65766	1.47122	1.50602	1.08464	1.14735	1.86657	2.68446	2.22906	2.27031	1.37733	2.48057	1.07438	1.78329	1.2345	2.51928	1.07074	2.18565	1.67926	2.35656	1.97542	2.51961	2.05759	1.71685	1.14584	1.64809	1.25312	2.94288	2.37392	1.52931	1.06276	1.98132	1.59314	2.72745	1.35849	3.40685	1.93382	1.00109	1.04416
ACH-002041	HOTHC	HOTHC_THYROID	3.67869	3.62017	2.58166	1.45024	2.30808	3.40628	1.64573	3.20906	4.6173	2.56288	2.90519	3.89672	0.87996	4.53558	3.14855	1.96887	1.91597	4.97544	1.71242	2.46839	1.72418	5.59669	3.79811	3.76597	6.43237	2.1497	1.88662	2.11582	3.88018	4.25847	3.0916	3.72537	5.1005	3.66138	1.91878	2.8224	3.95018	3.53573	3.63145	5.78054	2.20551	5.31713	2.02177	3.50887	18.0404	1.46642	3.64991
ACH-002042	T3M5	T3M5_THYROID	0.98761	2.12576	0.59614	1.65188	0.820799	0.617668	1.32089	1.36458	0.701649	0.910778	0.72486	0.764394	1.17504	0.949611	2.60088	1.3161	0.639918	0.724623	0.772529	2.45924	1.13396	1.19431	0.985834	0.768544	0.691956	0.462852	0.997853	0.718089	0.87891	0.23495	0.766427	2.13252	0.772319	1.02978	0.592957	0.768542	0.453346	0.291423	0.346922	1.37799	0.911199	1.64531	0.652954	1.24779	1.29032	0.719506	0.465767
ACH-002044	HSQ89	HSQ89_UPPER_AERODIGESTIVE_TRACT	1.55355	1.5964	1.34161	3.5787	1.82447	1.02758	1.52655	2.16723	1.8305	2.09153	1.42907	3.90831	2.66113	2.25167	1.34766	1.50154	1.35132	1.07278	1.24918	3.30374	1.66821	1.70426	2.64228	0.717838	1.06037	1.38133	1.8988	0.418306	2.52452	0.772305	1.67047	2.41323	0.808971	1.42434	1.32963	0.970866	1.44763	0.901927	2.0621	2.0394	1.48669	1.94692	0.688591	2.7494	1.99815	0.620511	1.48394
ACH-002045	HO1U1	HO1U1_UPPER_AERODIGESTIVE_TRACT	1.70398	1.01553	1.52179	2.22979	1.14862	1.3108	1.23062	1.3728	1.36833	1.45019	0.646691	1.59534	1.80231	2.50969	2.12053	3.14604	1.3054	1.32074	1.27638	2.52105	0.860545	1.5026	1.19427	2.55786	1.23048	1.90525	1.42751	2.53142	1.44113	0.881932	2.40843	1.7027	0.808936	1.25018	1.82364	0.81172	1.61647	1.39904	1.46953	1.89655	1.95162	1.38791	1.23446	1.45903	2.05157	0.538071	1.81309
ACH-002046	HTMMT	HTMMT_ENDOMETRIUM	4.32813	4.91486	5.88734	3.18799	2.22292	3.83191	7.76236	4.75837	3.42454	6.02011	2.74673	4.51063	3.68022	3.59918	7.72764	4.88619	1.38172	4.47693	4.0241	2.08964	2.58443	4.50774	7.28623	5.70024	2.34475	4.35778	5.13842	4.03121	6.42623	3.15118	3.11579	2.2935	4.67761	3.37229	5.67573	1.37387	4.09374	2.91994	5.28042	7.04915	4.09598	5.91858	4.97757	3.79717	3.10625	3.05968	3.61128
ACH-002059	P30OHK	P30OHK_HAEMATOPOIETIC_AND_LYMPHOID_TISSUE	0.0960722	0.0780493	0.0779663	0.240905	0.21857	0.0907005	0.284995	0.100764	0.134401	0.104575	0.0578632	0.207991	0.0667378	0.20679	0.116393	0.142257	0.157619	0.0811893	0.11866	0.115574	0.066062	0.245305	0.0879421	0.0424235	0.0935501	0.0654277	0.0605501	0.0974199	0.179061	0.118089	0.158946	0.0833147	0.0446189	0.0803401	0.0571226	0.0178817	0.0765943	0.138252	0.101199	0.113341	0.0584956	0.123799	0.132005	0.132381	0.130611	0.0591801	0.126849
ACH-002062	SLVL	SLVL_HAEMATOPOIETIC_AND_LYMPHOID_TISSUE	0.281293	0.168125	0.0849754	0.211822	0.423292	0.312145	0.89779	0.189221	0.399113	0.385239	0.510366	0.733822	0.240259	0.213171	0.207753	0.111695	0.219644	0.0998127	0.358732	0.433749	0.16633	0.293311	0.236169	0.137067	0.270867	0.214425	0.222914	0.467252	0.280797	0.353927	0.545153	0.0560655	0.128307	0.154566	0.26536	0.223221	0.240918	0.136648	0.0950996	0.200768	0.465673	0.45627	0.13602	0.352705	0.412849	0.339894	0.370457
ACH-002065	HSPSS	HSPSS_CENTRAL_NERVOUS_SYSTEM	2.69009	2.87615	2.9311	1.72895	2.19228	2.26583	1.97246	1.10685	2.8351	4.5082	2.35447	9.22434	2.85487	3.71304	2.85522	0.865581	2.95608	1.93827	1.68947	1.83002	0.690313	2.46796	5.31873	1.47068	3.57817	3.93527	2.79349	1.60565	3.44956	1.76765	2.25063	2.18213	2.46617	1.33904	2.37366	2.11581	3.12583	2.07904	3.72763	1.97567	3.44679	2.6952	1.49715	5.0412	3.0797	3.56159	3.93529
ACH-002066	HSSCH2	HSSCH2_CENTRAL_NERVOUS_SYSTEM	2.43911	3.27702	1.52498	3.31326	2.41389	1.32214	2.45266	1.92486	1.19589	2.88996	2.26772	1.88852	1.21354	1.31715	3.05947	3.33015	1.76984	1.73236	0.773994	1.86015	2.55786	1.52595	1.3233	2.67916	4.98105	1.62104	0.914244	1.93008	1.30848	1.63459	3.06762	1.8484	8.64466	2.41296	1.8519	1.08532	1.3258	1.79529	2.38935	1.57136	3.66455	3.8616	1.98522	3.52504	4.28699	5.3797	2.01973
ACH-002067	NOS1	NOS1_BONE	3.08372	2.58068	2.61792	4.87911	1.16093	2.5213	4.31462	3.37733	6.797	5.31412	1.81621	5.31395	2.62775	2.51869	1.7977	1.18118	0.937583	4.84935	1.90086	3.9124	1.46488	5.93827	2.53674	2.76764	2.92134	4.85683	1.45828	2.29678	3.61651	1.9433	5.09072	3.40618	2.6425	1.5862	3.34948	1.47024	3.28555	2.37529	5.24732	3.53933	3.1353	2.35269	2.02535	6.86607	1.82164	0.823357	5.44154
ACH-002069	HSOS1	HSOS1_BONE	1.16685	1.09449	1.55292	2.99475	0.682327	0.663019	2.19878	1.75028	1.97166	2.12209	0.991728	1.72442	1.51459	1.44677	1.65365	1.29008	0.455017	1.15533	0.840699	1.47688	1.89188	2.68713	1.00346	1.68841	0.834512	1.60118	1.06771	1.06604	1.88748	0.801337	1.20291	1.84685	0.860769	0.821161	1.57821	0.310106	1.30475	1.0825	1.21026	0.585877	0.866147	0.485628	0.624922	1.87614	1.04855	0.320111	2.21081
ACH-002446	CCLFUPGI0005T	CCLFUPGI0005T_STOMACH	3.3578	2.56283	2.53103	3.48267	2.5811	4.9087	4.07678	3.5708	3.23985	3.63085	1.35285	3.22698	4.68398	3.67839	4.74972	2.09899	2.52054	1.50721	4.07977	1.87103	5.62417	2.29213	3.72143	2.68366	3.05875	4.24975	5.03837	2.00369	2.01472	5.75284	2.21022	2.48821	4.55107	2.18221	4.78636	2.45356	3.48129	4.20895	4.59793	3.26425	8.41752	11.1805	2.15076	2.79817	4.01237	6.1218	2.82949
ACH-002458	HT144SKINFV1	HT144_SKIN_FV1_RESISTANT	3.20322	2.1059	2.47587	4.34085	1.6503	2.0246	3.56889	4.03146	3.94165	4.40336	3.50646	4.29747	2.41952	3.66116	2.664	1.21656	2.07017	1.16136	3.88674	4.51058	3.17136	3.5329	2.90499	3.4774	3.57868	2.86115	6.41586	2.87881	2.39082	2.23679	1.99683	7.11332	4.52663	3.23234	4.40823	1.38336	2.05601	2.10124	4.00766	2.48357	5.92413	3.89232	3.08023	3.5876	2.18245	5.16739	3.84542
ACH-002459	HT144SKINFV3	HT144_SKIN_FV3_RESISTANT	3.39522	2.14661	3.00356	1.98285	2.68523	2.47932	3.12418	5.13705	4.38495	4.7212	2.40128	8.64369	2.59327	5.3273	3.01462	3.26374	2.75237	1.57157	4.07821	4.52984	3.15938	6.6451	3.17908	2.39379	3.97126	3.06087	4.53152	2.15823	3.74589	2.82025	3.31011	3.97483	4.46139	2.89982	3.45991	1.53936	2.13469	1.51087	3.16185	1.59141	10.9969	5.58127	1.33482	2.97068	2.56369	5.65461	5.27172
ACH-002460	HT144SKINFV2	HT144_SKIN_FV2_RESISTANT	2.93833	1.45637	2.4164	2.39438	2.43488	2.357	3.28078	4.56999	4.43388	3.61997	2.61037	4.86291	2.53936	2.56893	1.90322	2.30947	2.01832	1.11487	2.82045	3.84406	2.45659	2.97395	2.26204	2.3186	3.07118	2.66447	3.2669	2.2945	2.24704	2.70325	1.93927	4.77716	6.46308	2.5695	3.16828	1.30048	2.97918	2.51678	3.26819	2.20578	7.4615	5.54638	2.23981	3.73215	2.8797	4.17113	4.26208
ACH-002461	RVH421SKINFV1	RVH421_SKIN_FV1_RESISTANT	3.43903	5.81221	3.04372	3.952	2.96122	1.66453	3.71899	2.98658	4.20823	4.02649	3.71593	6.47397	3.55789	4.46562	4.69959	1.43758	3.47173	1.17683	1.75343	4.49551	2.74118	2.22575	5.94351	1.39483	4.29722	3.02466	6.22735	2.44179	3.54288	3.30643	3.56719	2.5232	5.03312	2.0809	4.14744	1.74076	1.618	1.65969	2.7658	5.54444	3.96044	2.05	1.65936	2.66563	6.9086	6.98642	5.7517
ACH-002462	RPE1SS48	RPE1SS48_ENGINEERED	3.00639	1.91644	2.2756	4.3026	1.64304	2.57366	2.92006	1.97545	3.05619	5.29935	1.29785	8.44397	4.00212	5.28223	3.05859	6.42431	1.64853	1.85818	2.72853	3.96926	1.85559	2.98804	4.19967	3.55707	2.09343	3.58266	3.27675	2.49118	5.02352	2.45106	2.47961	5.33452	1.57926	2.13132	3.35459	2.10212	2.3492	2.85464	3.61057	4.05442	5.87437	5.39387	4.50285	2.5662	2.74332	2.88767	3.63159
ACH-002463	RPE1SS77	RPE1SS77_ENGINEERED	3.51819	1.33674	5.59612	5.28405	1.53943	3.24158	3.22017	2.8832	3.51497	3.89096	0.969335	5.92218	3.2602	5.567	2.23938	7.16775	1.41488	1.66233	4.59291	3.49144	1.90488	2.68947	4.9735	6.48965	2.38516	5.96929	3.00684	2.38574	8.29666	2.82947	2.08118	3.64903	2.2865	2.16037	3.32605	1.82098	3.85999	4.60274	4.43327	4.31932	5.00265	5.52116	4.71752	2.09961	3.6266	2.50472	5.97864
ACH-002464	RPE1SS6	RPE1SS6_ENGINEERED	3.39226	2.98703	4.75057	5.46264	1.82858	2.48163	3.64402	1.08839	3.57609	6.49571	1.33888	8.27941	4.47648	5.5428	2.06256	7.04956	1.42066	1.55843	4.10235	3.15396	1.70581	3.03721	6.47587	4.76597	2.325	6.64229	3.32134	2.47319	5.80546	3.22438	1.76971	5.40194	3.04756	1.98244	3.08714	3.18182	3.04658	2.93507	6.08847	3.55026	3.14171	3.44041	3.6282	2.135	3.29954	2.8706	5.76598
ACH-002466	RPE1SS111	RPE1SS111_ENGINEERED	3.15742	1.8943	4.02962	4.85737	1.33626	2.11294	3.57987	2.10501	3.02013	4.11604	1.3914	7.45863	3.75642	5.17967	2.25174	3.44334	1.32523	1.29717	4.25243	4.12192	1.86708	1.91979	5.14429	4.27133	2.76031	4.86004	3.85271	1.88558	5.42169	2.38951	2.32138	4.35683	2.40677	1.99801	3.26013	2.1388	2.1776	2.22276	3.87466	4.20367	6.21688	4.062	3.26311	2.01695	4.17696	4.18906	5.24629
ACH-002467	RPE1SS51	RPE1SS51_ENGINEERED	3.04529	1.88339	4.41894	5.56405	1.48162	2.70722	3.66592	2.44163	2.32088	4.16022	1.22244	5.12569	3.52302	4.13549	2.00971	4.39329	1.17194	1.24905	3.82009	1.89184	1.71346	3.13202	3.68286	4.28675	1.96663	4.29396	3.20606	1.62882	5.91776	1.81264	2.27497	4.5561	2.02072	1.84003	3.19585	1.95611	2.63936	3.04243	4.34601	4.49578	5.35499	4.82316	4.16159	2.02733	3.00156	2.4874	4.32836
ACH-002475	HAP1	HAP1_ENGINEERED	0.421742	0.401248	0.416863	0.214605	0.199728	0.226661	0.913703	0.272116	0.419591	0.626488	0.134576	0.365838	0.947037	0.288421	0.438524	0.840711	0.106917	0.218936	0.270069	0.119009	0.454608	0.257578	0.116767	0.804939	0.442128	0.814096	0.249045	0.517199	0.450111	0.341744	0.260531	0.296898	0.617339	0.524363	0.139482	0.118307	0.739782	0.162588	0.435897	0.513563	0.253314	0.467344	0.509803	0.1943	0.643868	0.381154	0.11106
ACH-002508	WM3211	WM3211_SKIN	3.58447	3.01803	4.11389	5.42311	1.2492	2.70385	3.37353	2.13529	3.52652	3.38502	2.32069	2.79637	4.20631	3.3363	5.8013	1.91464	1.94224	6.16361	2.45594	3.27778	2.39082	2.25669	1.62121	1.79455	1.76547	2.81408	2.79099	3.39704	2.61914	2.59969	4.61744	3.13598	6.87925	2.02372	4.24357	1.75981	2.42832	2.4537	2.34005	4.28326	7.84405	4.58071	3.95362	2.80824	3.78391	6.20969	3.02129
ACH-002509	WM4235	WM4235_SKIN	1.9026	1.67387	1.16879	2.08452	1.32181	1.66117	1.36472	1.55502	2.19977	2.08559	1.41798	2.99812	0.920242	3.73729	1.70415	2.05722	1.29592	1.11477	1.27078	2.39892	1.85451	2.20162	2.41211	1.77918	1.91279	1.55187	2.3572	0.85349	2.26565	1.29228	0.9283	1.42134	4.94059	1.01395	1.99205	1.15108	0.771051	1.79799	2.1204	2.35176	4.02306	2.30427	0.935407	2.95623	2.87736	1.68696	1.87552
ACH-002510	M040416	M040416_SKIN	1.90202	2.06606	1.68271	2.69632	1.46733	2.18442	1.36746	2.86516	2.0949	1.62858	1.09595	4.05461	1.28689	1.34826	1.72927	2.68887	1.02543	0.871351	2.28848	1.45209	1.3451	2.362	1.08635	2.053	0.838075	1.88454	1.9589	1.26309	2.17988	0.52507	1.68001	2.00777	2.29548	2.39779	1.07976	1.726	2.84266	1.10566	1.10048	2.92471	2.15307	2.61119	1.22147	2.84206	2.66358	2.07218	2.31868
ACH-002511	M140325	M140325_SKIN	4.19329	2.14966	6.76404	7.00894	3.29722	2.43504	7.61724	6.42811	4.24258	3.84904	5.048	3.48201	3.73653	4.63607	3.65667	2.20222	2.87329	3.28143	3.11531	3.54001	2.78606	4.09597	1.70863	2.51736	2.92681	2.99134	1.94602	3.85729	2.50738	4.32145	2.01179	4.26506	15.1963	3.01288	2.96151	2.39992	3.69922	3.75503	8.89081	3.39129	2.15434	3.5615	1.58026	4.54718	6.74753	3.28444	6.91756
[truncated: 54 more columns]
